# Supplementary material for: Dual RNAseq Highlights the Kinetics of Skin Microbiome and Fish Host Responsiveness to Bacterial Infection
Source: Research Square preprint supplement (doi:10.21203/rs.3.rs-108248/v1), 2020-11-19
Supplement: Supplementary file 1 [file 9169d8d7633ff71534007a81.xlsx]

## Sheet: DEGs_platax_ctlvsInf_24h
Differentially expressed genes in control vs infected fish at 24hpi
log2FoldChange > 0 indicates up-regulation in infected-24h
Name	log2FoldChange	FDR	Full_name	UniprotIDs
HOST_DN81480_c11_g3_i2	9.91558	1.55524e-19	Complement C3	P98093
HOST_DN65527_c0_g1_i1	9.23751	4.55427e-18
HOST_DN101463_c0_g1_i1	8.87052	3.04002e-12	Adhesion G protein-coupled receptor L2 {ECO:0000303|PubMed:25713288}	B1ALU6; O94882; Q5VX76; Q9UKY5; Q9UKY6
HOST_DN75758_c0_g1_i9	7.931	1.02166e-13
HOST_DN78804_c5_g2_i1	7.87584	1.6701e-16
HOST_DN79782_c1_g2_i1	7.80752	3.73919e-29
HOST_DN112598_c0_g1_i1	7.17462	4.58026e-10	Retinoic acid receptor responder protein 3	Q9UL19; B2R599; B4DDW2; E7ENZ7; O95200
HOST_DN61146_c0_g1_i1	6.99317	6.70436e-25	Neurabin-1	Q9NXT2
HOST_DN79627_c3_g1_i1	6.84057	1.12593e-15	Serotransferrin-1	P80426
HOST_DN79627_c22_g1_i12	6.83334	2.60621e-15	Serotransferrin-1	P80426
HOST_DN81189_c2_g2_i18	6.80779	3.77804e-19	Carcinoembryonic antigen-related cell adhesion molecule 20 {ECO:0000303|PubMed:16139472}	Q9D2Z1; Q80Y42
HOST_DN72565_c1_g1_i1	6.78902	2.79301e-32	Tumor susceptibility gene 101 protein	Q99816; Q9BUM5
HOST_DN73763_c4_g2_i1	6.74752	1.41755e-37
HOST_DN78766_c7_g1_i1	6.71698	1.52574e-14	Adhesion G protein-coupled receptor L2 {ECO:0000303|PubMed:25713288}	B1ALU6; O94882; Q5VX76; Q9UKY5; Q9UKY6
HOST_DN79512_c2_g1_i9	6.7167	2.61799e-15	Chymotrypsin-C	Q7M3E1; A5PJB3
HOST_DN80631_c0_g2_i3	6.6116	1.91711e-16	Pregnancy-specific beta-1-glycoprotein 8	Q9UQ74; A5PKV3; B2RPL4; B4DTI6; O60410; Q68CR6
HOST_DN61146_c0_g3_i1	6.57195	4.411e-14
HOST_DN78766_c7_g2_i5	6.56062	8.26027e-34	Adhesion G protein-coupled receptor L1 {ECO:0000250|UniProtKB:O94910}	O97831; O97830
HOST_DN76341_c4_g6_i1	6.52456	3.58279e-26	L-rhamnose-binding lectin SML {ECO:0000303|PubMed:17184920}	C0HK23
HOST_DN79711_c1_g4_i1	6.52374	0.00245178	E3 ubiquitin-protein ligase MYCBP2 {ECO:0000305}	F1RD40; D3JU51; D3JU52; F1QI76; Q5IBM5; Q7ZZ57; Q8AW10
HOST_DN79077_c2_g2_i1	6.49597	9.96206e-09
HOST_DN74629_c1_g5_i1	6.42545	3.56785e-13	Stathmin-2	P55821
HOST_DN92070_c0_g1_i1	6.41974	2.32159e-10	Adhesion G protein-coupled receptor L1 {ECO:0000312|RGD:620768}	O88917; O09026; O35818; O88916
HOST_DN73589_c1_g1_i4	6.35443	4.99567e-15	Serotransferrin	P79819
HOST_DN74824_c9_g1_i13	6.33711	1.15454e-12	Carcinoembryonic antigen-related cell adhesion molecule 1 {ECO:0000303|Ref.8}	Q9UQV9
HOST_DN81099_c5_g7_i1	6.29746	1.74621e-16	Complement C3	P98093
HOST_DN81474_c3_g1_i3	6.27533	2.70489e-16	Carcinoembryonic antigen-related cell adhesion molecule 1 {ECO:0000303|Ref.8}	Q9UQV9
HOST_DN79627_c20_g2_i1	6.17748	2.82765e-15	Serotransferrin-1	P80426
HOST_DN81480_c10_g1_i6	6.1735	1.18187e-33	Complement C3	P98093
HOST_DN80206_c3_g1_i1	6.15893	1.41286e-15
HOST_DN72181_c0_g1_i1	6.15548	1.89712e-25	Retinol dehydrogenase 12	Q96NR8; B2RDA2; Q8TAW6
HOST_DN77987_c0_g2_i2	6.14931	8.59854e-43	Teneurin-2	Q9NT68; Q9ULU2
HOST_DN79627_c22_g2_i4	6.14766	2.16318e-18	Serotransferrin	P79819
HOST_DN74831_c2_g4_i1	6.13277	4.02417e-42	Thyroxine 5-deiodinase	A7YD35
HOST_DN66400_c0_g1_i1	6.10876	2.20766e-29	Rho-related GTP-binding protein RhoG	P84096; P35238; Q8NI04
HOST_DN74259_c0_g1_i8	6.09048	1.12619e-19	Alcohol dehydrogenase 1	P26325
HOST_DN75504_c0_g1_i1	6.03771	1.45822e-77
HOST_DN74824_c9_g3_i1	6.02634	5.78034e-10	Carcinoembryonic antigen-related cell adhesion molecule 1 {ECO:0000303|Ref.8}	Q9UQV9
HOST_DN80276_c1_g1_i1	5.95785	2.36305e-15	Complement C3	P98093
HOST_DN18264_c0_g1_i1	5.93221	2.92689e-10
HOST_DN79168_c3_g6_i2	5.87092	1.04546e-45	3-hydroxy-3-methylglutaryl-coenzyme A reductase	P04035; B7Z3Y9; Q8N190
HOST_DN78511_c2_g2_i2	5.82421	8.6248e-50
HOST_DN75538_c4_g1_i2	5.78666	8.95418e-13	Chymotrypsin-C	Q7M3E1; A5PJB3
HOST_DN72925_c1_g4_i1	5.75362	1.56239e-14	Complement C3	P98093
HOST_DN77961_c6_g1_i3	5.72474	1.67948e-43
HOST_DN29938_c0_g1_i1	5.71749	4.43038e-11	Leptin	Q588F8
HOST_DN78179_c3_g3_i1	5.69128	5.40382e-55	Interleukin-1 beta	Q9YGD3
HOST_DN80191_c1_g2_i6	5.61086	2.58382e-58	Hydroperoxide isomerase ALOXE3	Q9BYJ1; B2R981; B7Z3W0; Q3ZB74; Q9H4F2; Q9HC22
HOST_DN108346_c0_g1_i1	5.54574	5.74794e-11	Pentraxin-related protein PTX3	P26022; B2R6T6; Q38M82
HOST_DN78560_c0_g1_i7	5.54177	1.12069e-11
HOST_DN77707_c2_g1_i2	5.52003	4.88382e-13	Myotilin	Q9UBF9; A0A4R6; B4DT79
HOST_DN70798_c0_g1_i1	5.49325	1.54e-14	Protein amnionless	Q9BXJ7; Q6UX83
HOST_DN68328_c0_g1_i2	5.4641	5.43349e-57	Proton channel OTOP2 {ECO:0000305}	Q80SX5; Q8CE77
HOST_DN70879_c0_g1_i2	5.46192	3.81253e-38	E3 ubiquitin-protein ligase NEURL3	Q96EH8
HOST_DN75389_c4_g1_i8	5.45794	2.53945e-19
HOST_DN80956_c0_g3_i1	5.41398	7.14716e-17	Dynein regulatory complex subunit 3	Q9H069; A8KAE6; Q86SF9; Q86W73; Q8IWG0
HOST_DN78775_c1_g1_i6	5.40892	1.26327e-31	Chymotrypsin-like elastase family member 2A	P08419
HOST_DN77540_c5_g4_i7	5.39428	7.43382e-69	6-phosphofructo-2-kinase/fructose-2,6-bisphosphatase 4	Q6DTY7; Q5UD55; Q5UD56; Q5UD57; Q5Y296; Q6PFE8
HOST_DN77597_c3_g1_i1	5.35341	3.182e-17	V-set and transmembrane domain-containing protein 2-like protein	Q96N03; E1P5V7; Q5JWZ4; Q5JWZ5; Q8ND45; Q9BR37
HOST_DN81480_c11_g1_i2	5.35256	3.44569e-36	Complement C3	P98093
HOST_DN76626_c0_g1_i11	5.35191	2.19338e-08
HOST_DN71141_c0_g1_i2	5.2398	4.21834e-36	Delta(14)-sterol reductase	Q71KT5; B5LBK0
HOST_DN70868_c0_g1_i1	5.20706	1.01599e-15	DNA damage-inducible transcript 4 protein	Q7T346
HOST_DN91009_c0_g1_i1	5.15972	9.23345e-10	C-type natriuretic peptide 4	Q800I7
HOST_DN76773_c1_g1_i11	5.15733	4.80175e-17	Jhy protein homolog	Q2T9M9
HOST_DN72137_c0_g1_i1	5.1122	4.49224e-14	NADH-cytochrome b5 reductase 2	Q0P487; A2CET6
HOST_DN73190_c0_g1_i2	5.08848	2.87254e-34	Heat shock protein beta-8	Q5RAB0; Q5RDB3
HOST_DN75990_c6_g1_i1	5.00941	1.38155e-39	Large neutral amino acids transporter small subunit 4	Q0VCM6
HOST_DN67818_c0_g1_i1	5.001	4.60189e-19	Sodium- and chloride-dependent GABA transporter 2	A5PJX7
HOST_DN73213_c0_g1_i1	4.99411	1.9069e-22	Glutamate receptor-interacting protein 1	Q9Y3R0; C9JT59; Q1RLM0
HOST_DN129775_c0_g1_i1	4.98868	3.53331e-47
HOST_DN77343_c3_g1_i1	4.98489	6.48367e-51	ADM2	Q7Z4H4; Q3LFQ0
HOST_DN67809_c0_g1_i1	4.95609	4.93879e-62	Putative fibroblast growth factor 1	Q6PBT8; Q5TLE3
HOST_DN143421_c0_g1_i1	4.95254	6.15543e-72
HOST_DN43097_c0_g1_i1	4.9051	5.67638e-41	Kazrin	Q5FWS6
HOST_DN74292_c5_g1_i2	4.86587	1.05509e-18	1,25-dihydroxyvitamin D(3) 24-hydroxylase, mitochondrial	Q07973; Q15807; Q32ML3; Q5I2W7
HOST_DN60725_c0_g2_i1	4.85465	4.02579e-38
HOST_DN75538_c4_g3_i3	4.84485	1.02008e-15	Chymotrypsin-C	Q7M3E1; A5PJB3
HOST_DN68689_c0_g1_i1	4.83056	1.26759e-14	Tripartite motif-containing protein 16	Q99PP9; Q7TPY6; Q8C332; Q8C6V0
HOST_DN80191_c0_g1_i1	4.77557	1.0943e-90	Arachidonate 12-lipoxygenase, 12R-type	O75342
HOST_DN74936_c3_g2_i2	4.77034	1.70102e-13	Complement C3	P98093
HOST_DN80191_c1_g1_i1	4.75703	8.49779e-114	Arachidonate 12-lipoxygenase, 12R-type	O75342
HOST_DN79608_c4_g2_i2	4.75031	4.14212e-24	Cdc42 effector protein 3	Q9UKI2; B2R8S0; O95353; Q9UQJ0
HOST_DN80551_c1_g1_i1	4.73358	3.1425e-15	Atrial natriuretic peptide receptor 3	P17342; A2RRD1; B4DT84; E7EPG9
HOST_DN77944_c1_g2_i1	4.72065	2.03392e-13	Myeloid-associated differentiation marker homolog	Q63ZU3
HOST_DN114328_c0_g1_i1	4.69079	2.8428e-12
HOST_DN160744_c0_g1_i1	4.67759	1.74124e-31
HOST_DN75260_c1_g2_i2	4.64665	4.95744e-26	Prosaposin receptor GPR37	O15354; A4D0Y6; O00348; O14768; Q8TD39
HOST_DN73875_c4_g3_i1	4.64457	1.243e-50	Lanosterol 14-alpha demethylase	Q4R8S6; Q4R5W7
HOST_DN78797_c1_g1_i1	4.6438	1.99625e-11
HOST_DN75658_c0_g3_i2	4.64303	1.26128e-12
HOST_DN79651_c0_g1_i6	4.62668	3.6059e-72	Alkaline phosphatase	P83456
HOST_DN70267_c0_g1_i1	4.60028	1.15369e-14	Calcium/calmodulin-dependent protein kinase type 1G	Q7TNJ7; O08763; Q7TNJ6
HOST_DN79097_c3_g1_i1	4.57821	1.02106e-97	Excitatory amino acid transporter 1 {ECO:0000303|PubMed:9425012}	O57321
HOST_DN70656_c0_g1_i1	4.56367	3.09668e-70	Prostaglandin E synthase	Q95L14; Q0P5C8
HOST_DN77953_c0_g12_i1	4.55399	5.27461e-10	Adhesion G protein-coupled receptor L1 {ECO:0000250|UniProtKB:O94910}	O97831; O97830
HOST_DN78455_c2_g1_i3	4.54892	8.23842e-16	Glutamate receptor-interacting protein 2	A8E0R9; A2Q054; A8JL03
HOST_DN65345_c0_g1_i1	4.53932	5.94684e-64	Interleukin-8	P08317; Q546U2
HOST_DN79157_c3_g2_i4	4.53708	4.14269e-46	Kazrin-A	A9C3W3
HOST_DN76450_c4_g2_i1	4.53264	3.46976e-63
HOST_DN65914_c0_g1_i1	4.53246	1.84174e-27	Phospholipid phosphatase 3 {ECO:0000312|RGD:620454}	P97544
HOST_DN76982_c0_g1_i1	4.50392	2.79001e-80	L-lactate dehydrogenase A chain	P69084; O93620
HOST_DN73913_c1_g3_i6	4.49771	1.48994e-34	Metalloreductase STEAP4	Q687X5; Q658Q9; Q687X4; Q8WWB0; Q9H5R1
HOST_DN69861_c0_g1_i1	4.49451	7.73796e-68
HOST_DN145622_c0_g1_i1	4.47146	3.01998e-12	Excitatory amino acid transporter 1 {ECO:0000303|PubMed:9425012}	O57321
HOST_DN75260_c1_g8_i1	4.4515	5.86048e-14	Prosaposin receptor GPR37	O15354; A4D0Y6; O00348; O14768; Q8TD39
HOST_DN74154_c2_g4_i4	4.45066	3.29626e-74
HOST_DN78818_c1_g2_i1	4.44754	3.36645e-15	Lanosterol synthase	P48450; Q62811
HOST_DN68847_c0_g1_i1	4.44478	5.04083e-26	Cytidine deaminase	P32320
HOST_DN76450_c5_g2_i1	4.44136	2.46391e-32	Dual specificity protein phosphatase 4	Q13115; B2RBU5; D3DSU4; G5E930; Q13524
HOST_DN78577_c0_g1_i2	4.42973	2.78063e-32	Metalloproteinase inhibitor 2	Q9WUC6
HOST_DN76382_c0_g1_i1	4.42777	6.04072e-33	Hepatocyte growth factor activator	Q04756; Q14726; Q2M1W7; Q53X47
HOST_DN79015_c4_g1_i3	4.42069	4.05287e-20	Microfibril-associated glycoprotein 4	P55918; Q29S09; Q8HY48
HOST_DN78761_c4_g2_i1	4.41037	1.02552e-89	Transmembrane protein 51	Q9NW97; A8K819
HOST_DN75957_c4_g3_i4	4.39198	4.82313e-56	Acyl-CoA desaturase	Q92038
HOST_DN115243_c0_g1_i1	4.37986	1.14941e-32	Kazrin	Q8N409; Q9UIL2; Q9UPX4
HOST_DN73683_c0_g1_i1	4.34951	2.8217e-35	Squalene monooxygenase	Q14534; Q9UEK6
HOST_DN78096_c3_g4_i1	4.34898	1.1101e-46	Cdc42 effector protein 2	Q5PQP4
HOST_DN75325_c5_g1_i4	4.33951	2.23754e-17
HOST_DN71669_c1_g1_i1	4.33579	7.11416e-52	Cholesterol 25-hydroxylase	Q9Z0F5; Q3TUM6; Q8CHQ2
HOST_DN77088_c2_g2_i1	4.33187	1.35306e-55	Methylsterol monooxygenase 1	Q7ZW77
HOST_DN76931_c0_g2_i1	4.31334	1.51028e-13	Ceruloplasmin	P13635; Q64719
HOST_DN77025_c5_g2_i3	4.29079	6.58076e-99	Transcobalamin-2	Q9XSC9; Q0V8P0; Q1RMV8; Q58CR7; Q58DL8; Q9TR25
HOST_DN79460_c5_g1_i5	4.29073	1.38573e-10	Complement component C6	Q811M5
HOST_DN68444_c0_g2_i1	4.22558	2.1654e-35
HOST_DN77935_c3_g1_i1	4.21907	1.74152e-13	Clavesin-2	Q5SPP0
HOST_DN68444_c0_g3_i1	4.20986	1.48245e-32	NADPH oxidase organizer 1	Q8NFA2; Q86YM1; Q8NFA3; Q96B73
HOST_DN72235_c0_g1_i4	4.19986	2.42307e-19	Coiled-coil domain-containing protein 13 {ECO:0000305}	Q8IYE1
HOST_DN68444_c0_g1_i1	4.1822	1.38089e-33	NADPH oxidase organizer 1	Q8NFA2; Q86YM1; Q8NFA3; Q96B73
HOST_DN78162_c4_g1_i2	4.16445	3.08462e-66	Protein ABHD12B {ECO:0000305}	Q7Z5M8; Q3KNR9; Q3KNS0; Q7Z5M6; Q7Z5M7; Q8N4D2
HOST_DN81118_c0_g1_i1	4.16057	5.55192e-20
HOST_DN72925_c1_g1_i7	4.1355	4.96483e-13	Complement C3	P98093
HOST_DN70721_c0_g1_i2	4.13134	4.27121e-32	Solute carrier organic anion transporter family member 2A1	Q00910
HOST_DN76786_c8_g1_i3	4.12155	2.15714e-28	Putative ferric-chelate reductase 1	Q6INU7
HOST_DN78862_c1_g2_i2	4.09029	2.44246e-97	Anthrax toxin receptor 2	Q6DFX2; Q99L17
HOST_DN82534_c0_g1_i1	4.08043	2.60503e-10	Neuromedin-K receptor	P29371; Q0P510
HOST_DN93259_c0_g1_i1	4.07601	4.86493e-16	Hyaluronidase-5 {ECO:0000312|MGI:MGI:1921718}	Q812F3
HOST_DN74706_c2_g1_i1	4.0741	3.62313e-27
HOST_DN71528_c0_g1_i1	4.05841	6.78843e-09	Protein-glutamine gamma-glutamyltransferase 2	Q01841
HOST_DN80726_c0_g1_i1	4.05713	5.39038e-10	G0/G1 switch protein 2	P27469; Q6FGC8
HOST_DN66157_c0_g2_i1	4.0441	1.26119e-14	Proteinase-activated receptor 3	Q920E1
HOST_DN141408_c0_g1_i1	4.04304	1.17688e-38	Dual specificity protein phosphatase 4	Q8BFV3
HOST_DN77831_c5_g3_i1	4.04157	5.39038e-10
HOST_DN76803_c4_g5_i1	4.01384	1.81779e-58	7-dehydrocholesterol reductase	Q7SXF1
HOST_DN91976_c0_g1_i1	4.01068	2.12693e-14	Pentraxin-related protein PTX3	P26022; B2R6T6; Q38M82
HOST_DN76277_c1_g1_i1	4.00354	1.6292e-75	Arginase, non-hepatic 2	Q91554
HOST_DN75994_c2_g1_i1	3.99787	9.88141e-28	Caspase-7	P97864; O08669
HOST_DN79214_c5_g3_i1	3.97799	3.50088e-23	Homeobox protein Nkx-2.3	P97334; Q9QZ60; Q9WV67
HOST_DN78800_c5_g1_i1	3.92173	4.05459e-37	Solute carrier family 35 member G1	Q2M3R5; Q86YG5; Q8NBA5
HOST_DN72091_c1_g1_i1	3.92142	1.88527e-08	Chymotrypsin-like elastase family member 2A	P05208
HOST_DN70095_c0_g2_i1	3.92127	1.99924e-20	LRRN4 C-terminal-like protein	Q3TYX2
HOST_DN73396_c0_g1_i2	3.91665	1.39206e-08	Transmembrane protein 151B	A3KN95
HOST_DN78109_c4_g1_i1	3.90961	1.35938e-59	Platelet-activating factor receptor	P21556
HOST_DN14174_c0_g1_i1	3.90833	3.33949e-16	Pentraxin-related protein PTX3	P48759; Q8VDF1
HOST_DN72793_c0_g1_i5	3.9075	2.2056e-17	cAMP-responsive element modulator	P79145
HOST_DN79784_c0_g4_i2	3.90634	2.05852e-28	Cadherin-2	Q90275; Q8UVQ7
HOST_DN77113_c2_g2_i2	3.90175	9.39016e-13	Dimethylaniline monooxygenase [N-oxide-forming] 2	P36366; Q05194
HOST_DN77635_c4_g1_i2	3.8746	2.2741e-31	Matrix metalloproteinase-9	P14780; B2R7V9; Q3LR70; Q8N725; Q9H4Z1; Q9UCJ9; Q9UCL1; Q9UDK2
HOST_DN69378_c0_g1_i1	3.86793	7.94151e-11	SH3 and cysteine-rich domain-containing protein 2	Q8R1B0; Q8BV93; Q8K2U4
HOST_DN68665_c0_g1_i2	3.85632	2.48681e-12	Beta-1,3-galactosyl-O-glycosyl-glycoprotein beta-1,6-N-acetylglucosaminyltransferase	Q09324; O35981; Q8BRB2
HOST_DN34486_c0_g1_i1	3.85175	3.43165e-41	Myeloid-associated differentiation marker homolog	Q63ZU3
HOST_DN73038_c0_g1_i3	3.8492	9.59101e-34	Probable tubulin polyglutamylase TTLL1	Q0VC71
HOST_DN75251_c2_g2_i1	3.83968	6.59814e-11
HOST_DN70850_c0_g1_i1	3.83213	9.94848e-40	3-beta-hydroxysteroid-Delta(8),Delta(7)-isomerase	Q15125; Q6FGL3; Q6IBI9
HOST_DN79772_c5_g1_i3	3.83173	1.97649e-101	Alpha-enolase {ECO:0000250|UniProtKB:P04764}	I0J1J1; B3A0L7
HOST_DN71216_c0_g1_i1	3.82466	1.09162e-14	Proline-rich transmembrane protein 4	C9JH25; A4D0Z9; C9JVW7
HOST_DN80166_c1_g1_i1	3.81196	5.16686e-17	Neuroglobin	Q90W04; Q4RLY5
HOST_DN79157_c3_g1_i2	3.79076	1.30958e-45	Kazrin	Q5FWS6
HOST_DN74687_c2_g1_i3	3.78548	2.04575e-51	Hyaluronidase-5 {ECO:0000312|MGI:MGI:1921718}	Q812F3
HOST_DN75449_c3_g1_i2	3.76735	3.71846e-29	Rho GTPase-activating protein 6	O54834; A2ABW4; A2AC55; Q3TMC2; Q8BG83; Q8C842; Q9QZL8
HOST_DN72117_c0_g1_i2	3.74992	1.11094e-09	ADP-ribosylation factor 4	P51644; Q5D083
HOST_DN73163_c0_g1_i1	3.73916	1.79803e-15	Uridine phosphorylase 1	P52624; Q8JZX0
HOST_DN81466_c8_g1_i1	3.73408	2.43758e-10	Apolipoprotein B-100	E9Q414; Q3UH74; Q497D8; Q61314; Q61318; Q8CGG8
HOST_DN80463_c0_g2_i1	3.722	1.11148e-82	Proepiregulin	O14944; B2RC66; Q6FH69
HOST_DN77899_c4_g4_i6	3.72146	2.07295e-20	Collagenase 3	Q10835
HOST_DN68307_c0_g1_i1	3.72034	2.40285e-60
HOST_DN79200_c1_g1_i2	3.70683	4.25523e-26	Circadian-associated transcriptional repressor	Q3TQ03; Q3U1B8
HOST_DN76497_c1_g1_i4	3.6973	1.25759e-93	Semaphorin-7A	Q9QUR8; O88371
HOST_DN77413_c9_g1_i5	3.68445	1.61824e-39	ERBB receptor feedback inhibitor 1	Q9UJM3; B2RDX9; Q9NTG9; Q9UD05
HOST_DN72912_c0_g2_i2	3.68272	7.46199e-28	MAPK regulated corepressor interacting protein 2	Q9CQB2
HOST_DN70076_c0_g1_i2	3.6788	5.46832e-97	Solute carrier family 2, facilitated glucose transporter member 3	P28568
HOST_DN78918_c0_g1_i1	3.66336	2.33795e-16	Interleukin-13 receptor subunit alpha-2	Q14627; A8K7E2; O00667
HOST_DN79322_c3_g1_i1	3.65568	3.41051e-27
HOST_DN54191_c0_g1_i1	3.65156	2.17671e-07
HOST_DN73373_c2_g2_i8	3.65132	5.04027e-10
HOST_DN70541_c0_g1_i1	3.63038	1.75842e-37	4-hydroxyphenylpyruvate dioxygenase-like protein	Q96IR7; B2R9B0
HOST_DN64977_c0_g1_i1	3.62558	5.97004e-24	Protein-glutamine gamma-glutamyltransferase K	P22735; B4DWR7; Q197M4
HOST_DN38859_c0_g2_i1	3.62392	2.39354e-30	Hormonally up-regulated neu tumor-associated kinase	O88866
HOST_DN81389_c2_g1_i1	3.61853	9.25936e-20	Hormonally up-regulated neu tumor-associated kinase homolog	B1WAS2
HOST_DN79288_c9_g1_i1	3.60102	1.68569e-09	Dimethylaniline monooxygenase [N-oxide-forming] 3	P97501
HOST_DN84752_c0_g1_i1	3.59302	2.13021e-82	Solute carrier family 2, facilitated glucose transporter member 3	P11169; B2R606; D3DUU6; Q6I9U2; Q9UG15
HOST_DN78973_c0_g1_i13	3.5784	1.24682e-14	Cell cycle checkpoint control protein RAD9B	Q6WBX8; Q5U5K0; Q6NVJ1; Q6ZVT7; Q8N7T9; Q96LI8
HOST_DN78141_c1_g2_i2	3.56436	7.05069e-22	Transposable element Tc1 transposase	P03934; Q23636
HOST_DN72794_c0_g1_i1	3.53186	1.01615e-26	Serine/threonine-protein kinase Sgk1	Q6U1I9
HOST_DN65775_c0_g2_i1	3.53119	4.42924e-07	WD repeat-containing protein 49	Q8IV35; Q8N297
HOST_DN81083_c5_g1_i7	3.52933	1.88383e-39	Neutral cholesterol ester hydrolase 1	B2GV54
HOST_DN75641_c6_g1_i5	3.52924	1.20306e-37	Protein-glutamine gamma-glutamyltransferase K	P22735; B4DWR7; Q197M4
HOST_DN79682_c3_g8_i2	3.52605	7.99243e-27
HOST_DN78815_c3_g1_i4	3.52484	1.09318e-134	Glycogen phosphorylase, muscle form	P11217; A0AVK1; A6NDY6
HOST_DN77242_c3_g1_i2	3.51314	2.48754e-31	Transcription activator BRG1	P51532; B1A8Z4; B1A8Z5; B1A8Z6; B1A8Z7; E9PBR8; O95052; Q9HBD3
HOST_DN71994_c0_g1_i3	3.49952	5.43657e-22	Proprotein convertase subtilisin/kexin type 9	Q8NBP7; A8T640; C0JYY9; Q5PSM5; Q5SZQ2
HOST_DN85192_c0_g1_i1	3.49005	4.11719e-11	Proteinase-activated receptor 1	P47749
HOST_DN79044_c4_g1_i2	3.48817	2.50288e-13	Platelet basic protein	P02775; B2R5F3; Q6IBJ8
HOST_DN76254_c0_g4_i1	3.48352	3.48797e-30	Plexin-B1	O43157; A6H8Y2; Q6NY20; Q9UIV7; Q9UJ92; Q9UJ93
HOST_DN34546_c0_g1_i1	3.47372	5.20631e-10	ATP-dependent 6-phosphofructokinase, platelet type {ECO:0000255|HAMAP-Rule:MF_03184}	Q5R636
HOST_DN80072_c4_g1_i5	3.47339	6.87917e-64	Hydroxymethylglutaryl-CoA synthase, cytoplasmic	P23228
HOST_DN81363_c1_g2_i2	3.47085	5.69766e-135	Glycogen phosphorylase, liver form	Q5MIB5
HOST_DN70715_c0_g1_i1	3.45477	2.58051e-50	Inactive dipeptidyl peptidase 10	Q53SS4; Q6TTV4; Q86YR9; Q9P236
HOST_DN79162_c0_g3_i1	3.44323	9.87881e-58	GTPase HRas	P08642
HOST_DN80059_c3_g1_i1	3.43849	5.73032e-43	Actin-fragmin kinase	P80197; Q94706
HOST_DN78329_c1_g1_i2	3.43507	9.85861e-10	Kelch-like protein 33	A6NCF5
HOST_DN71456_c0_g1_i1	3.43141	4.13745e-83	Carbonic anhydrase 6	P23280; E7EMQ1; Q5FBW3; Q5FC00; Q96QX8; Q9UF03
HOST_DN79466_c1_g1_i1	3.41293	7.25572e-33
HOST_DN79637_c4_g2_i5	3.40706	8.31151e-64
HOST_DN72876_c1_g1_i1	3.40583	2.31856e-25
HOST_DN69107_c0_g1_i3	3.39853	3.74613e-15	Complement C1q-like protein 4	Q4ZJM9; B2RV40
HOST_DN32946_c0_g1_i1	3.39219	3.13746e-07
HOST_DN108454_c0_g1_i1	3.3828	3.25377e-21	DELTA-sagatoxin-Srs1a {ECO:0000303|PubMed:22683676}	Q86FQ0
HOST_DN69964_c0_g1_i3	3.38125	2.40968e-07	Ladderlectin	P81018
HOST_DN78779_c5_g1_i3	3.37903	2.13052e-07	Dimethylaniline monooxygenase [N-oxide-forming] 5	Q8K4C0; Q6IRL0
HOST_DN76639_c5_g4_i1	3.37769	2.61643e-19	Zinc finger protein 514	Q96K75; Q5JPJ3
HOST_DN17056_c0_g2_i1	3.37701	1.67735e-07
HOST_DN79850_c7_g1_i1	3.37096	2.34198e-29	Prostaglandin G/H synthase 2	P27607
HOST_DN78399_c3_g6_i1	3.36906	1.45839e-36	AT-rich interactive domain-containing protein 3B	Q8IVW6; O95443; Q59HC9; Q6P9C9
HOST_DN52282_c0_g1_i1	3.36178	3.63164e-10	Proteinase-activated receptor 1	P56488
HOST_DN76638_c3_g1_i5	3.36064	1.07163e-20	Regulator of G-protein signaling 11	Q9Z2H1; Q8VCJ1
HOST_DN77858_c0_g5_i1	3.35618	0.000230844	C-Jun-amino-terminal kinase-interacting protein 1	Q9UQF2; D3DQP4; O43407
HOST_DN76214_c1_g1_i1	3.35613	2.15816e-09	Heat shock protein HSP 90-alpha 1	Q90474; Q5RG13; Q6DI33
HOST_DN77575_c4_g1_i1	3.35557	1.35462e-33
HOST_DN79637_c4_g5_i1	3.33862	1.78085e-29
HOST_DN75387_c4_g2_i2	3.32954	9.61652e-59	Low-density lipoprotein receptor 2	Q99088
HOST_DN69160_c0_g1_i2	3.31871	5.88324e-09
HOST_DN73789_c0_g1_i1	3.31376	1.42524e-79	Transferrin receptor protein 1	Q9GLD3
HOST_DN75963_c0_g2_i1	3.31328	1.11216e-26	P2Y purinoceptor 4	O35811
HOST_DN70920_c0_g1_i1	3.29814	1.55382e-61	Annexin A3	P12429; B2R9W6; Q6LET2
HOST_DN80093_c5_g1_i1	3.27568	4.65049e-20
HOST_DN73229_c0_g1_i2	3.27158	3.81644e-44	Cytochrome c-b	Q1KKS2
HOST_DN76254_c0_g11_i1	3.27119	1.76724e-26
HOST_DN75179_c1_g6_i3	3.27102	8.88062e-19	Ras-related protein Rab-3A	P11023; Q17QM2
HOST_DN80198_c6_g1_i7	3.26149	3.71237e-41	Vascular endothelial growth factor receptor kdr-like	Q8AXB3; A1L1P1; B0R127; O42377; P79743; Q8UUW9; Q98891; Q9PTL0
HOST_DN78168_c4_g1_i2	3.24805	1.36202e-23	Cytokine receptor-like factor 1	O75462; Q9UHH5
HOST_DN81466_c8_g4_i1	3.24032	1.5473e-07
HOST_DN80757_c3_g2_i2	3.23433	4.69275e-23	Syntaxin-11	O75558; E1P598; O75378; O95148; Q5TCL6
HOST_DN76474_c1_g1_i1	3.22634	8.74671e-35	Cytosolic acyl coenzyme A thioester hydrolase	Q91V12; A2A8K9; A2A8L0; A2A8L2; Q3U8C6; Q59HQ2
HOST_DN74667_c2_g1_i1	3.22197	7.31603e-32	Usher syndrome type-1G protein homolog	Q80T11; Q80UG0
HOST_DN75005_c1_g1_i3	3.22121	5.25618e-54	Latent-transforming growth factor beta-binding protein 2	Q14767; Q99907; Q9NS51
HOST_DN76587_c7_g1_i1	3.22016	3.2898e-12
HOST_DN67449_c0_g1_i1	3.21185	2.37375e-28	Ammonium transporter Rh type C	Q19KH7
HOST_DN146997_c0_g1_i1	3.20929	7.27216e-12	Sortilin	O54861; O35389
HOST_DN108288_c0_g1_i1	3.20413	5.7698e-09
HOST_DN74467_c0_g2_i1	3.20142	1.45062e-06	Sodium/potassium-transporting ATPase subunit beta-3	P21188
HOST_DN77847_c0_g1_i3	3.19956	2.44418e-07	Uricase {ECO:0000255|PIRNR:PIRNR000241, ECO:0000255|RuleBase:RU004455, ECO:0000305}	Q6DG85
HOST_DN77987_c0_g5_i2	3.19675	6.43025e-16	Teneurin-1	Q9W6V6
HOST_DN71642_c0_g1_i1	3.19549	9.72124e-07	Leucine-rich repeat-containing protein 56	Q4V8C9
HOST_DN77195_c3_g1_i1	3.19107	1.03883e-10	Latent-transforming growth factor beta-binding protein 2	Q28019
HOST_DN81222_c2_g9_i1	3.17684	1.9088e-17	Retinal-specific ATP-binding cassette transporter	O35600
HOST_DN76992_c2_g1_i1	3.17053	8.23785e-38	Plexin-B1	O43157; A6H8Y2; Q6NY20; Q9UIV7; Q9UJ92; Q9UJ93
HOST_DN76088_c3_g1_i1	3.15522	1.08447e-79	Interleukin-1 receptor-associated kinase 3	Q9Y616; B4DQ57
HOST_DN79911_c0_g3_i5	3.15016	8.42716e-14	Complement factor B	P81187; Q2KIU6
HOST_DN76782_c1_g1_i1	3.14914	6.90609e-52	Traf2 and NCK-interacting protein kinase	P83510
HOST_DN71619_c0_g1_i1	3.14817	3.22674e-97	Glycogen [starch] synthase, muscle	P13834; O18817
HOST_DN79306_c0_g1_i4	3.14803	6.21042e-10
HOST_DN74102_c0_g1_i1	3.14382	2.71124e-35	Farnesyl pyrophosphate synthase	P08836
HOST_DN69010_c0_g1_i1	3.1415	8.14109e-05	C-Jun-amino-terminal kinase-interacting protein 1	Q9R237; O88979; Q9R1H8; Q9WVI5; Q9WVI6
HOST_DN76553_c0_g1_i1	3.13142	4.78975e-23	Ammonium transporter Rh type C 2	Q7T3R4
HOST_DN79506_c3_g2_i2	3.12853	7.40926e-06	WD repeat-containing protein 47	O94967; A8MX09; Q5TYV7; Q5TYV8; Q5TYV9; Q8IXT7; Q8IYU9
HOST_DN78711_c3_g2_i1	3.12691	1.59298e-42	Regulator of G-protein signaling 1	A1A643
HOST_DN69048_c0_g1_i1	3.12616	2.5933e-21	Laminin subunit gamma-2	Q13753; Q02536; Q02537; Q13752; Q14941; Q14DF7; Q2M1N2; Q5VYE8
HOST_DN73165_c0_g1_i3	3.12227	6.62338e-42	Inositol monophosphatase 1	P29218; B2R733; B4DLN3; B7Z6Q4; J3KQT7; Q9UK71
HOST_DN107243_c0_g1_i1	3.10931	2.4056e-19	Laminin subunit gamma-2	Q8HZI9
HOST_DN58318_c0_g1_i2	3.1059	3.2781e-06	Atrial natriuretic peptide-converting enzyme	Q9Y5Q5; B0ZBE3; Q2TBD2; Q4W5E5; Q4W5G6; Q9UHY2
HOST_DN74464_c5_g1_i4	3.10434	1.16664e-12	Calcium and integrin-binding family member 2	Q9Z309
HOST_DN80361_c0_g1_i10	3.10228	2.07385e-102	Sn1-specific diacylglycerol lipase beta	Q8WXE6
HOST_DN77514_c2_g1_i2	3.09637	4.58214e-45	Tyrosine-protein kinase ABL2	Q6NZY6; Q7Z301
HOST_DN81085_c5_g3_i1	3.09633	1.63868e-87	Hexokinase-1	Q9NNZ5
HOST_DN77794_c0_g3_i2	3.08259	3.80261e-29	Delta(24)-sterol reductase	Q15392; B7Z817; D3DQ51; Q9HBA8
HOST_DN75368_c0_g1_i1	3.08143	5.65509e-59	NAD-dependent malic enzyme, mitochondrial	Q99KE1; Q3TBM8
HOST_DN139231_c0_g1_i1	3.07656	8.88413e-08
HOST_DN75737_c0_g1_i8	3.07287	8.17434e-24	Excitatory amino acid transporter 1	P56564; Q99P53
HOST_DN75859_c2_g1_i1	3.07138	9.8758e-92	Ceramide synthase 5	Q8N5B7; B4DV54
HOST_DN139663_c0_g1_i1	3.06676	1.73318e-51	Leukotriene B4 receptor 1	O88855
HOST_DN71632_c0_g2_i2	3.05559	3.62318e-12	GPI-linked NAD(P)(+)--arginine ADP-ribosyltransferase 1	Q60935; P70688
HOST_DN54773_c0_g1_i1	3.05439	3.98951e-62	Cytochrome P450 1A1	O42430
HOST_DN61529_c0_g2_i1	3.0537	2.60041e-08	Myomesin-3	A2ABU4
HOST_DN77195_c3_g4_i1	3.05137	9.18392e-21	Latent-transforming growth factor beta-binding protein 2	O35806
HOST_DN77656_c1_g3_i1	3.04698	1.24248e-21	Probable ergosterol biosynthetic protein 28	Q5R589
HOST_DN166317_c0_g1_i1	3.04175	8.78045e-20	Laminin subunit gamma-2	Q61092
HOST_DN71680_c0_g1_i1	3.03761	1.13336e-29	Fructose-1,6-bisphosphatase isozyme 2	Q9Z1N1
HOST_DN77891_c0_g1_i1	3.03436	1.64408e-17
HOST_DN56873_c0_g1_i2	3.03273	4.64373e-17	cAMP-specific 3',5'-cyclic phosphodiesterase 4B	P14646; Q5RKL0; Q8VD81; Q8VD82
HOST_DN1698_c0_g1_i1	3.03044	6.00791e-10
HOST_DN81003_c0_g1_i2	3.02685	3.1604e-94	Fatty acid synthase	P12276
HOST_DN66157_c0_g1_i1	3.01639	3.25506e-12	Proteinase-activated receptor 3	O00254; B2R754; B4DQ13; Q52M68; Q7Z3W3
HOST_DN75969_c0_g1_i2	3.00733	7.51436e-30	Electrogenic sodium bicarbonate cotransporter 1	Q4U116; Q4U115; Q5EC51; Q5EC52; Q864R7
HOST_DN71577_c0_g1_i1	3.00244	4.09423e-11	Glutathione-specific gamma-glutamylcyclotransferase 1 {ECO:0000250|UniProtKB:Q9BUX1}	Q5SPB6
HOST_DN78866_c4_g1_i4	2.99923	2.2389e-103	Glycogenin-1	P46976; D3DNH0; D3DNH1; D3DNH2; Q6FHZ1; Q9UNV0
HOST_DN73000_c0_g1_i2	2.99446	1.42268e-23	Sterol-4-alpha-carboxylate 3-dehydrogenase, decarboxylating	Q9R1J0; O55109
HOST_DN79716_c5_g6_i1	2.98856	1.70483e-15
HOST_DN75805_c8_g1_i1	2.98407	7.63971e-34	Smoothelin-like protein 2	Q8CI12
HOST_DN68046_c0_g1_i1	2.97902	4.36605e-11	Protachykinin	P25421; Q6LCG4
HOST_DN75969_c2_g1_i1	2.96704	2.1911e-05	Electrogenic sodium bicarbonate cotransporter 1	O13134
HOST_DN77890_c7_g3_i2	2.96491	5.51911e-07
HOST_DN74331_c4_g1_i1	2.96278	4.24402e-12	Complement factor H	P06909; Q6NZK3
HOST_DN56449_c0_g1_i1	2.96119	8.78689e-07	TNFAIP3-interacting protein 2	Q99JG7; Q3TVF3
HOST_DN79952_c0_g1_i5	2.959	2.78613e-19	G1/S-specific cyclin-D2	Q8WNW2
HOST_DN80585_c5_g1_i5	2.95711	2.90167e-40
HOST_DN76320_c1_g1_i11	2.95487	4.5586e-13	piRNA biogenesis protein EXD1 {ECO:0000305}	Q0P3U3
HOST_DN71383_c0_g1_i1	2.94793	4.85548e-19	Frizzled-8	O93274; Q9YI55
HOST_DN74687_c2_g3_i1	2.94527	1.57229e-05	Hyaluronidase-5 {ECO:0000312|MGI:MGI:1921718}	Q812F3
HOST_DN32930_c0_g1_i1	2.9425	6.41574e-17
HOST_DN80550_c0_g4_i1	2.93644	6.90587e-07	ZP domain-containing protein {ECO:0000303|PubMed:23765379}	G8HTB6
HOST_DN78750_c1_g1_i15	2.93614	2.25145e-08	FERM and PDZ domain-containing protein 4	Q14CM0; A8K0X9; O15032
HOST_DN76429_c0_g2_i6	2.93348	6.60179e-20	Borealin-2 {ECO:0000250|UniProtKB:Q4V7H8}	P86347
HOST_DN76165_c4_g1_i5	2.9241	6.47407e-22	Nocturnin {ECO:0000250|UniProtKB:P79942, ECO:0000312|RGD:1587344}	Q9ET55; G3V7F4
HOST_DN76545_c2_g2_i4	2.92368	4.14266e-42	Proheparin-binding EGF-like growth factor	Q9W7C5
HOST_DN73699_c0_g2_i1	2.91951	3.61749e-07
HOST_DN75163_c0_g1_i1	2.91531	6.62342e-61	Pleckstrin homology domain-containing family G member 3	Q8TEF5; Q96EW6; Q9BT82
HOST_DN2584_c0_g1_i1	2.9138	7.18396e-13
HOST_DN78156_c1_g4_i1	2.9098	1.99684e-07	Centriolar coiled-coil protein of 110 kDa	O43303; B7WP23; O43335; Q68DV9; Q8NE13
HOST_DN70479_c0_g1_i2	2.90811	1.12766e-07	Solute carrier family 2, facilitated glucose transporter member 5	Q8WMN1
HOST_DN77326_c3_g1_i5	2.89973	4.7399e-14	Nuclear receptor subfamily 1 group I member 2	Q9UJ26; Q9UJ27; Q9UNW4
HOST_DN77231_c2_g1_i4	2.89854	7.61553e-21	Thrombospondin-1	P35448
HOST_DN74505_c1_g1_i13	2.89751	9.2646e-19
HOST_DN78820_c6_g1_i5	2.8951	9.84818e-33	Cytospin-A	Q2KN97
HOST_DN80609_c2_g1_i2	2.89193	9.93834e-25	Calcipressin-1	Q9BU69; Q9UF15; Q9UME4
HOST_DN75232_c6_g1_i1	2.8789	3.804e-25	Glycerophosphodiester phosphodiesterase domain-containing protein 5	Q3KTM2
HOST_DN79232_c6_g1_i4	2.87774	2.70612e-18	Polyhomeotic-like protein 2	Q8QHL5; Q6DGB9; Q6TGW0; Q7ZYX8; Q8QHL4
HOST_DN79211_c3_g2_i1	2.87118	2.58481e-14	Egl nine homolog 3	Q9H6Z9; Q2TA79; Q3B8N4; Q6P1R2
HOST_DN72530_c0_g1_i7	2.87092	6.76648e-27	Prostamide/prostaglandin F synthase	B5X9L9
HOST_DN79621_c1_g1_i19	2.87012	5.04716e-61	Complement factor H	P06909; Q6NZK3
HOST_DN80124_c5_g5_i2	2.86862	3.09334e-12
HOST_DN79637_c4_g3_i1	2.86641	1.37384e-10
HOST_DN76277_c1_g2_i1	2.86544	2.20103e-27	Arginase-2, mitochondrial	Q58DL1; A2VEA1
HOST_DN80135_c7_g6_i1	2.86518	3.20032e-15
HOST_DN68158_c0_g1_i1	2.86402	1.84543e-52	Vascular endothelial growth factor A-A	O73682; B3DG34; O73822
HOST_DN76274_c1_g4_i2	2.85532	2.00351e-15
HOST_DN79872_c10_g1_i1	2.85525	2.10058e-15	Acidic amino acid decarboxylase GADL1	Q80WP8; Q9CTD2
HOST_DN79444_c0_g1_i2	2.85516	6.62627e-48
HOST_DN78034_c3_g3_i1	2.84721	3.27341e-59	Latexin	Q9BS40; Q96PN2; Q9NQS6
HOST_DN67725_c1_g1_i1	2.84633	1.27346e-16
HOST_DN68679_c0_g3_i1	2.84488	1.079e-07	D(1) dopamine receptor	P35406
HOST_DN66566_c0_g1_i1	2.83486	4.13937e-33	Leukotriene B4 receptor 1	Q15722; Q13305; Q53XV5; Q92641; Q9BSU5
HOST_DN68475_c0_g1_i2	2.82946	3.93177e-19	Epigen	Q5EG71
HOST_DN76931_c0_g1_i1	2.82343	6.06369e-72	Hephaestin-like protein 1	Q6MZM0; Q3C1W7
HOST_DN76217_c2_g2_i2	2.8199	6.52831e-07	Leucine-rich repeat-containing protein 15	Q8TF66; Q495Q6; Q7RTN7
HOST_DN79621_c1_g5_i1	2.81651	4.97326e-22	Complement factor H	Q28085; Q3MHF3; Q9TQZ7
HOST_DN76254_c0_g5_i1	2.8102	1.46063e-31	Plexin-B1	O43157; A6H8Y2; Q6NY20; Q9UIV7; Q9UJ92; Q9UJ93
HOST_DN68199_c0_g5_i1	2.80986	7.74936e-10	XK-related protein 7	Q5GH64; A2ATH3
HOST_DN74819_c1_g1_i1	2.80783	7.81002e-44
HOST_DN77899_c2_g2_i2	2.80218	1.35132e-16	Prostacyclin synthase {ECO:0000303|PubMed:18032380}	F1RE08; A1XBQ5; A9LLA5
HOST_DN71371_c0_g1_i1	2.80091	0.000341061
HOST_DN74631_c6_g1_i1	2.79847	2.22541e-33	Protein FAM110B	Q4QRD7
HOST_DN28969_c0_g2_i1	2.78228	1.18766e-17	Cyclic GMP-AMP synthase {ECO:0000303|PubMed:23258413}	Q8C6L5; Q3ULW3
HOST_DN75929_c4_g1_i2	2.77933	3.93899e-32	Coagulation factor V	O88783; Q3UTQ2; Q3UV80
HOST_DN68347_c0_g1_i5	2.77819	5.19142e-11	Regulator of G-protein signaling 2	Q3S853; Q2V8V0
HOST_DN77237_c0_g1_i3	2.77612	2.22541e-49	Sulfide:quinone oxidoreductase, mitochondrial {ECO:0000305}	Q9Y6N5; Q9UQM8
HOST_DN76029_c0_g1_i1	2.77239	2.00343e-37	Isopentenyl-diphosphate Delta-isomerase 1	O35586
HOST_DN75106_c2_g1_i2	2.77228	1.88663e-38	Fibroleukin	Q14314
HOST_DN25016_c0_g1_i1	2.76284	3.21039e-10
HOST_DN78082_c2_g2_i1	2.76159	2.30087e-16
HOST_DN71973_c0_g1_i3	2.76149	1.62033e-75
HOST_DN80526_c4_g1_i2	2.76142	4.06392e-43	Bifunctional 3'-phosphoadenosine 5'-phosphosulfate synthase 2	O95340; Q9BZL2; Q9P0G6; Q9UHM1; Q9UKD3; Q9UP30
HOST_DN71226_c0_g3_i2	2.75681	8.98081e-30	DENN domain-containing protein 4C	Q9H6N4; Q9NUT1; Q9NWA5; Q9NWT3; R4GN35; R4GNB2
HOST_DN80854_c1_g1_i8	2.75649	8.65479e-16
HOST_DN78539_c1_g6_i1	2.75623	2.93473e-71	Mitoferrin-2	Q7T292
HOST_DN60282_c0_g2_i1	2.75378	2.44012e-07	Pyrokinin-1 receptor {ECO:0000303|PubMed:16054112}	Q8ITC9; Q0IGX8; Q71RH8
HOST_DN75961_c1_g6_i2	2.75313	6.12097e-28	D-dopachrome decarboxylase	Q28J83
HOST_DN77889_c4_g1_i2	2.75119	4.39107e-09	Cartilage matrix protein	P05099
HOST_DN77195_c3_g3_i1	2.74822	4.35636e-19	Latent-transforming growth factor beta-binding protein 2	O35806
HOST_DN78268_c1_g1_i1	2.74244	2.54202e-14
HOST_DN71731_c0_g1_i1	2.7371	6.05712e-08	Thrombomodulin	Q71U07
HOST_DN70572_c0_g1_i1	2.73104	1.08148e-16	Sigma intracellular receptor 2 {ECO:0000250|UniProtKB:Q5BJF2}	Q6DFQ5
HOST_DN74850_c3_g1_i8	2.73068	3.18298e-09	Putative L-aspartate dehydrogenase	Q66I59
HOST_DN74596_c2_g4_i1	2.72853	3.07033e-116	AT-rich interactive domain-containing protein 3A	Q5XGD9
HOST_DN71254_c0_g1_i2	2.72838	3.4967e-09	La-related protein 6	Q9BRS8; Q5XKE4; Q8N3N2; Q9NUR0
HOST_DN67725_c1_g2_i1	2.72739	4.56235e-14	Cyclic GMP-AMP synthase {ECO:0000303|PubMed:23258413}	Q8C6L5; Q3ULW3
HOST_DN81280_c2_g2_i1	2.71794	5.3224e-09	Cartilage-associated protein	Q9CYD3; O88698; Q8C8C5
HOST_DN1981_c0_g1_i1	2.71469	1.4145e-09
HOST_DN71446_c2_g1_i1	2.69958	9.34873e-22	Semaphorin-4B	Q9NPR2; Q6UXE3; Q8WVP9; Q96FK5; Q9C0B8; Q9H691; Q9NPM8; Q9NPN0
HOST_DN75276_c1_g1_i1	2.69563	5.08221e-52	Fructose-bisphosphate aldolase C-B	Q8JH70
HOST_DN75954_c1_g1_i14	2.69453	1.38872e-43	Arrestin domain-containing protein 3	Q0VCA2
HOST_DN75611_c5_g4_i1	2.69449	8.40825e-07	Protein FAM131A	Q8BWU3; Q99KY5
HOST_DN40967_c0_g1_i1	2.68892	2.48938e-09
HOST_DN5038_c0_g1_i1	2.68856	1.21032e-33	Tyrosine-protein kinase STYK1	Q6J9G0; B2R9T2; Q52LR3; Q9BXY2; Q9NSH1
HOST_DN70379_c0_g1_i4	2.68751	3.04114e-11	Uromodulin-like 1	Q5DID0; C9JCE6; Q5DIC9; Q6LA40; Q6LA41; Q8N216
HOST_DN76651_c4_g2_i2	2.68467	4.00743e-42
HOST_DN73234_c0_g1_i2	2.68246	3.78305e-78	Na(+)/H(+) exchange regulatory cofactor NHE-RF1	Q28619
HOST_DN79857_c3_g1_i6	2.68194	2.31877e-24	Putative aminopeptidase W07G4.4	Q27245
HOST_DN78229_c5_g1_i3	2.68015	9.67016e-100
HOST_DN79350_c4_g1_i2	2.67989	1.57628e-24	Centriolar coiled-coil protein of 110 kDa	O43303; B7WP23; O43335; Q68DV9; Q8NE13
HOST_DN70876_c1_g1_i1	2.67688	5.4278e-69	Proline-rich transmembrane protein 1	Q96NQ8
HOST_DN34692_c0_g1_i1	2.6729	4.39384e-08
HOST_DN72227_c0_g1_i2	2.66087	3.30399e-24	Diphosphomevalonate decarboxylase	Q5U403
HOST_DN80280_c6_g1_i5	2.65612	1.30409e-51	Uncharacterized protein KIAA1211-like	Q6NV74
HOST_DN74447_c6_g2_i3	2.65167	1.29976e-14	Transgelin	P19966
HOST_DN139220_c0_g1_i1	2.6513	3.15302e-26	Tripartite motif-containing protein 29	Q14134; Q96AA9; Q9BZY7
HOST_DN79190_c4_g1_i1	2.65122	2.99427e-31
HOST_DN75320_c3_g2_i1	2.65054	6.53061e-10	Excitatory amino acid transporter 3	Q95135
HOST_DN78265_c3_g2_i2	2.64959	1.27442e-48	HERV-H LTR-associating protein 2	Q9UM44; B4DKN2; D3DN60; Q9NWQ6
HOST_DN80636_c3_g4_i1	2.64575	6.99752e-37	Patatin-like phospholipase domain-containing protein 2	P0C548
HOST_DN76022_c3_g1_i2	2.6433	2.97594e-14	Transcription activator BRG1	A7Z019
HOST_DN79648_c4_g1_i10	2.64181	9.47044e-34	Integrin beta-8	P26012; A4D133; B4DHD4
HOST_DN80220_c0_g1_i5	2.64052	9.53498e-06	Low-density lipoprotein receptor-related protein 2 {ECO:0000303|PubMed:9228033}	C0HL13
HOST_DN76367_c2_g1_i7	2.63131	1.31728e-54	Sterol 26-hydroxylase, mitochondrial	P17178; Q64615; Q64639
HOST_DN73770_c0_g1_i1	2.62644	1.4264e-13	Coiled-coil domain-containing protein 177	Q9NQR7; B2R5G1; Q2M359
HOST_DN75387_c3_g1_i5	2.61298	2.29213e-50	Probable phosphatase phospho1	Q6DBV4
HOST_DN73924_c0_g1_i2	2.61116	6.58531e-49	TNFAIP3-interacting protein 2	Q99JG7; Q3TVF3
HOST_DN79880_c0_g1_i7	2.6082	0.000209819	RNA-binding protein 44	B0S6S9
HOST_DN78240_c2_g2_i1	2.59589	1.31811e-56
HOST_DN78422_c1_g1_i2	2.59525	5.35598e-15
HOST_DN74638_c1_g4_i1	2.59291	1.02365e-29
HOST_DN76700_c3_g3_i3	2.59269	1.81991e-07	Low density lipoprotein receptor adapter protein 1-B {ECO:0000305}	Q67FQ3; Q6NTZ2
HOST_DN65408_c0_g1_i1	2.59191	2.95914e-32	Glutathione peroxidase 1	Q8MJ14
HOST_DN66451_c0_g1_i1	2.58938	4.50165e-10
HOST_DN77563_c0_g1_i4	2.58732	5.93402e-25	Proline-rich transmembrane protein 3	Q6PE13
HOST_DN79941_c3_g1_i1	2.58721	5.03093e-64	Acetoacetyl-CoA synthetase	A3QK15; Q7ZU87
HOST_DN70206_c0_g1_i1	2.58703	1.2112e-39	Glucose-induced degradation protein 4 homolog	Q9CPY6; Q3TP79; Q7TT31; Q99JE9
HOST_DN42607_c0_g1_i1	2.5858	2.90617e-08
HOST_DN71203_c0_g1_i1	2.58494	7.53291e-21	HIG1 domain family member 1A, mitochondrial	Q9JLR9
HOST_DN80464_c0_g1_i2	2.57555	5.7453e-50	Extracellular serine/threonine protein kinase FAM20C {ECO:0000305}	Q5MJS3; Q4FJP0; Q571A3; Q6PKA8; Q8JZP7
HOST_DN79511_c1_g3_i1	2.57503	1.14676e-63	Transferrin receptor protein 1	Q9GLD3
HOST_DN80472_c1_g1_i7	2.56951	1.05802e-09	Dynein regulatory complex subunit 2 {ECO:0000303|PubMed:24094744}	Q6DHI2; Q7ZZA2
HOST_DN69841_c0_g1_i1	2.5674	3.67481e-34	Tripartite motif-containing protein 3	Q9R1R2; Q3UMU5
HOST_DN77931_c0_g2_i8	2.56667	1.23655e-06	Histidine ammonia-lyase	P21213; Q5EBB8
HOST_DN68395_c0_g1_i1	2.5604	6.90803e-06	Histamine H3 receptor	Q9JI35; Q9JI36
HOST_DN72847_c0_g2_i3	2.55961	2.69053e-48	Inositol-3-phosphate synthase 1-A	Q7ZXY0
HOST_DN72931_c0_g1_i5	2.55644	8.91449e-28
HOST_DN78826_c1_g2_i1	2.55569	4.20125e-52	Cytochrome b-245 heavy chain	P04839; A8K138; Q2PP16
HOST_DN79305_c3_g1_i2	2.54926	2.02905e-21	3-keto-steroid reductase	O88736; Q8K5C9; Q921L1
HOST_DN74765_c2_g1_i1	2.54852	9.59098e-06	Claudin-22	Q8N7P3
HOST_DN138103_c0_g1_i1	2.54591	9.78655e-08	Fucolectin-5	Q9I927
HOST_DN74393_c0_g1_i6	2.54411	8.75454e-18	cGMP-dependent protein kinase 1	P0C605; Q14DK6; Q9Z0Z0
HOST_DN101739_c0_g1_i1	2.54294	3.58686e-18	Hexokinase-1	P05708
HOST_DN69464_c0_g1_i1	2.54278	5.76141e-11	Placenta growth factor	P49763; Q07101; Q9BV78; Q9Y6S8
HOST_DN95371_c0_g1_i1	2.53758	1.02859e-20	Tyrosine-protein kinase STYK1	Q6J9G0; B2R9T2; Q52LR3; Q9BXY2; Q9NSH1
HOST_DN77991_c0_g1_i1	2.53662	1.8023e-10	Salivary glue protein Sgs-4	Q9W4T2
HOST_DN80987_c2_g3_i1	2.53625	6.66347e-34	Mitogen-activated protein kinase kinase kinase kinase 4	P97820
HOST_DN75251_c2_g3_i1	2.53577	3.84714e-05
HOST_DN80313_c0_g1_i1	2.52093	5.18248e-41	Zinc finger and BTB domain-containing protein 21	Q9ULJ3; Q5R2W1; Q5R2W2; Q6P4R0
HOST_DN71326_c0_g1_i1	2.50917	2.21496e-10	Wiskott-Aldrich syndrome protein family member 3	Q9UPY6; O94974; Q86VQ2
HOST_DN75859_c2_g2_i2	2.50855	3.95239e-26	Sarcolemmal membrane-associated protein	Q9Y681
HOST_DN70417_c1_g1_i1	2.50832	2.18702e-32	Purine nucleoside phosphorylase	P55859; Q3ZBH6; Q58DQ2
HOST_DN79410_c2_g8_i1	2.50816	7.29833e-11	Unconventional myosin-X	F8VQB6; Q8R3S0; Q9JJY5
HOST_DN801_c0_g2_i1	2.50511	2.98812e-11
HOST_DN80982_c1_g1_i1	2.505	3.30875e-54
HOST_DN55942_c0_g1_i1	2.48955	0.00056248	Gag-Pol polyprotein	P21414
HOST_DN72170_c0_g1_i3	2.4881	1.44818e-19	Tumor necrosis factor ligand superfamily member 14	O43557; A8K7M2; C9J5H4; O75476; Q6FHA1; Q8WVF8; Q96LD2
HOST_DN67956_c1_g1_i2	2.48347	4.10105e-11	Cytoskeleton-associated protein 2-like	Q8IYA6; A8K915; B4DZE3; B7ZAC6; F5H0M5; Q53QF8; Q53RS8; Q8N1J8
HOST_DN74356_c2_g1_i2	2.48162	6.39971e-19	ORM1-like protein 3	Q5XJR6
HOST_DN73335_c0_g1_i2	2.48094	1.28021e-27	Protein phosphatase Slingshot homolog 1	Q76I79; Q3TDG3; Q69ZM4; Q811E5
HOST_DN74066_c0_g1_i4	2.48012	1.8299e-19	RING finger protein 212B	Q5RBV9
HOST_DN74895_c0_g4_i1	2.47861	7.56559e-18	Claudin-4 {ECO:0000303|PubMed:20921420}	O35054
HOST_DN71446_c1_g1_i1	2.47632	8.437e-51	Semaphorin-4B	Q62179; Q4PKI6; Q69ZB7
HOST_DN72498_c0_g1_i1	2.46969	2.04541e-10	Bisphosphoglycerate mutase	Q4R6L7
HOST_DN81420_c3_g1_i3	2.46711	2.77741e-44	Organic solute transporter subunit alpha	Q66I08
HOST_DN70141_c0_g5_i1	2.46168	1.53148e-34	Long-chain-fatty-acid--CoA ligase 4	O60488; D3DUY2; O60848; O60849; Q5JWV8
HOST_DN81089_c5_g2_i12	2.46161	9.11561e-65	Formin-like protein 2	Q96PY5; B2RZH5; Q14CC9; Q4ZG52; Q8N3E0
HOST_DN75120_c0_g1_i3	2.45628	2.77838e-08
HOST_DN71062_c0_g1_i6	2.45513	2.42626e-21	Glutamine synthetase	Q8HZM5; Q8HZM4
HOST_DN78748_c6_g2_i1	2.45407	5.40003e-08	ADM	P43145
HOST_DN78611_c2_g3_i1	2.45149	6.04069e-46	Ras-related protein Rab-20	Q9NX57; Q5T9X5; Q9NX49
HOST_DN77684_c1_g1_i1	2.45009	5.15518e-32	Ataxin-1	P54254; Q8C866
HOST_DN68823_c0_g1_i1	2.44718	8.59069e-44	Persulfide dioxygenase ETHE1, mitochondrial	Q9DCM0; Q9ESL5
HOST_DN80532_c4_g1_i1	2.44349	6.26465e-33	Lathosterol oxidase	O88822; Q8BGI0
HOST_DN76298_c2_g1_i4	2.44318	1.08941e-72
HOST_DN68082_c0_g1_i1	2.44027	5.17008e-07	Janus kinase and microtubule-interacting protein 3	Q5DTN8; Q0VDR4; Q0VDR5; Q9CU41
HOST_DN80703_c2_g3_i9	2.44004	7.6844e-08
HOST_DN72671_c0_g1_i1	2.43635	9.10056e-22	Cartilage intermediate layer protein 1	O75339; B2R8F7; Q6UW99; Q8IYI5
HOST_DN77956_c3_g1_i2	2.43634	6.04905e-48	Sodium/potassium-transporting ATPase subunit alpha-1	Q9YH26
HOST_DN76768_c1_g1_i3	2.43136	6.92121e-74	Bcl-2-like protein 1	O77737
HOST_DN74609_c1_g4_i1	2.42907	1.18721e-06	HORMA domain-containing protein 1	D3ZWE7; D3ZZR2
HOST_DN79875_c3_g3_i6	2.42854	5.5765e-49	Histone deacetylase 7	Q96K01; Q9BR73; Q9H7L0; Q9NW41; Q9NWA9; Q9NYK9; Q9UFU7
HOST_DN72727_c1_g2_i8	2.42677	1.57752e-43	UDP-N-acetylglucosamine/UDP-glucose/GDP-mannose transporter	Q5RDC9
HOST_DN78489_c1_g1_i2	2.42619	4.86433e-61
HOST_DN78582_c0_g1_i1	2.42485	7.46694e-14	X-linked retinitis pigmentosa GTPase regulator	Q9R0X5; A2ADP3; G9BBQ2; O88408; Q9CU92
HOST_DN71277_c0_g1_i1	2.42481	7.40494e-10	F-box and leucine-rich protein 22	Q8C7B6; Q8C3G3; Q8C3V6
HOST_DN75201_c0_g1_i4	2.42069	0.000584211	Sodium/nucleoside cotransporter 1	O62667
HOST_DN163371_c0_g1_i1	2.41982	2.92995e-15
HOST_DN80345_c3_g1_i2	2.41879	7.52577e-37	Bridging integrator 2	Q68FR2
HOST_DN77464_c1_g3_i4	2.41714	1.38041e-84	Spartin {ECO:0000305}	Q8N0X7; O60349; Q86Y67; Q9H1T2; Q9H1T3
HOST_DN80135_c7_g1_i1	2.41687	3.21485e-48	Protein LBH	Q5RD13
HOST_DN78519_c2_g1_i2	2.41565	1.2759e-08	Ileal sodium/bile acid cotransporter	P70172; Q8VI83; Q925U7
HOST_DN76831_c2_g2_i2	2.4141	1.49832e-73	Acetyl-coenzyme A synthetase, cytoplasmic	Q9NR19; A6NE90; Q5QPH2; Q5QPH3; Q8N238; Q96EL0; Q9NQP7; Q9UJ15
HOST_DN72711_c0_g1_i1	2.41207	0.000192173	RELT-like protein 2	Q2KI80
HOST_DN71063_c0_g1_i2	2.40851	5.60084e-25	DNA damage-inducible transcript 4-like protein	Q20A00
HOST_DN76784_c2_g2_i1	2.40846	2.00701e-31
HOST_DN76539_c0_g1_i1	2.40624	1.6885e-06	Anosmin-1 {ECO:0000303|PubMed:8832397, ECO:0000312|HGNC:HGNC:6211}	P23352; B2RPF8
HOST_DN75148_c2_g1_i7	2.4052	3.61308e-21	LMBR1 domain-containing protein 2-B	Q6P4P2
HOST_DN19125_c0_g1_i1	2.4034	1.81254e-05	CKLF-like MARVEL transmembrane domain-containing protein 8	Q8IZV2; A5D6I7; Q8IW01
HOST_DN82194_c0_g1_i1	2.39688	0.000275707
HOST_DN74366_c6_g3_i1	2.38424	0.00011571	Neutral ceramidase	Q5W7F1
HOST_DN80291_c3_g1_i1	2.3803	3.28998e-12	Gamma-aminobutyric acid receptor subunit pi	Q5EA06
HOST_DN69064_c0_g1_i1	2.38012	3.70016e-10	Transmembrane protein 178B	H3BS89
HOST_DN76628_c1_g1_i5	2.37882	8.52937e-06
HOST_DN76990_c1_g4_i1	2.37704	0.000106738
HOST_DN79745_c2_g4_i1	2.37575	1.70099e-34	Unconventional myosin-Ig	Q5ZMC2
HOST_DN157817_c0_g1_i1	2.37378	4.61102e-06	Unconventional myosin-X	F8VQB6; Q8R3S0; Q9JJY5
HOST_DN77495_c1_g1_i1	2.37216	9.12945e-07	Tudor domain-containing protein 6 {ECO:0000305}	P61407
HOST_DN79122_c6_g2_i1	2.37014	1.76691e-56	Glycerol-3-phosphate acyltransferase 3-like	A3KGT9
HOST_DN73606_c0_g1_i2	2.36954	2.01287e-15	Laminin subunit beta-3	Q13751; D3DT88; O14947; Q14733; Q9UJK4; Q9UJL1
HOST_DN77519_c4_g7_i1	2.36712	9.19892e-34	Four and a half LIM domains protein 3	Q3ZBI6
HOST_DN66354_c0_g1_i1	2.36258	1.14436e-18	Interleukin-24	Q925S4; Q925J3
HOST_DN77260_c1_g2_i1	2.36003	1.22782e-07
HOST_DN69763_c0_g1_i1	2.35454	1.54484e-06
HOST_DN81407_c18_g3_i2	2.35423	9.59101e-34	Carboxylesterase 5A	Q8I034
HOST_DN79283_c1_g2_i1	2.35104	7.7215e-07	Solute carrier family 22 member 6	O57379
HOST_DN81364_c5_g2_i1	2.35013	5.22892e-44	Sodium/potassium-transporting ATPase subunit alpha-1	Q9YH26
HOST_DN81344_c1_g1_i1	2.34941	1.55284e-07
HOST_DN46929_c0_g1_i1	2.34848	2.44919e-07	Prosaposin receptor GPR37	O15354; A4D0Y6; O00348; O14768; Q8TD39
HOST_DN78815_c3_g2_i1	2.34188	1.07079e-94	Glycogen phosphorylase, brain form {ECO:0000303|PubMed:3346228}	P11216; Q96AK1; Q9NPX8
HOST_DN74595_c5_g1_i1	2.3384	2.04053e-07
HOST_DN71609_c0_g2_i2	2.33502	7.16696e-24	Excitatory amino acid transporter 1 {ECO:0000303|PubMed:9425012}	O57321
HOST_DN78227_c2_g1_i1	2.33275	0.00068751
HOST_DN59193_c0_g1_i1	2.33268	5.21431e-05	Receptor-type guanylate cyclase gcy-20 {ECO:0000305}	O62179
HOST_DN39580_c0_g2_i1	2.33082	8.15693e-13	Chitin synthase {ECO:0000303|PubMed:11589574}	Q8T5G8
HOST_DN57417_c0_g1_i1	2.32968	0.000554974	Tumor necrosis factor-inducible gene 6 protein	P98065
HOST_DN71540_c0_g1_i2	2.32568	6.32265e-21	Heat shock protein HSP 90-alpha	P07900; A8K500; B3KPJ9; Q2PP14; Q5CAQ6; Q5CAQ7; Q9BVQ5
HOST_DN72796_c0_g1_i2	2.31912	5.20889e-09	B-cell receptor CD22	P35329; Q9JHL2; Q9JJX9; Q9JJY0; Q9JJY1; Q9R056; Q9R094; Q9WU51
HOST_DN72071_c0_g1_i1	2.31753	3.93456e-10	Lipopolysaccharide-induced tumor necrosis factor-alpha factor homolog	Q8QGW7
HOST_DN81117_c4_g2_i1	2.31706	3.79503e-47
HOST_DN77014_c1_g1_i1	2.31606	2.24479e-49
HOST_DN78848_c5_g1_i1	2.3136	1.30132e-07	Retinol dehydrogenase 10	Q8VCH7; Q8CJ68
HOST_DN75445_c1_g1_i3	2.30985	1.55734e-49	Protein NDRG1	Q66IG4
HOST_DN130487_c0_g1_i1	2.30961	1.33151e-10
HOST_DN66997_c0_g1_i1	2.3096	1.13247e-31	Macrophage-stimulating protein receptor	Q62190; E9QMZ4; Q62555
HOST_DN15516_c0_g1_i1	2.29956	0.000594198	Gag-Pol polyprotein	O92815
HOST_DN71270_c0_g1_i10	2.29882	1.79798e-120	Ferritin, heavy subunit	P49946
HOST_DN79941_c5_g1_i2	2.29703	8.07142e-10	U7 snRNA-associated Sm-like protein LSm11	Q7T076
HOST_DN42183_c0_g1_i1	2.29434	2.11268e-05	Ryanodine receptor 1	F1LMY4; O35208; Q9R1G1; Q9R272
HOST_DN76313_c1_g2_i1	2.29419	4.95124e-05	DOMON domain-containing protein FRRS1L	D3ZE85
HOST_DN73997_c0_g3_i3	2.29099	1.67084e-29	DnaJ homolog subfamily A member 4	Q9JMC3; B2RW09; Q543S9; Q9CTD6; Q9CUD4
HOST_DN74985_c2_g2_i3	2.28792	6.23597e-12	RUN domain-containing protein 3A	A7YDW0; Q7ZT23
HOST_DN80002_c2_g1_i2	2.28763	3.48684e-07	Protein c-ets-1-B	P18756
HOST_DN75971_c5_g3_i1	2.28539	5.9523e-50	AT-rich interactive domain-containing protein 5B	Q8BM75; E9Q523; Q8C0E0; Q8K4G8; Q8K4L9; Q9CU78; Q9JIX4
HOST_DN76667_c0_g1_i2	2.28528	3.93489e-61	Formin-like protein 2	A2APV2; A2AQW1; Q69Z73; Q7TPA8; Q80VH6
HOST_DN77999_c4_g2_i5	2.28436	1.34114e-25	Vascular endothelial growth factor A-A	O73682; B3DG34; O73822
HOST_DN80987_c2_g4_i1	2.28281	2.75555e-29	Traf2 and NCK-interacting protein kinase	P83510
HOST_DN79015_c5_g4_i1	2.27654	1.50356e-20	Heat shock protein HSP 90-alpha 1	Q90474; Q5RG13; Q6DI33
HOST_DN80416_c2_g1_i3	2.27591	2.81216e-22	Synaptotagmin-like protein 3	Q99N48; Q3KQQ0; Q8C506; Q99N47; Q99N49; Q99N54; Q99N79
HOST_DN78142_c1_g1_i2	2.27382	6.52173e-57	Ceramide glucosyltransferase	O88693; A2AN90
HOST_DN75184_c2_g1_i1	2.27149	1.76663e-40	Tropomyosin alpha-4 chain	P09495
HOST_DN80360_c0_g1_i2	2.26864	8.22955e-14	Afadin- and alpha-actinin-binding protein	H2MTR9
HOST_DN77420_c11_g1_i1	2.26524	9.57576e-15
HOST_DN69416_c0_g1_i1	2.25995	8.07517e-09	Interleukin-1 receptor type 2	Q29612
HOST_DN74129_c4_g6_i2	2.25958	2.2566e-40	Monocyte to macrophage differentiation factor {ECO:0000250|UniProtKB:Q15546}	Q719N3
HOST_DN73600_c0_g1_i4	2.25576	8.49699e-21	Endothelial lipase	Q9Y5X9; B0LPG6; Q6P9C8; Q6UW82
HOST_DN78218_c3_g1_i1	2.25541	2.14582e-18
HOST_DN75695_c5_g8_i1	2.25412	2.93616e-66	Citrate synthase, mitochondrial	Q6S9V8
HOST_DN73307_c1_g1_i7	2.25252	2.41687e-46	Sodium/potassium-transporting ATPase subunit alpha-1	Q9YH26
HOST_DN73048_c0_g1_i2	2.25162	1.00177e-05	Forkhead box protein H1	O75593; D3DWM4
HOST_DN77079_c5_g1_i1	2.25157	7.41666e-37	Lysophosphatidylcholine acyltransferase 2	Q502J0
HOST_DN81280_c2_g1_i1	2.25055	3.26579e-11	Endoplasmic reticulum protein SC65 {ECO:0000303|PubMed:23959653}	Q8K2B0
HOST_DN62220_c0_g1_i1	2.24968	2.723e-10	Lysozyme C	P00708
HOST_DN77966_c0_g1_i2	2.24842	2.55649e-23	RAS guanyl-releasing protein 1	Q9Z1S3; Q3URH0; Q3V401; Q8BQP6
HOST_DN80095_c0_g1_i1	2.24818	1.27432e-61	Disintegrin and metalloproteinase domain-containing protein 28	Q9UKQ2; B2RMV5; Q9Y339; Q9Y3S0
HOST_DN68533_c0_g1_i1	2.24628	7.77186e-16
HOST_DN74527_c0_g1_i1	2.24494	6.13594e-26
HOST_DN56792_c0_g1_i1	2.24329	1.9724e-08
HOST_DN74630_c2_g1_i1	2.24326	2.29323e-54	Monocarboxylate transporter 1	Q3MHW6
HOST_DN75780_c6_g2_i1	2.2406	1.12593e-19	Type-2 angiotensin II receptor	P35374
HOST_DN80646_c3_g1_i2	2.23931	3.28547e-16	DNA polymerase III PolC-type {ECO:0000255|HAMAP-Rule:MF_00356}	A5IJJ8
HOST_DN70555_c0_g2_i5	2.23752	8.54282e-23	Sulfotransferase 1C1	Q80VR3; O70262
HOST_DN78327_c0_g1_i1	2.23736	4.59933e-67	Prenylcysteine oxidase	Q95KC9
HOST_DN72016_c0_g2_i1	2.23548	7.93028e-53	Ferritin, heavy subunit	P49946
HOST_DN62088_c0_g1_i1	2.23169	5.03653e-05
HOST_DN71143_c0_g1_i2	2.22969	1.29207e-06	Tropomodulin-4	Q0VC48
HOST_DN76155_c2_g1_i7	2.22967	0.00027649	Ankyrin-1	Q8N604; Q99407
HOST_DN74996_c0_g1_i2	2.22865	7.15079e-45
HOST_DN132557_c0_g1_i1	2.22863	3.42988e-07	Unconventional myosin-X	D3ZJP6
HOST_DN69249_c0_g1_i1	2.22765	1.54887e-12	Sodium/myo-inositol cotransporter	P31637
HOST_DN75584_c4_g1_i2	2.22699	3.15841e-27	Arrestin domain-containing protein 3	Q7TPQ9; Q4KMN0; Q80TE6; Q8K0L7
HOST_DN81364_c6_g2_i1	2.22534	7.39232e-45	Sodium/potassium-transporting ATPase subunit alpha-1	Q9YH26
HOST_DN80865_c5_g2_i1	2.22086	2.42646e-09	Gap junction gamma-1 protein	P36383; B3KW68; Q4VAY0
HOST_DN70981_c0_g1_i2	2.21858	9.07876e-30	Coiled-coil-helix-coiled-coil-helix domain-containing protein 10, mitochondrial	Q8WYQ3; A8K0J5
HOST_DN72579_c2_g1_i1	2.21822	3.46861e-23
HOST_DN78706_c1_g1_i7	2.21645	8.36992e-20
HOST_DN59474_c0_g2_i1	2.21291	3.998e-37	Glycerophosphodiester phosphodiesterase domain-containing protein 5	Q3KTM2
HOST_DN74788_c0_g1_i3	2.21112	4.02858e-57	Macrophage-stimulating protein receptor	Q62190; E9QMZ4; Q62555
HOST_DN75917_c3_g2_i2	2.21015	1.60126e-35	Transketolase	P29401; A8K089; B4DE31; E7EPA7; Q8TBA3; Q96HH3
HOST_DN79549_c7_g1_i1	2.20721	2.33695e-51	Fructose-1,6-bisphosphatase 1	P00636
HOST_DN78429_c1_g1_i4	2.20715	2.00979e-37	Transmembrane protein 150A	Q28BP2
HOST_DN78399_c3_g5_i2	2.2066	4.12515e-74	AT-rich interactive domain-containing protein 3A	Q5XGD9
HOST_DN80249_c1_g2_i1	2.20658	1.51499e-56	Krueppel-like factor 6	O35819; Q4V8M5
HOST_DN79566_c5_g4_i2	2.20457	3.67902e-22
HOST_DN74041_c0_g1_i3	2.20144	5.88334e-22	Cytochrome P450 3A40	Q98T91
HOST_DN75200_c5_g1_i3	2.19773	4.73136e-32	Mitochondrial basic amino acids transporter	Q8N8R3; A3KMR5; Q541V0
HOST_DN75584_c4_g6_i1	2.19657	1.15273e-21	Arrestin domain-containing protein 3	Q6TXF1
HOST_DN79699_c4_g1_i3	2.19538	9.33298e-09	Chondroitin sulfate proteoglycan 4	Q6UVK1; D3DW77; Q92675
HOST_DN85401_c0_g1_i1	2.19502	9.1043e-12	Unconventional myosin-X	F8VQB6; Q8R3S0; Q9JJY5
HOST_DN81417_c3_g2_i4	2.19411	0.000431753
HOST_DN78353_c5_g2_i2	2.19325	8.04904e-09
HOST_DN148322_c0_g1_i1	2.19153	0.000193377	Macrophage mannose receptor 1	Q61830; Q8C502
HOST_DN71821_c0_g1_i1	2.19085	1.85522e-09	Probable G-protein coupled receptor 75	O95800; B2RC02; Q6NWR2
HOST_DN77157_c4_g1_i4	2.19006	5.26318e-09	Transcription factor E2F5	Q15329; E9PBN9; Q16601; Q92756
HOST_DN56136_c0_g1_i2	2.18643	3.02652e-09
HOST_DN80673_c8_g1_i18	2.18319	2.62313e-37	Platelet-activating factor acetylhydrolase	Q90678
HOST_DN77597_c5_g3_i4	2.18282	1.19353e-53	S-adenosylmethionine sensor upstream of mTORC1 {ECO:0000255|HAMAP-Rule:MF_03044}	Q0P410
HOST_DN79612_c0_g6_i1	2.18266	5.6578e-12	Homeodomain-interacting protein kinase 1	Q8NEB6; Q8TBZ1
HOST_DN73087_c0_g1_i3	2.17949	5.93552e-93	CUB domain-containing protein 1	Q5U462; Q810J0; Q921M9
HOST_DN74479_c3_g1_i1	2.17867	6.84282e-14	OCIA domain-containing protein 2	Q3SYY7
HOST_DN74604_c8_g2_i4	2.17813	9.34173e-16
HOST_DN70842_c0_g1_i2	2.17264	1.51318e-53	Cytochrome b-245 light chain	Q95L73
HOST_DN77965_c9_g1_i8	2.17215	1.75556e-26
HOST_DN75387_c4_g1_i1	2.17208	6.38038e-37	Low-density lipoprotein receptor 1	Q99087
HOST_DN59474_c0_g1_i1	2.17169	1.02237e-39	Glycerophosphoinositol inositolphosphodiesterase GDPD2	Q9HCC8; B4DRH4; B4DVC9; Q9NXJ6
HOST_DN72975_c0_g2_i1	2.16996	1.04367e-05	Putative glutathione-specific gamma-glutamylcyclotransferase 2 {ECO:0000250|UniProtKB:Q8WUX2}	Q4KMJ1
HOST_DN80332_c2_g1_i1	2.16962	5.59586e-32	Influenza virus NS1A-binding protein homolog A	Q5RG82; Q6NYP3; Q7ZUZ3
HOST_DN76874_c5_g1_i3	2.16865	1.70055e-38	cAMP-specific 3',5'-cyclic phosphodiesterase 4B	P14646; Q5RKL0; Q8VD81; Q8VD82
HOST_DN81123_c4_g3_i2	2.1667	2.90279e-51	Ceramide synthase 2	Q3ZBF8
HOST_DN74210_c7_g2_i1	2.16617	4.07274e-05
HOST_DN73922_c2_g1_i1	2.16571	1.21003e-08	Ubiquitin-conjugating enzyme E2Q-like protein 1	A0PJN4; Q6PDR7
HOST_DN76429_c0_g5_i1	2.16447	1.06434e-23	Perilipin-2	Q9TUM6; Q3T0Y0
HOST_DN77674_c0_g3_i1	2.16379	1.88611e-25	Prostaglandin E2 receptor EP2 subtype	Q62928; Q547S0
HOST_DN79660_c2_g5_i4	2.16374	7.455e-68	Zinc finger SWIM domain-containing protein 5	Q9P217; Q5SXQ9
HOST_DN80459_c2_g1_i1	2.16321	6.4804e-25	Mitochondrial glutamate carrier 1	E9PP01; E9PR97; Q8TBU8
HOST_DN60975_c0_g2_i1	2.16289	1.65982e-06	Nuclear receptor subfamily 0 group B member 2	Q15466; F1D8P5; Q5QP36
HOST_DN77769_c3_g5_i7	2.15739	2.21367e-06	Glutamyl aminopeptidase	Q95334
HOST_DN70641_c0_g1_i1	2.15677	0.000220922	Hydroxycarboxylic acid receptor 3	P49019; A8K4G5; B2R830; E9PI97; Q8NGE4
HOST_DN77440_c3_g2_i1	2.15604	2.75314e-19	Runt-related transcription factor 1	Q16122; Q16284; Q16285; Q16286; Q16346; Q16347; Q92479
HOST_DN78936_c4_g1_i2	2.15167	2.15121e-34	Unconventional myosin-X	F8VQB6; Q8R3S0; Q9JJY5
HOST_DN77399_c4_g3_i1	2.15054	5.43063e-10
HOST_DN79745_c2_g2_i3	2.14966	4.72894e-62	Unconventional myosin-Ic-A	A0MP03; Q6PA28
HOST_DN79209_c0_g1_i2	2.14695	1.59097e-07
HOST_DN80435_c1_g1_i1	2.14373	3.5007e-21	Macrophage mannose receptor 1	P22897; A5PKW3; Q5VSJ2; Q5VSK2
HOST_DN74143_c1_g1_i3	2.1431	1.44833e-28	Transketolase-like protein 1	Q2NL26
HOST_DN76992_c3_g1_i1	2.13943	7.96907e-13
HOST_DN76592_c2_g1_i6	2.13867	2.23095e-29	Ectonucleotide pyrophosphatase/phosphodiesterase family member 1	P22413; Q5T9R6; Q9NPZ3; Q9P1P6; Q9UP61; Q9Y6K3
HOST_DN72665_c0_g1_i1	2.13837	1.0006e-75	Glutaredoxin-1	Q9ESH6; Q99PB7
HOST_DN76234_c4_g3_i1	2.13573	7.60842e-48	Glycerophosphoinositol inositolphosphodiesterase GDPD2	Q9HCC8; B4DRH4; B4DVC9; Q9NXJ6
HOST_DN77467_c6_g3_i1	2.13075	2.54177e-09	CCAAT/enhancer-binding protein beta {ECO:0000312|HGNC:HGNC:1834}	P17676; A8K671; Q96IH2; Q9H4Z5
HOST_DN72488_c0_g1_i1	2.1261	1.48538e-13	GTPase IMAP family member 4	Q8K3K9
HOST_DN79638_c3_g1_i1	2.12572	4.34984e-31	Choline transporter-like protein 4	Q7T2B0
HOST_DN77030_c8_g1_i4	2.12569	6.14604e-52	Mucosa-associated lymphoid tissue lymphoma translocation protein 1	Q9UDY8; Q9NTB7; Q9ULX4
HOST_DN70099_c0_g1_i1	2.12448	4.2717e-08	Somatomedin-B and thrombospondin type-1 domain-containing protein	Q32L50
HOST_DN79343_c0_g1_i4	2.12404	1.12952e-26	Mitochondrial peptide methionine sulfoxide reductase	P54149; Q3ZC16; Q5E976
HOST_DN74515_c10_g1_i1	2.11568	5.87807e-08	Photoreceptor outer segment membrane glycoprotein 2	O42282
HOST_DN64163_c0_g1_i1	2.11543	0.000280849	Calpain-1 catalytic subunit {ECO:0000305}	O35350; O88666
HOST_DN76475_c3_g1_i1	2.11094	1.56222e-10
HOST_DN74442_c2_g1_i2	2.10404	9.83964e-44	Uncharacterized protein KIAA0513	O60268; B4DSS5; D3DUM2; Q8N6G0
HOST_DN76522_c3_g2_i3	2.10189	1.21546e-42	ERO1-like protein alpha	A5PJN2
HOST_DN81364_c5_g1_i1	2.1012	2.25139e-28	Sodium/potassium-transporting ATPase subunit alpha-1	P25489
HOST_DN79828_c0_g1_i1	2.09892	0.000336858	Thymidine phosphorylase	P19971; A8MW15; H9KVA0; Q13390; Q8WVB7
HOST_DN76837_c5_g2_i1	2.09735	2.25911e-13
HOST_DN80276_c1_g3_i4	2.09709	3.13561e-06	Protein HID1	Q8IV36; Q8N5L6; Q8TE83; Q9NT34
HOST_DN55679_c0_g1_i1	2.09431	2.67929e-07
HOST_DN74974_c1_g1_i22	2.09296	1.04237e-31	Sodium- and chloride-dependent taurine transporter	Q00589
HOST_DN79443_c2_g2_i2	2.09103	3.57461e-137	Calpain-5	O08688; Q91YU0
HOST_DN128299_c0_g1_i1	2.08683	0.000120339
HOST_DN79307_c3_g2_i8	2.08537	1.64217e-30	Influenza virus NS1A-binding protein homolog A	Q5RG82; Q6NYP3; Q7ZUZ3
HOST_DN73861_c4_g1_i1	2.08193	1.43994e-10	Actin	Q11212
HOST_DN164442_c0_g1_i1	2.08128	1.14201e-05	Nuclear factor 7, ovary	Q91431; Q801R9
HOST_DN74012_c7_g3_i6	2.08062	2.83861e-07	Annexin A13	P27216; Q9BQR5
HOST_DN76441_c7_g1_i1	2.07982	2.38232e-05
HOST_DN80847_c3_g3_i1	2.07904	5.07594e-42	Matrix metalloproteinase-14	P50281; A8K5L0; Q6GSF3; Q92678
HOST_DN80643_c0_g2_i2	2.07818	1.40562e-23
HOST_DN74882_c0_g4_i2	2.07664	2.46539e-09	Protein kintoun {ECO:0000255|HAMAP-Rule:MF_03069}	B6F1W5
HOST_DN73307_c1_g2_i2	2.07356	2.48754e-31	Sodium/potassium-transporting ATPase subunit alpha-1	Q92123; Q91683; Q92127
HOST_DN77375_c0_g6_i1	2.07219	1.72397e-18
HOST_DN61971_c0_g1_i1	2.06747	0.00100713
HOST_DN74444_c6_g4_i1	2.06348	1.0821e-05	Transmembrane protein 163	A6QQX9
HOST_DN75813_c3_g2_i2	2.06326	3.53066e-19	Squalene synthase	P53798; Q8BPF5
HOST_DN77092_c2_g1_i1	2.06146	7.68769e-05
HOST_DN144992_c0_g1_i1	2.06096	8.47944e-06
HOST_DN74542_c2_g1_i1	2.06008	1.9698e-10	Tenomodulin	Q9H2S6; Q9HBX0; Q9UJG0
HOST_DN78552_c6_g2_i2	2.05927	8.40395e-50	Ras-related protein Rab-9B	Q8BHH2
HOST_DN75468_c2_g1_i1	2.05866	5.14983e-07
HOST_DN76098_c1_g1_i4	2.05689	1.33721e-15	Putative uncharacterized protein ART2	Q8TGM7
HOST_DN71091_c0_g1_i3	2.05623	3.9137e-06	Soluble guanylate cyclase 88E	Q8INF0; A2RVE6; Q0KI72; Q6U839; Q6U840; Q9VFC5
HOST_DN79574_c3_g1_i5	2.05584	6.56305e-14	Diamine acetyltransferase 1	Q8AXL1
HOST_DN80989_c0_g1_i3	2.05507	3.50825e-11	TSC22 domain family protein 3	Q9EQZ1
HOST_DN76730_c1_g9_i1	2.05412	1.0942e-83	Myeloid differentiation primary response protein MyD88	A8QMS7
HOST_DN72476_c0_g1_i1	2.05062	2.3418e-09	Kinesin-like protein KIF17	Q99PW8; A2AM73
HOST_DN72921_c0_g1_i4	2.04226	3.57126e-17	Very-long-chain (3R)-3-hydroxyacyl-CoA dehydratase {ECO:0000305}	Q7SY06; Q1LWK3
HOST_DN68165_c0_g1_i1	2.04225	7.23639e-24	C-C motif chemokine 20	O89093; Q9Z1X3
HOST_DN78566_c1_g5_i1	2.04187	7.36389e-30	Sarcoplasmic/endoplasmic reticulum calcium ATPase 2	Q03669
HOST_DN78302_c3_g4_i1	2.04018	8.84021e-05	Band 3 anion exchange protein	P32847
HOST_DN76800_c1_g1_i1	2.03904	5.10842e-06
HOST_DN80950_c0_g1_i1	2.03895	1.15324e-05	Protein AMBP	P36992
HOST_DN77552_c5_g1_i2	2.03833	1.12048e-10	Presequence protease, mitochondrial {ECO:0000305}	Q7ZVZ6
HOST_DN75377_c4_g2_i9	2.03743	1.73236e-25	5-aminolevulinate synthase, nonspecific, mitochondrial	P43091
HOST_DN79973_c0_g5_i1	2.03304	4.34111e-09
HOST_DN74143_c1_g3_i2	2.03106	6.40085e-15	Leucine-rich repeat-containing protein 23	O35125
HOST_DN74938_c3_g1_i3	2.0291	3.49049e-05
HOST_DN80856_c3_g1_i1	2.02884	3.29592e-21	Ataxin-1	Q63540
HOST_DN80830_c1_g1_i1	2.02855	1.32917e-06	GTPase IMAP family member 4	Q8K3K9
HOST_DN75387_c4_g3_i2	2.02742	1.25177e-33	Low-density lipoprotein receptor 2	Q99088
HOST_DN46948_c0_g1_i1	2.02401	1.43177e-09
HOST_DN75090_c2_g1_i3	2.02343	2.5372e-09	Protein NDRG3	A7MB28
HOST_DN74636_c1_g1_i3	2.02122	0.000104048	Coronin-6	Q920J3; Q4G087
HOST_DN76866_c2_g1_i4	2.02052	1.34077e-29	Egl nine homolog 2 {ECO:0000305}	Q96KS0; A8K5S0; Q8WWY4; Q9BV14
HOST_DN77024_c2_g7_i1	2.01895	5.36454e-36	ETS translocation variant 5	Q9CXC9; Q3TG49; Q8C0F3; Q9JHB1
HOST_DN69578_c0_g1_i3	2.01826	4.28002e-24	39S ribosomal protein L14, mitochondrial	Q7ZUH5
HOST_DN75377_c4_g3_i1	2.01821	8.68068e-24	5-aminolevulinate synthase, nonspecific, mitochondrial	P43091
HOST_DN77041_c4_g4_i2	2.01735	2.75093e-48
HOST_DN74359_c2_g1_i6	2.01486	7.007e-08	Egl nine homolog 1	P59722; Q642G6
HOST_DN76555_c0_g2_i7	2.01427	7.09131e-25
HOST_DN79021_c3_g1_i1	2.01391	5.72189e-54	Tyrosine-protein kinase transforming protein erbB	P00534
HOST_DN79127_c0_g1_i1	2.01227	1.57655e-06
HOST_DN75203_c2_g1_i2	2.00905	1.25679e-30	ATP-binding cassette sub-family F member 2	Q9UG63; O60864; Q75MJ0; Q75MJ1; Q96TE8
HOST_DN75166_c4_g2_i1	2.0088	6.55117e-40	Macrophage-capping protein	Q6AYC4
HOST_DN80624_c2_g1_i5	2.00471	7.27941e-58	Protein-tyrosine kinase 2-beta	Q14289; D3DST0; Q13475; Q14290; Q16709; Q6PID4
HOST_DN75652_c8_g1_i1	2.00456	2.22554e-13	Protein sprouty homolog 4	A2VDU1
HOST_DN80576_c3_g5_i4	2.00264	2.82272e-62	Kunitz-type protease inhibitor 1	Q9R097; Q99J04
HOST_DN79410_c2_g6_i1	2.00179	6.13377e-33	Unconventional myosin-X	Q9HD67; A7E2D1; O94893; Q8IVX5; Q9NYM7; Q9P110; Q9P111; Q9UHF6
HOST_DN70764_c0_g1_i1	2.00001	1.88517e-20	Sphingolipid delta(4)-desaturase/C4-monooxygenase DES2	Q6QHC5; Q6P492
HOST_DN73468_c0_g1_i1	1.99597	4.55161e-10
HOST_DN78903_c0_g1_i4	1.99528	2.32303e-09	Zinc finger Y-chromosomal protein	Q52V16
HOST_DN28908_c0_g1_i1	1.99416	0.000248705
HOST_DN73990_c0_g1_i1	1.99248	1.01732e-18	Transcription factor IIIB 90 kDa subunit	Q8CFK2
HOST_DN77244_c2_g5_i1	1.99237	2.36114e-05	Zinc transporter ZIP8	Q91W10; Q8BTQ3; Q8BUD6; Q9D426; Q9D5V4
HOST_DN78351_c3_g1_i2	1.99192	1.47036e-08	Choline kinase alpha	P35790; Q8NE29
HOST_DN80668_c4_g2_i4	1.99008	2.4972e-23	Rho GTPase-activating protein 4 {ECO:0000305}	P98171; Q14144; Q86UY3
HOST_DN76823_c1_g3_i2	1.98973	9.60765e-15	Laminin subunit alpha-3	Q61789; E9PUR4; O08751; Q61788; Q61966; Q9JHQ7
HOST_DN77232_c2_g1_i4	1.98443	1.46225e-07	Fc receptor-like protein 5	Q96RD9; A0N0M2; B7WNT9; B7WP94; Q495Q2; Q495Q4; Q5VYK9; Q6UY46
HOST_DN66843_c0_g1_i1	1.9827	1.76108e-14
HOST_DN25491_c0_g1_i1	1.98258	7.10707e-05
HOST_DN76174_c3_g3_i1	1.98192	9.07005e-23	Lysophosphatidic acid receptor 1	Q92633; B4DK36; O00656; O00722; P78351
HOST_DN79173_c5_g2_i6	1.97631	2.36747e-21	ETS translocation variant 5	Q9CXC9; Q3TG49; Q8C0F3; Q9JHB1
HOST_DN70735_c0_g1_i1	1.97554	2.02356e-06	Angiopoietin-2	O15123; A0AV38; A8K205; B7ZLM7; Q9NRR7; Q9P2Y7
HOST_DN75534_c4_g2_i1	1.97392	5.52404e-23	SPRY domain-containing SOCS box protein 4	Q8R5B6; Q8BJI9; Q8VHS8
HOST_DN71138_c0_g1_i5	1.97202	6.41473e-06	Protein prune homolog 2	Q0IHU9
HOST_DN79062_c2_g2_i1	1.97097	1.27525e-16	Sodium-dependent phosphate transporter 1-B	Q6PFM1
HOST_DN24284_c0_g1_i1	1.96969	7.19081e-09	Proteasome activator complex subunit 4B	F1R2X6
HOST_DN79183_c2_g7_i1	1.96534	1.08645e-17	Leukotriene B4 receptor 1	Q15722; Q13305; Q53XV5; Q92641; Q9BSU5
HOST_DN78842_c2_g2_i3	1.96523	7.42308e-21	Regulator of G-protein signaling 3	Q8WV02; Q8WXA0
HOST_DN75946_c11_g1_i2	1.96506	2.26067e-22	Axin interactor, dorsalization-associated protein	Q6PBN2
HOST_DN120364_c0_g1_i1	1.96351	9.39071e-20	Protein phosphatase PTC7 homolog	Q5U3N5
HOST_DN75557_c3_g4_i1	1.96088	2.62661e-21	Radiation-inducible immediate-early gene IEX-1	P46694
HOST_DN78432_c1_g2_i1	1.96052	3.88462e-06
HOST_DN71675_c1_g2_i1	1.96024	7.10547e-30	Ferredoxin-2, mitochondrial	Q08C57
HOST_DN69727_c0_g1_i1	1.95998	1.02946e-39	Hydroxycarboxylic acid receptor 2	Q80Z39
HOST_DN21764_c0_g1_i1	1.95944	4.31415e-07	Leucine-rich repeat-containing protein 38	A2VDH3; A2A8J4; Q3TVH8; Q8BR15
HOST_DN72553_c0_g1_i1	1.95932	3.3873e-09	Ras-related protein Rab-38	P57729; Q53XK7
HOST_DN73796_c0_g1_i14	1.95855	4.24592e-06	Fatty acid-binding protein, liver	P80856
HOST_DN79745_c1_g3_i1	1.95755	8.09013e-08	Unconventional myosin-Ih	Q8N1T3; F5H3C6
HOST_DN8222_c0_g1_i1	1.95691	0.000168953	Serine protease 27	Q6BEA2
HOST_DN77447_c5_g1_i4	1.95274	2.73508e-57	C-X-C chemokine receptor type 3	P49682; B2R982; O15185; Q7Z710; Q9P2T4; Q9P2T5
HOST_DN156241_c0_g1_i1	1.95124	1.88843e-10	Tyrosine-protein kinase transforming protein SEA	P23049; Q85458; Q85459
HOST_DN80486_c2_g1_i1	1.94755	5.34199e-29	Myeloid-associated differentiation marker homolog	Q6DFR5
HOST_DN79243_c1_g2_i3	1.94724	9.77096e-05	Solute carrier family 22 member 16	Q66KG0
HOST_DN74381_c9_g2_i3	1.94697	3.47433e-28	Sestrin-1 {ECO:0000305}	P58003; Q5D077
HOST_DN76707_c2_g6_i3	1.94491	3.41092e-23	Protein C-ets-1	P41156; Q3T1H1
HOST_DN68226_c0_g1_i1	1.94324	2.47451e-27	F-box only protein 50	Q568V3; A1L1Z5; A2BHA4; Q3B7F3; Q9PTD8
HOST_DN75662_c2_g1_i1	1.94223	1.14146e-07	Complement C1q-like protein 4	Q4ZJM9; B2RV40
HOST_DN78758_c2_g2_i15	1.93944	3.20631e-12	Cingulin-like protein 1	Q0VF96; Q05BZ4; Q52LR0; Q695C7; Q7Z2L3; Q96JV2; Q96MN6; Q9C0B4
HOST_DN75904_c2_g2_i4	1.93942	9.26762e-51	Hypoxia-inducible factor 1-alpha	Q98SW2
HOST_DN72001_c0_g1_i3	1.93804	1.41091e-09
HOST_DN76001_c3_g4_i2	1.93779	2.59108e-76	Phosphofurin acidic cluster sorting protein 1	Q8K212; Q6P5H8
HOST_DN78116_c5_g4_i1	1.93548	5.65418e-52	Matrix metalloproteinase-14	P50281; A8K5L0; Q6GSF3; Q92678
HOST_DN78767_c0_g1_i1	1.93258	0.000124672
HOST_DN66740_c1_g1_i1	1.93233	0.000107294	Ryanodine receptor 1	F1LMY4; O35208; Q9R1G1; Q9R272
HOST_DN158213_c0_g1_i1	1.93164	1.32798e-09
HOST_DN43445_c0_g1_i1	1.92811	1.44464e-18	Protein MAL2	Q969L2; B2R520; Q6ZMD9
HOST_DN77375_c0_g5_i2	1.92764	4.09566e-33	CD151 antigen	P48509; A8KAK8; E9PI15; Q14826; Q86U54; Q96TE3
HOST_DN81253_c2_g1_i1	1.92752	1.20808e-42	2-amino-3-ketobutyrate coenzyme A ligase, mitochondrial	O75600; E2QC23; Q6ZWF1; Q96CA9
HOST_DN78879_c3_g1_i3	1.92642	2.42006e-56	Galactose-specific lectin nattectin	Q66S03
HOST_DN74681_c2_g2_i1	1.92574	1.30434e-39	Immunoglobulin superfamily member 3	Q6ZQA6; A0A4X9; Q7TPV3
HOST_DN73355_c0_g2_i1	1.92217	1.52901e-20	Tumor necrosis factor ligand superfamily member 10	P50592
HOST_DN77799_c0_g2_i6	1.92151	6.1134e-37	Thioredoxin	Q9DGI3
HOST_DN81404_c1_g1_i4	1.92118	1.27745e-05	Dynein heavy chain 11, axonemal	Q96DT5; Q9UJ82
HOST_DN77229_c0_g1_i1	1.92087	1.37234e-25	Inosine-5'-monophosphate dehydrogenase 1b {ECO:0000255|HAMAP-Rule:MF_03156}	Q5RGV1
HOST_DN75493_c2_g4_i2	1.92064	6.97234e-06	Mitofusin-1	Q811U4; Q3URC4; Q811D5; Q8CEY6; Q99M10; Q9D395
HOST_DN79184_c2_g1_i3	1.91992	1.22395e-28	Aspartate--tRNA ligase, mitochondrial	Q6PI48
HOST_DN70725_c0_g1_i4	1.91938	3.41395e-39	PRELI domain-containing protein 1, mitochondrial	Q90673
HOST_DN76605_c0_g1_i10	1.91912	2.85065e-05	Matrilin-3	O42401
HOST_DN70000_c0_g1_i1	1.91854	1.40268e-14
HOST_DN80328_c0_g1_i2	1.91845	1.59828e-12	Endothelial PAS domain-containing protein 1	Q99814; Q86VA2; Q99630
HOST_DN80039_c3_g1_i1	1.91512	1.08488e-18
HOST_DN74701_c0_g1_i7	1.91505	1.29863e-10	Elongation of very long chain fatty acids protein 6 {ECO:0000255|HAMAP-Rule:MF_03206, ECO:0000305}	Q6PC64
HOST_DN77329_c4_g2_i8	1.915	6.5705e-50	Phosphatidylinositol transfer protein beta isoform	P48739; B3KYB8; B7Z7Q0; Q8N5W1
HOST_DN73440_c1_g1_i4	1.91446	7.23535e-40	Butyrophilin subfamily 3 member A2	Q76PA0; Q9BU81; Q9NR44
HOST_DN79904_c1_g2_i2	1.9125	1.36935e-29	DnaJ homolog subfamily C member 16	Q80TN4; Q811G1; Q8BHI2
HOST_DN78359_c5_g3_i3	1.91206	1.16582e-09	Uncharacterized protein C17orf62 homolog	Q6DGA7
HOST_DN78583_c2_g2_i1	1.91133	5.74262e-07	Gastrula zinc finger protein XlCGF57.1	P18729
HOST_DN75723_c3_g1_i2	1.91033	1.4949e-20	Putative ferric-chelate reductase 1	A4QP81
HOST_DN77860_c4_g3_i6	1.90606	1.05867e-36	Dedicator of cytokinesis protein 9 {ECO:0000305}	Q9BZ26; Q9BZ27; Q9BZ28; Q9UPU4
HOST_DN76528_c0_g1_i1	1.90132	5.84248e-55	Glycerol-3-phosphate acyltransferase 1, mitochondrial	P97564; O35349; P97565; P97566
HOST_DN73892_c0_g1_i2	1.90101	1.77661e-08	Claudin-34 {ECO:0000305}	H7C241
HOST_DN69773_c0_g1_i1	1.89787	5.80237e-08	Growth/differentiation factor 15 {ECO:0000305}	Q9Z0J7; Q6NX63
HOST_DN80446_c4_g6_i1	1.89759	8.56525e-17	Zinc finger BED domain-containing protein 1	O96006; Q96BY4
HOST_DN75290_c4_g1_i2	1.89734	1.66471e-50	Putative glycerol kinase 5	A0JPE9
HOST_DN71250_c0_g1_i1	1.89635	5.01849e-20	C-C motif chemokine 19	Q99731; O00697; O00736
HOST_DN77932_c4_g4_i5	1.89563	5.04482e-09
HOST_DN168918_c0_g1_i1	1.89332	3.07796e-08	Laminin subunit alpha-3	Q96TG0
HOST_DN69457_c0_g1_i1	1.89286	3.43444e-24	Protein SCO1 homolog, mitochondrial	Q5SUC9; Q3UTD6
HOST_DN77503_c0_g3_i1	1.89112	5.08745e-33	Transcription factor BTF3 homolog 4	Q6PC91
HOST_DN69814_c0_g1_i2	1.88884	1.89979e-31	Ubiquitin carboxyl-terminal hydrolase isozyme L3	Q9JKB1; Q9EQX7
HOST_DN75037_c6_g1_i1	1.88838	2.51876e-08	Protein S100-A14	Q9D2Q8; Q9D1D8
HOST_DN79773_c0_g3_i5	1.88581	5.84737e-26	Glutamine synthetase	Q8HZM5; Q8HZM4
HOST_DN74938_c3_g2_i3	1.88516	2.99877e-05	Integrin alpha-4	P13612; D3DPG4; Q7Z4L6
HOST_DN76907_c2_g2_i3	1.88419	0.000643813
HOST_DN78752_c8_g2_i3	1.88249	1.19582e-42	Very-long-chain (3R)-3-hydroxyacyl-CoA dehydratase {ECO:0000305}	Q6GNB5
HOST_DN78762_c0_g1_i1	1.88005	7.42137e-11	Cytokine-inducible SH2-containing protein	Q9PW70
HOST_DN71499_c0_g1_i1	1.87958	1.00215e-07	Midnolin	Q6NYU6
HOST_DN70719_c0_g1_i1	1.87727	3.33825e-39	Hydroxycarboxylic acid receptor 2	Q80Z39
HOST_DN76021_c9_g3_i1	1.87704	1.42157e-07
HOST_DN78851_c3_g1_i1	1.87368	2.24861e-14
HOST_DN75228_c3_g1_i1	1.87317	3.61218e-32
HOST_DN75144_c0_g2_i1	1.87257	3.13159e-21	60 kDa heat shock protein, mitochondrial	Q5ZL72; P84165
HOST_DN74664_c1_g2_i1	1.87238	4.89904e-43	Coiled-coil domain-containing protein 51	Q96ER9; Q9HA01
HOST_DN81149_c2_g1_i1	1.87153	0.000479996	Alpha-(1,3)-fucosyltransferase 7	Q11131; Q0VGH5
HOST_DN77393_c3_g2_i1	1.87149	3.83942e-18
HOST_DN76441_c3_g1_i1	1.87126	4.13748e-08	Phosphatidate phosphatase LPIN1	E7ESE7; F5GY24; Q53T25
HOST_DN79829_c11_g1_i1	1.87114	9.77609e-47	Proteasome activator complex subunit 4B	F1R2X6
HOST_DN75768_c4_g1_i1	1.86839	5.41848e-29
HOST_DN77851_c3_g1_i1	1.86802	8.73167e-36	PWWP domain-containing protein 2B	Q6NUJ5; A6NM90; B5MDQ1; H9KV61; Q5SZI0; Q6ZQX5; Q96F43
HOST_DN74471_c3_g17_i1	1.86798	2.79991e-09	7-alpha-hydroxycholest-4-en-3-one 12-alpha-hydroxylase	Q9UNU6; B2RCY3; O75958; Q6NWT2; Q6NWT3
HOST_DN75377_c3_g1_i1	1.86529	4.79355e-10	5-aminolevulinate synthase, erythroid-specific, mitochondrial	P43090
HOST_DN75167_c0_g2_i1	1.86444	3.30018e-16	Hepatic triacylglycerol lipase	P27656; Q8VC44
HOST_DN80600_c3_g10_i1	1.86404	9.01774e-30	Clathrin heavy chain 1	P49951
HOST_DN99930_c0_g1_i1	1.8638	1.8765e-21	Unconventional myosin-X	Q9HD67; A7E2D1; O94893; Q8IVX5; Q9NYM7; Q9P110; Q9P111; Q9UHF6
HOST_DN75357_c1_g2_i1	1.8634	0.000153102
HOST_DN78031_c7_g1_i1	1.86287	1.1778e-17
HOST_DN165732_c0_g1_i1	1.86217	5.66696e-05
HOST_DN79410_c2_g5_i2	1.86084	2.15268e-05	Unconventional myosin-X	Q9HD67; A7E2D1; O94893; Q8IVX5; Q9NYM7; Q9P110; Q9P111; Q9UHF6
HOST_DN76391_c3_g1_i1	1.85976	8.41228e-19	Growth factor receptor-bound protein 7	Q1RMW5
HOST_DN55218_c0_g1_i1	1.85888	0.000345904	Prostaglandin E2 receptor EP4 subtype	P43114; O08728
HOST_DN74461_c4_g2_i3	1.85791	3.95897e-24	Mitoferrin-1	Q287T7
HOST_DN79973_c0_g2_i7	1.85736	7.65565e-30	ATP-dependent 6-phosphofructokinase, platelet type {ECO:0000255|HAMAP-Rule:MF_03184}	Q01813; B3KS15; Q5VSR7; Q5VSR8
HOST_DN78755_c2_g1_i4	1.8559	5.1056e-22	Hyaluronidase-2	Q12891; B3KRZ2; O15177; Q9BW29
HOST_DN74924_c4_g4_i3	1.85523	1.12468e-56	Arf-GAP domain and FG repeat-containing protein 1	Q8K2K6; O70448; Q8BQL5; Q8CDK9
HOST_DN73319_c0_g1_i2	1.85491	1.41349e-18	Disintegrin and metalloproteinase domain-containing protein 8	P78325; B4DVM6; H0YL36; H0YLR0; H0YN39
HOST_DN80311_c3_g1_i1	1.8528	8.61473e-15
HOST_DN79363_c0_g1_i1	1.85215	4.02099e-12	Filamin A-interacting protein 1-like	A3KNA5
HOST_DN74096_c3_g2_i1	1.851	8.36049e-06	CXXC-type zinc finger protein 5	Q5XIQ3
HOST_DN77295_c3_g1_i6	1.84914	2.97816e-75	Protein kinase C and casein kinase substrate in neurons protein 2	O13154
HOST_DN78918_c1_g1_i11	1.84901	1.93513e-11	Centromere protein J	Q9HC77; Q2KHM6; Q5JPD5; Q5T6R5; Q96KS5; Q9C067
HOST_DN70040_c0_g1_i1	1.84836	1.89432e-73	Dolichyldiphosphatase 1	B2KI79
HOST_DN72347_c0_g1_i1	1.84748	4.19403e-50	Cytochrome c oxidase assembly protein COX15 homolog	Q8BJ03; Q3URB2; Q8VDN0; Q921K5
HOST_DN79141_c2_g1_i5	1.84475	4.42497e-55	Breast cancer anti-estrogen resistance protein 3	Q58DL5; Q2KJF5
HOST_DN70705_c0_g1_i1	1.84472	8.31048e-56	DnaJ homolog subfamily A member 2	Q2HJ94
HOST_DN79728_c2_g1_i1	1.84298	8.48042e-29	6-phosphogluconate dehydrogenase, decarboxylating	P52209; A8K2Y9; B4DQJ8; Q9BWD8
HOST_DN75511_c5_g2_i2	1.84294	7.10983e-27	Serine protease HTRA2, mitochondrial	A0JNK3
HOST_DN73925_c1_g2_i2	1.84071	1.71451e-12	Sodium-dependent lysophosphatidylcholine symporter 1-B	Q6DEJ6; Q1LYS0
HOST_DN76027_c0_g1_i1	1.84037	1.93508e-06
HOST_DN78430_c6_g4_i1	1.84022	0.000679373
HOST_DN79518_c3_g1_i2	1.84021	1.90955e-17
HOST_DN77485_c1_g5_i3	1.83918	3.43586e-44	Myelin protein zero-like protein 3	Q6UWV2; A8K025; B4DLD5; B4E2I8
HOST_DN80080_c1_g1_i1	1.8375	1.05108e-41
HOST_DN77529_c6_g1_i3	1.83677	9.51912e-41	Heat shock 70 kDa protein 4	P34932; O95756; Q2TAL4; Q9BUK9
HOST_DN80604_c1_g1_i2	1.83171	2.25013e-38	Eukaryotic translation initiation factor 4E-binding protein 3-like	Q98TT6
HOST_DN74918_c3_g1_i5	1.83032	4.69604e-32	LIM and senescent cell antigen-like-containing domain protein 1	P48059; B2RAJ4; B7Z483; B7Z7R3; B7Z907; Q53TE0; Q9BS44
HOST_DN78396_c1_g2_i1	1.83026	0.000533726
HOST_DN77466_c4_g2_i3	1.83017	2.83592e-23	MAGUK p55 subfamily member 6	Q9NZW5; A4D157; Q9H0E1
HOST_DN76587_c5_g2_i1	1.82943	8.39806e-25	Deubiquitinase DESI2 {ECO:0000250|UniProtKB:Q9BSY9}	Q6DC39; Q1L8W2
HOST_DN74541_c0_g3_i1	1.82599	7.58176e-35	Elongation factor G, mitochondrial {ECO:0000255|HAMAP-Rule:MF_03061}	Q08BB1
HOST_DN77485_c1_g3_i2	1.82561	2.75013e-33	Protein Smaug homolog 1	Q0IHW3
HOST_DN77757_c0_g1_i8	1.82369	4.59358e-08	High affinity choline transporter 1	Q8BGY9; Q99PK3; Q9ESW5
HOST_DN78942_c2_g1_i2	1.82366	9.70743e-18	Catechol O-methyltransferase domain-containing protein 1	Q8BIG7
HOST_DN79693_c8_g2_i1	1.8236	3.37682e-20	Jupiter microtubule associated homolog 1 {ECO:0000250|UniProtKB:Q9UK76}	Q3T0T5
HOST_DN72380_c0_g1_i2	1.82247	6.88405e-08
HOST_DN74407_c4_g1_i2	1.82236	1.9979e-18	Leukocyte elastase inhibitor	P05619
HOST_DN75680_c4_g1_i2	1.8203	2.76406e-05	Probable fructose-2,6-bisphosphatase TIGAR A {ECO:0000305}	Q29RA5
HOST_DN75312_c0_g1_i1	1.81955	2.87642e-15	CDK5 and ABL1 enzyme substrate 2	Q9BTV7; Q5JWL0; Q9BYK0
HOST_DN75043_c0_g2_i1	1.81472	4.89169e-41	Epidermal growth factor receptor	P55245; F6YXS7; G7ML99; H9FAB2
HOST_DN80240_c2_g2_i10	1.81459	6.96061e-21	Actin	Q11212
HOST_DN80889_c10_g1_i1	1.81442	2.41508e-17	Serine/threonine-protein phosphatase 2A regulatory subunit B'' subunit alpha	Q06190; A8KAE7; B4DNU1; B7ZAE3; Q06189; Q9NPQ5
HOST_DN78056_c3_g2_i7	1.81264	4.08487e-26	Ras and Rab interactor 2	Q8WYP3; Q00425; Q5TFT8; Q9BQL3; Q9H071
HOST_DN69943_c0_g1_i2	1.81259	4.08208e-14	Inactive tyrosine-protein kinase PEAK1 {ECO:0000305}	Q9H792; Q6ZS78; Q8NAZ4; Q8NCM3; Q8TEG7
HOST_DN74781_c4_g1_i4	1.81199	5.08843e-32	RAS guanyl-releasing protein 2	P0C643
HOST_DN76992_c3_g2_i6	1.81192	2.48932e-06
HOST_DN79541_c1_g1_i1	1.81129	2.94324e-05	Tubulin polyglutamylase complex subunit 1	Q6ZTW0; Q96GE2
HOST_DN70272_c0_g1_i1	1.80973	3.03182e-06
HOST_DN75394_c1_g1_i2	1.80843	2.07422e-24	Ephrin-A1	P52794
HOST_DN75218_c1_g1_i1	1.8064	1.87186e-19	Ephrin-A1	P52794
HOST_DN86024_c0_g1_i1	1.8044	1.04313e-05
HOST_DN70363_c0_g1_i3	1.80404	3.56005e-05	DNA damage-inducible transcript 4 protein	Q7T346
HOST_DN58697_c0_g1_i1	1.80388	3.51719e-06
HOST_DN73913_c0_g1_i8	1.80374	9.3479e-11	Caspase recruitment domain-containing protein 14	Q99KF0
HOST_DN79085_c0_g2_i2	1.80207	2.80498e-13
HOST_DN75520_c2_g1_i1	1.8013	2.72422e-14	Asparagine synthetase [glutamine-hydrolyzing]	Q5ZJU3
HOST_DN79710_c7_g1_i1	1.8011	1.20889e-57	Actin filament-associated protein 1-like 1	Q4V8Y7
HOST_DN75804_c2_g1_i4	1.80045	7.07437e-34	Sodium/potassium-transporting ATPase subunit beta-233	Q9I9C3
HOST_DN79660_c2_g2_i1	1.79899	9.47251e-22	Zinc finger SWIM domain-containing protein 5	Q80TC6
HOST_DN156817_c0_g1_i1	1.79861	4.56748e-07
HOST_DN77485_c1_g1_i2	1.79821	6.71653e-49	Tyrosine-protein phosphatase non-receptor type 9	P43378; Q53XR9
HOST_DN74219_c5_g2_i4	1.79796	2.72063e-43	Programmed cell death protein 10	Q8AVR4
HOST_DN74014_c0_g1_i1	1.79783	1.89979e-31	Oxygen-dependent coproporphyrinogen-III oxidase, mitochondrial	P36551; A8K275; B4DSD5; Q14060; Q53F08; Q8IZ45; Q96AF3
HOST_DN80183_c1_g3_i1	1.79714	0.000329509
HOST_DN78321_c3_g3_i1	1.79653	1.95593e-05
HOST_DN70631_c0_g1_i2	1.79525	3.82768e-24	Tissue factor pathway inhibitor	O54819; Q9Z2U8
HOST_DN71725_c1_g1_i1	1.79502	3.95491e-17	Nuclear factor interleukin-3-regulated protein	Q68EL6
HOST_DN79592_c1_g7_i1	1.79346	1.34611e-55	Guanine nucleotide-binding protein G(k) subunit alpha {ECO:0000303|PubMed:2452165}	P08754; P17539; Q5TZX1
HOST_DN13986_c0_g1_i1	1.79116	3.72572e-05	C-X-C chemokine receptor type 3	Q5MD61; A7E3R9
HOST_DN74681_c2_g1_i1	1.79105	2.465e-22
HOST_DN73193_c6_g2_i1	1.78871	0.00252569	Hemoglobin subunit alpha-D	P15164
HOST_DN79152_c2_g4_i3	1.78775	2.41743e-35	P2X purinoceptor 1	P51576; Q5SRU4
HOST_DN79973_c0_g1_i1	1.78704	1.49048e-07	ATP-dependent 6-phosphofructokinase, muscle type {ECO:0000255|HAMAP-Rule:MF_03184}	P47858; Q63736
HOST_DN34543_c0_g1_i1	1.78523	4.87982e-09	Transcription factor Sp8	Q6P0J3; Q6ED30
HOST_DN71562_c0_g1_i2	1.78443	4.6876e-05	Plasminogen activator inhibitor 1	P13909; Q3ZBB9
HOST_DN55667_c0_g1_i1	1.7839	0.000166765	Polyserase-2	Q5K2P9
HOST_DN71605_c0_g1_i1	1.7827	2.10508e-05
HOST_DN78405_c0_g1_i9	1.78039	1.86016e-09	M-protein, striated muscle	Q02173
HOST_DN54053_c0_g1_i1	1.77953	0.00035505
HOST_DN70216_c0_g1_i3	1.7785	1.62996e-05	Deoxyribonuclease-1	O18998
HOST_DN75299_c0_g1_i2	1.77795	1.02237e-39	Discoidin, CUB and LCCL domain-containing protein 1	Q8N8Z6; Q5H992; Q8IYK5; Q8N7L9; Q96NH2
HOST_DN93618_c0_g1_i1	1.77692	5.013e-08	Ectoine dioxygenase	Q2TDY4
HOST_DN76141_c6_g1_i1	1.77682	1.45035e-07	Kell blood group glycoprotein	P23276; B2RBV4; Q96RS8; Q99885
HOST_DN74929_c0_g1_i4	1.77457	2.84049e-05	Cilia- and flagella-associated protein 221 {ECO:0000312|HGNC:HGNC:33720}	Q4G0U5; B4DEK0; B4E2T5
HOST_DN73269_c0_g1_i1	1.77373	3.26616e-10	Prostacyclin synthase {ECO:0000303|PubMed:18032380}	F1RE08; A1XBQ5; A9LLA5
HOST_DN75444_c0_g4_i1	1.77317	4.37329e-09	Zinc finger protein RFP	P14373; A2BE15; Q5RJA8; Q5ST26; Q6LA73; Q6NXR9; Q9BZY6; Q9UJL3
HOST_DN77354_c0_g1_i3	1.77184	1.33902e-28
HOST_DN70778_c0_g1_i6	1.77112	1.50575e-11
HOST_DN77008_c4_g2_i4	1.77111	1.00686e-37	ATP-citrate synthase	Q91V92
HOST_DN76490_c1_g1_i2	1.77	1.1562e-22	Vascular endothelial growth factor C	P49767; B2R9Q8
HOST_DN80753_c2_g1_i3	1.76877	2.22258e-16	Rho-related BTB domain-containing protein 3	O94955; A0PJA4; A8K1W9; Q8IW06
HOST_DN76845_c0_g1_i2	1.76806	1.39608e-07	Duodenase-1	P80219; Q9GLN2
HOST_DN56422_c0_g2_i1	1.76712	0.00013185	Serine/threonine-protein kinase PAK 6	Q9NQU5; A8K2G2; B3KYB0; G5E9R2
HOST_DN74157_c6_g4_i9	1.76671	5.80573e-25	Inorganic pyrophosphatase	Q4R543
HOST_DN77986_c7_g1_i10	1.76654	6.59002e-20	Aminopeptidase Ey {ECO:0000303|PubMed:9734335}	O57579; A0A1D5NWZ2; D2KKL5
HOST_DN79203_c6_g1_i9	1.76629	0.000489827	Hemoglobin subunit alpha-A	Q9PVM4
HOST_DN71679_c0_g2_i2	1.76597	1.64992e-46	Ras-related protein Rab-25	Q58DW6; Q0VCM9
HOST_DN76760_c2_g6_i1	1.76526	4.25523e-26	Microtubule-associated protein RP/EB family member 3	Q5XIT1
HOST_DN142467_c0_g1_i1	1.764	0.000111538
HOST_DN76628_c2_g1_i1	1.76245	1.45905e-11	ADAMTS-like protein 5	Q6ZMM2; B4DXK7; Q8IW95
HOST_DN63514_c0_g1_i1	1.76214	5.40835e-09
HOST_DN73694_c8_g1_i5	1.76014	1.49788e-11	Y-box-binding protein 2-B	P45441; A9JS45
HOST_DN73310_c0_g1_i4	1.76012	1.34733e-21	60 kDa lysophospholipase	Q86U10; B9EGQ2; Q8IV80
HOST_DN81074_c1_g1_i1	1.75926	6.4375e-75	Glyceraldehyde-3-phosphate dehydrogenase 2	Q5MJ86
HOST_DN80765_c16_g1_i1	1.75745	1.51801e-36	Glyceraldehyde-3-phosphate dehydrogenase {ECO:0000250|UniProtKB:P00355}	Q5XJ10; Q1RM54
HOST_DN77631_c9_g2_i2	1.75708	5.04181e-27	Rho GTPase-activating protein 29	Q6PCS4
HOST_DN75781_c3_g2_i1	1.75542	2.20598e-15	Argininosuccinate synthase {ECO:0000305}	Q66I24
HOST_DN76520_c4_g3_i3	1.75418	3.19621e-23	Heat shock protein HSP 90-alpha	P07900; A8K500; B3KPJ9; Q2PP14; Q5CAQ6; Q5CAQ7; Q9BVQ5
HOST_DN80317_c4_g6_i1	1.75344	4.73052e-14
HOST_DN74195_c0_g2_i4	1.75229	2.48606e-05
HOST_DN76977_c8_g1_i1	1.7519	2.85992e-08	Proteasomal ubiquitin receptor ADRM1	Q6NZ09
HOST_DN13018_c0_g1_i1	1.74921	2.25489e-10
HOST_DN76055_c2_g1_i2	1.74833	7.63852e-09	Receptor activity-modifying protein 1	Q9WTJ5
HOST_DN71213_c0_g5_i1	1.74813	0.000206834	ERC protein 2	Q6PH08; Q80U20; Q8CCP1
HOST_DN75594_c0_g2_i2	1.74651	1.11109e-35	Mitochondrial genome maintenance exonuclease 1 {ECO:0000255|HAMAP-Rule:MF_03030}	Q9BQP7; B2RDG5; D3DW29; Q96SW3
HOST_DN80756_c2_g1_i2	1.74607	1.02991e-38	Fermitin family homolog 1	Q9BQL6; D3DW10; Q8IX34; Q8IYH2; Q9NWM2; Q9NXQ3
HOST_DN73355_c0_g1_i2	1.74549	3.72472e-23	Tumor necrosis factor ligand superfamily member 10	P50592
HOST_DN80335_c0_g2_i1	1.74517	0.000131003
HOST_DN79681_c6_g3_i1	1.74322	2.35057e-49	Guanine nucleotide-binding protein G(i) subunit alpha-1	Q5RAD4
HOST_DN100188_c0_g1_i1	1.74056	1.14782e-15	Sarcoplasmic/endoplasmic reticulum calcium ATPase 1	P13585
HOST_DN98582_c0_g1_i1	1.74036	7.69599e-07	PAN2-PAN3 deadenylation complex subunit PAN3 {ECO:0000255|HAMAP-Rule:MF_03181}	Q5T515; Q5T516; Q5TBA0; Q76E13; Q8NBA6
HOST_DN79654_c3_g3_i2	1.7383	1.20815e-09
HOST_DN79692_c1_g3_i2	1.73761	5.47286e-09	Zinc finger protein 480	Q8WV37; Q5JPG9; Q6P0Q4; Q8N1M5
HOST_DN79503_c0_g1_i12	1.73378	0.00063879
HOST_DN74808_c4_g1_i4	1.73339	6.97687e-14	Metastasis suppressor protein 1	O43312; J3KNK6; Q8TCA2; Q96RX2
HOST_DN65845_c0_g1_i1	1.73323	4.55217e-38	Bleomycin hydrolase	P87362
HOST_DN75223_c1_g1_i2	1.73149	7.86175e-51	E3 ubiquitin-protein ligase pellino homolog 2	Q9HAT8; B2RDY5
HOST_DN73761_c0_g1_i2	1.73092	3.05676e-27	Transgelin	Q9TS87; Q2KJH8
HOST_DN78914_c2_g2_i1	1.7282	5.63716e-08	Glutathione hydrolase 5 proenzyme	Q9Z2A9; Q8C7B4
HOST_DN76991_c4_g1_i2	1.72559	5.7453e-50	Beta-1,4-galactosyltransferase 5	Q9JMK0; A2A5T7
HOST_DN73188_c0_g1_i1	1.72402	7.11381e-07	Toll-like receptor 5	Q9JLF7
HOST_DN55235_c0_g1_i1	1.72248	2.33394e-07	Ryanodine receptor 1	P16960
HOST_DN78212_c6_g3_i2	1.7211	1.2945e-20	[Pyruvate dehydrogenase (acetyl-transferring)] kinase isozyme 3, mitochondrial	Q15120; B4DXG6
HOST_DN75106_c3_g1_i7	1.72104	3.72311e-44	Calcineurin B homologous protein 1	Q3SYS6
HOST_DN74529_c1_g1_i1	1.72097	0.000375493
HOST_DN76874_c5_g2_i1	1.72021	1.67235e-06	cAMP-specific 3',5'-cyclic phosphodiesterase 4A	Q8WUQ3; Q9H3H2
HOST_DN81215_c77_g3_i1	1.717	1.96266e-11	Putative uncharacterized protein ART2	Q8TGM7
HOST_DN78212_c6_g2_i3	1.71621	2.29123e-21	[Pyruvate dehydrogenase (acetyl-transferring)] kinase isozyme 3, mitochondrial	Q922H2; Q8BTX1
HOST_DN76816_c5_g1_i1	1.71536	1.6349e-07	Receptor-type tyrosine-protein phosphatase zeta	B9EKR1
HOST_DN76932_c6_g4_i1	1.71469	1.09405e-09	Tropomyosin alpha-1 chain	Q6DV90; Q7Z6L8; Q86W64; Q96IK2; Q9UCI1; Q9UCI2; Q9UCY9; Q9Y427
HOST_DN75565_c0_g3_i1	1.71414	0.00136427	Kell blood group glycoprotein	P23276; B2RBV4; Q96RS8; Q99885
HOST_DN75997_c5_g1_i3	1.70853	2.03856e-10	Hsp70-binding protein 1	Q99P31; Q9CYV8
HOST_DN60762_c0_g2_i1	1.70822	4.43857e-08
HOST_DN77231_c2_g3_i1	1.70733	0.000173618	Thrombospondin-1	P35448
HOST_DN70791_c0_g1_i4	1.70694	5.5757e-18
HOST_DN72680_c0_g2_i1	1.70669	1.14775e-20	Cyclin-dependent kinase inhibitor 1C	P49918
HOST_DN78309_c4_g1_i1	1.70379	1.07415e-24	Cysteine and histidine-rich domain-containing protein 1	Q7T3F7
HOST_DN66977_c0_g1_i1	1.70308	6.411e-07	Transcription termination factor 2, mitochondrial	Q49AM1; Q53HM2; Q9H4L6; Q9H7Y9
HOST_DN79773_c1_g1_i1	1.70279	0.00126925	Gastrotropin	P80020
HOST_DN71855_c0_g1_i1	1.7013	0.000347988	Phospholipase A2	P00594
HOST_DN74712_c3_g1_i3	1.69935	2.57102e-29	Lamina-associated polypeptide 2, isoforms beta/gamma	P42167; A2T926; Q14861
HOST_DN75071_c5_g1_i5	1.6959	3.50697e-38	Death-associated protein kinase 2	Q9UIK4; E9JGM7; O75892; Q24JS1
HOST_DN80187_c4_g2_i2	1.69545	2.99077e-30
HOST_DN75524_c0_g2_i1	1.69524	1.00501e-27	Tricarboxylate transport protein, mitochondrial	P79110
HOST_DN80837_c1_g1_i1	1.69464	5.2057e-20	Probable palmitoyltransferase ZDHHC21	A2VDT6
HOST_DN74831_c2_g1_i9	1.69303	5.046e-13	Calmodulin-regulated spectrin-associated protein 2 {ECO:0000305}	Q8C1B1; B7ZNI4; Q80TK8; Q8C4J5
HOST_DN68396_c0_g1_i2	1.69259	4.25644e-11	Transposable element Tc3 transposase	P34257
HOST_DN76929_c1_g1_i1	1.69249	2.64277e-16	Sorbitol dehydrogenase	Q58D31; Q0II66
HOST_DN76429_c2_g1_i2	1.69019	1.63324e-15	Tumor necrosis factor receptor superfamily member 22	Q9ER62; Q8VHB9; Q9CZA4
HOST_DN73151_c0_g2_i1	1.68988	0.0013203	Doublesex- and mab-3-related transcription factor A2	Q6YHU8
HOST_DN73427_c0_g1_i1	1.68915	9.02181e-08	Cysteine and histidine-rich domain-containing protein 1	A9YUB1
HOST_DN68612_c0_g1_i1	1.68909	0.000805019
HOST_DN74068_c0_g1_i6	1.68881	1.69884e-11	Protein CASC1	A6H8T2; Q5RHB4
HOST_DN74415_c1_g1_i3	1.68817	1.4911e-18	Cytochrome c	P00025
HOST_DN80149_c1_g2_i1	1.68808	1.69967e-12
HOST_DN31500_c0_g1_i1	1.68672	0.00011059	UDP-glucuronic acid/UDP-N-acetylgalactosamine transporter	Q9NTN3; A8K185; B7Z3X2; Q52LU5; Q92548
HOST_DN59151_c0_g1_i1	1.68573	0.00013894	Lysophosphatidic acid receptor 4	Q99677; B2RAC7; O15132; Q502U9; Q6NSP5
HOST_DN64163_c0_g2_i1	1.68491	0.000467351	Calpain-14	A8MX76; B3KRU9
HOST_DN71891_c0_g2_i1	1.6828	2.82902e-64	ATP-dependent RNA helicase DDX19A	Q9NUU7; B2RPL0; B4DRZ7; Q53FM0
HOST_DN76475_c3_g2_i2	1.68132	5.02593e-18	Zinc transporter ZIP9	Q3KR82
HOST_DN76341_c1_g1_i1	1.68038	4.40286e-20	Leucine-rich repeat protein 1	Q96L50; A5D6X3; B4DDE0; Q52M24; Q86SZ1; Q8N6H9
HOST_DN79746_c1_g1_i3	1.67945	3.16489e-08	DnaJ homolog subfamily C member 15	Q78YY6
HOST_DN147024_c0_g1_i1	1.67907	5.62967e-06
HOST_DN76518_c0_g2_i1	1.67832	8.61595e-32	Butyrophilin subfamily 1 member A1	Q13410; Q4VAN3; Q4VAN4; Q9H458
HOST_DN77795_c1_g1_i4	1.67787	3.5962e-57	Mothers against decapentaplegic homolog 5	Q9W7E7
HOST_DN79286_c4_g2_i1	1.67613	6.10747e-17	Uncharacterized oxidoreductase C663.09c	Q7Z9I2
HOST_DN73865_c2_g1_i3	1.67515	1.99261e-38	Amyloid-like protein 1	P51693; O00113; Q96A92
HOST_DN64509_c0_g1_i1	1.67505	2.26637e-06	Protein-methionine sulfoxide oxidase mical3b	F1QWK4; Q1LV75
HOST_DN75527_c2_g3_i3	1.67477	1.94387e-83	AP-1 complex-associated regulatory protein	Q63HQ0; B2RCV7; Q96GG6; Q9H0V0; Q9P1L4
HOST_DN77060_c7_g1_i3	1.67477	2.52131e-55	Guanine nucleotide-binding protein subunit beta-4	Q9HAV0; B3KMH5; D3DNR8
HOST_DN79390_c2_g3_i2	1.67476	2.00942e-06	Receptor-type tyrosine-protein phosphatase zeta	P23471; A4D0W5; C9JFM0; O76043; Q9UDR6
HOST_DN73040_c0_g1_i2	1.67334	2.51464e-08	Sialidase-4	Q8BZL1; Q6NS66
HOST_DN80432_c5_g1_i1	1.67299	8.43639e-29	Cholesterol 24-hydroxylase	Q9WVK8
HOST_DN71628_c0_g1_i4	1.6724	6.39129e-19	Importin subunit alpha-1 {ECO:0000305}	P52292; B9EJD6; Q53YE3; Q6NVW7; Q9BRU5
HOST_DN80579_c0_g1_i4	1.67149	1.32227e-14	Glycine N-acyltransferase-like protein 3	Q5SZD4
HOST_DN76005_c4_g1_i1	1.67121	1.98654e-13	Ceramide synthase 2	Q3ZBF8
HOST_DN80639_c4_g10_i3	1.67026	3.27534e-09
HOST_DN80532_c5_g1_i2	1.67019	2.80103e-34	Eukaryotic translation initiation factor 3 subunit J-A {ECO:0000255|HAMAP-Rule:MF_03009}	Q7SXU0
HOST_DN78054_c3_g1_i2	1.67011	2.15276e-21
HOST_DN75314_c1_g1_i2	1.6681	2.20247e-05	Zona pellucida sperm-binding protein 2	P48829
HOST_DN74326_c1_g2_i2	1.66735	6.18049e-12	Actin, alpha skeletal muscle 2	P10995; A9ULV6; Q6GNN1
HOST_DN68652_c0_g1_i1	1.66713	1.79506e-15	Dimethylaniline monooxygenase [N-oxide-forming] 5	P49109
HOST_DN72261_c1_g1_i3	1.66689	1.59398e-24	Beta-secretase 2	Q9JL18; Q3TNS7; Q8C5E9; Q8C793; Q9R1P7
HOST_DN81011_c3_g7_i1	1.66564	1.79915e-21
HOST_DN75841_c7_g1_i4	1.6655	6.70256e-38
HOST_DN57317_c0_g1_i1	1.66532	7.22264e-36	DELTA-sagatoxin-Srs1a {ECO:0000303|PubMed:22683676}	Q86FQ0
HOST_DN72366_c0_g1_i1	1.6652	2.71079e-15	Lysophosphatidic acid receptor 3	Q9EQ31
HOST_DN162449_c0_g1_i1	1.66517	0.00182035	P-selectin	P16109; Q5R344; Q8IVD1
HOST_DN74117_c2_g6_i1	1.66447	9.55887e-17	Mitochondrial import inner membrane translocase subunit TIM44	O35857; Q2NLC5
HOST_DN73291_c1_g1_i3	1.6644	3.73285e-20	Thioredoxin reductase 3	Q86VQ6; Q6PIS8; Q9NNW6; Q9P101
HOST_DN70809_c0_g1_i1	1.66388	1.79887e-05	C-C motif chemokine 20	Q8SQB1
HOST_DN81142_c5_g1_i1	1.66279	1.20894e-25	Autophagy-related protein 101	Q3B736
HOST_DN78432_c1_g3_i1	1.66269	1.26968e-09	Nicotinamide riboside kinase 2	Q9NPI5; B7ZKR3; Q52M81; Q9NZK3
HOST_DN59334_c0_g1_i1	1.6605	1.63856e-05	SH2 domain-containing protein 1A	Q3ZBB1
HOST_DN80953_c1_g1_i5	1.66017	2.05561e-07	Neutrophil cytosol factor 2	O77775
HOST_DN78751_c2_g2_i1	1.65977	5.48074e-26	Tyrosine-protein kinase PRAG1 {ECO:0000312|HGNC:HGNC:25438}	Q86YV5; Q8N3N5
HOST_DN79387_c2_g1_i1	1.65966	1.11334e-12	Serine/threonine-protein kinase LMTK1	Q6ZMQ8; O75136; Q6ZN31; Q86X28
HOST_DN62586_c0_g2_i2	1.65917	2.40492e-40	Annexin A3	P12429; B2R9W6; Q6LET2
HOST_DN78455_c6_g1_i4	1.65828	6.14604e-52	EH domain-containing protein 4 {ECO:0000305}	Q9EQP2
HOST_DN75868_c0_g1_i5	1.65768	1.04999e-39	ADP-ribose pyrophosphatase, mitochondrial	Q9BW91; Q8NBN1; Q8NCB9; Q8NG25
HOST_DN76485_c0_g1_i2	1.65694	4.06889e-32	Tissue factor	P20352
HOST_DN76557_c2_g3_i11	1.65668	6.63044e-09	Ras-related protein Rab-11A	Q5ZJN2
HOST_DN75458_c0_g1_i4	1.65542	3.80127e-10	Circularly permutated Ras protein 1	Q75J93; Q54ZR3
HOST_DN76386_c2_g1_i3	1.65284	3.03531e-74	Elongation factor 1-delta	Q4R3D4
HOST_DN70399_c0_g4_i1	1.65276	3.27314e-18
HOST_DN90216_c0_g1_i1	1.65246	0.000165033	Interferon-induced protein 44-like	Q53G44; Q86TE1; Q96B64; Q99984
HOST_DN76270_c0_g1_i2	1.65189	1.72012e-24	Cathepsin F	Q9R013; Q9WUT4
HOST_DN79677_c0_g1_i1	1.65106	2.27297e-21	Dedicator of cytokinesis protein 9 {ECO:0000305}	Q9BZ26; Q9BZ27; Q9BZ28; Q9UPU4
HOST_DN77881_c1_g1_i1	1.64969	4.25997e-16	Disintegrin and metalloproteinase domain-containing protein 12	O43184; O60470; Q5JRP0; Q5JRP1; Q6P9E3; Q6UWB0
HOST_DN80414_c6_g1_i1	1.64801	4.36439e-07	Sortilin	Q99523; B4DWI3; C0JYZ0; Q8IZ49
HOST_DN78918_c1_g8_i1	1.64677	2.37498e-19	Riboflavin kinase	Q969G6; Q5JSG9; Q9NUT7
HOST_DN80042_c8_g4_i1	1.64558	2.05874e-09	Collagen and calcium-binding EGF domain-containing protein 1	A8WGB1
HOST_DN79521_c6_g1_i1	1.64528	3.7585e-19	RNA/RNP complex-1-interacting phosphatase	O75319; B2RCT8; C9JYA6; Q6AI47; Q9BWE3
HOST_DN80177_c4_g1_i1	1.64514	6.24931e-06	Ras-related protein Rab-3C	P62824; Q62858; Q62974; Q63482; Q9CXQ1
HOST_DN77621_c2_g7_i1	1.64321	4.95195e-05
HOST_DN65773_c0_g2_i1	1.64053	2.90104e-23	Pyridoxal kinase	Q0II59
HOST_DN77586_c3_g1_i2	1.64045	8.70416e-07	Long-chain fatty acid transport protein 1 {ECO:0000305}	Q6PCB7; A6NIH2; B7Z662
HOST_DN73913_c0_g2_i1	1.64019	2.74427e-07	Caspase recruitment domain-containing protein 14	Q9BXL6; B8QQJ3; Q9BVB5
HOST_DN69431_c0_g1_i1	1.63958	2.21252e-23	Protein arginine N-methyltransferase 6	Q6NWG4; Q6PE31
HOST_DN10936_c0_g1_i1	1.63905	1.80099e-17	Macrophage-stimulating protein receptor	Q04912; A0A087WZG2; B5A944; B5A945; B5A946; B5A947
HOST_DN79850_c7_g2_i10	1.63867	1.59906e-28	Cytosolic phospholipase A2	P50392
HOST_DN66069_c0_g1_i1	1.63826	5.40335e-05
HOST_DN74734_c0_g1_i1	1.63566	3.82058e-06
HOST_DN128119_c0_g1_i1	1.63166	1.04658e-06
HOST_DN75409_c5_g1_i1	1.63163	1.47571e-45	T-complex protein 1 subunit beta	P80314; Q9R1U0
HOST_DN73553_c0_g1_i1	1.63146	3.20726e-48	Protein FAM162B	A3KP48
HOST_DN7185_c0_g1_i1	1.63097	8.63807e-19
HOST_DN73851_c0_g1_i3	1.62928	1.37692e-63	Pyruvate kinase PKM	Q91YI8; Q9CWB1
HOST_DN108835_c0_g1_i1	1.62928	6.12642e-08
HOST_DN66252_c0_g1_i2	1.62868	8.2969e-24	Mitotic spindle-associated MMXD complex subunit MIP18	Q9Y3D0
HOST_DN74876_c3_g1_i7	1.6283	1.78168e-15	E3 ubiquitin-protein ligase znrf2	Q08CN9
HOST_DN125759_c0_g1_i1	1.62787	1.08756e-06	E3 ubiquitin/ISG15 ligase TRIM25	Q14258
HOST_DN80546_c7_g1_i2	1.62696	7.31194e-19	Hormone-sensitive lipase	Q05469; Q3LRT2; Q6NSL7
HOST_DN76800_c7_g1_i5	1.62662	4.91333e-13	Caldesmon	Q05682; A8K0X1; Q13978; Q13979; Q14741; Q14742; Q9UD91
HOST_DN59421_c0_g1_i1	1.62586	1.04461e-12	Testosterone 17-beta-dehydrogenase 3	O54939
HOST_DN123080_c0_g1_i1	1.62317	2.07374e-05	Leiomodin-3 {ECO:0000303|PubMed:25250574}	E7F7X0
HOST_DN79901_c0_g2_i3	1.62208	9.75693e-23	Acetyl-coenzyme A synthetase 2-like, mitochondrial	Q8N234; Q96JI1; Q96JX6; Q9NU28
HOST_DN73023_c0_g1_i2	1.62136	5.16168e-18	Glucocorticoid receptor	O73673
HOST_DN78647_c4_g1_i1	1.62133	1.85436e-21	Tyrosine-protein kinase ABL2	Q6NZY6; Q7Z301
HOST_DN101760_c0_g1_i1	1.62029	0.00174847
HOST_DN77195_c5_g1_i3	1.62007	0.00121877	Coagulation factor XI	Q91Y47; Q9DAT3
HOST_DN79635_c3_g1_i2	1.6191	1.38199e-32	Receptor-interacting serine/threonine-protein kinase 2	P58801
HOST_DN80616_c1_g1_i2	1.61896	3.3108e-06	Adaptin ear-binding coat-associated protein 1	Q3T093; A5PKA6
HOST_DN75287_c1_g1_i2	1.6186	5.57395e-06
HOST_DN74693_c2_g2_i1	1.61859	6.23702e-07
HOST_DN81117_c4_g4_i1	1.6171	0.000148967
HOST_DN81089_c3_g3_i1	1.61696	0.000231493	Leucine-rich alpha-2-glycoprotein	P02750; Q8N4F5; Q96QZ4
HOST_DN71541_c0_g1_i1	1.61644	6.20216e-09	Docosahexaenoic acid omega-hydroxylase CYP4F3 {ECO:0000305}	Q08477; B7Z8Z3; O60634; Q5U740
HOST_DN79179_c0_g1_i4	1.61558	3.3943e-27	CMP-N-acetylneuraminate-beta-galactosamide-alpha-2,3-sialyltransferase 4	Q11206; A8K6B2; O60497; Q8N6A6; Q8NFG7; Q96QQ9
HOST_DN75518_c1_g1_i2	1.61426	1.76126e-20	Pleckstrin homology domain-containing family G member 5	Q66T02; A2A8B6; A2A8B7; Q66T00; Q6P3B1; Q6ZQ62; Q8R571
HOST_DN76658_c4_g3_i3	1.61326	9.83188e-31	Cell division control protein 42 homolog	Q8CFN2; Q6P9Y3; Q71TW5
HOST_DN79722_c0_g1_i2	1.61299	1.20945e-24	Polyserase-2	Q5K4E3; A8K2P5; B4DW80; B7ZMK8; E7EX56; Q8NBY4
HOST_DN77636_c1_g6_i1	1.61232	5.22235e-05	Lovastatin nonaketide synthase	Q0C8M3
HOST_DN141869_c0_g1_i1	1.6122	4.65337e-06
HOST_DN75004_c0_g1_i3	1.61122	2.50439e-07	IGF-like family receptor 1	Q3U4N7; Q8VE58
HOST_DN79954_c3_g1_i2	1.61016	9.72754e-25	Nuclear pore membrane glycoprotein 210	Q8TEM1; A6NN56; O94980; Q6NXG6; Q8NBJ1; Q9H6C8; Q9UFP3
HOST_DN69489_c0_g1_i3	1.60983	1.28578e-06	Prosaposin	O13035
HOST_DN73705_c0_g1_i3	1.60975	1.01336e-22	Transmembrane gamma-carboxyglutamic acid protein 1	Q5RCB6
HOST_DN75357_c1_g1_i1	1.60869	1.30937e-07	Inward rectifier potassium channel 2	P49656
HOST_DN76990_c1_g1_i2	1.60843	0.00634623
HOST_DN75835_c0_g2_i2	1.60633	4.2641e-07	MAGUK p55 subfamily member 3	Q13368; B2R7N0; D3DX47; Q4GX05; Q6PGR3; Q86SV1
HOST_DN91144_c0_g1_i1	1.60519	3.99134e-14	RAS guanyl-releasing protein 2	Q9QUG9; O09004; Q80WC0; Q8BSC8
HOST_DN71111_c0_g2_i1	1.60377	3.51975e-17	Putative peptidyl-tRNA hydrolase PTRHD1	Q3SZ85
HOST_DN77767_c6_g1_i1	1.60302	7.72637e-13	Transcriptional activator protein Pur-beta	Q6PHK6; Q6NW99
HOST_DN65425_c0_g1_i1	1.60065	5.84678e-09	DENN domain-containing protein 4C	Q9H6N4; Q9NUT1; Q9NWA5; Q9NWT3; R4GN35; R4GNB2
HOST_DN79695_c0_g2_i4	1.60046	2.6351e-68	Flotillin-1	O13127
HOST_DN71420_c0_g1_i1	1.5994	2.04791e-21	Phosphoglycerate mutase 1	Q5ZLN1; P84174
HOST_DN84382_c0_g1_i1	1.59876	0.000291871
HOST_DN80042_c8_g3_i4	1.59822	1.11992e-17	Collagen and calcium-binding EGF domain-containing protein 1	A8WGB1
HOST_DN80809_c6_g1_i1	1.59816	1.95562e-19	ADP-ribosylation factor-like protein 6-interacting protein 4	Q502P0
HOST_DN76545_c1_g1_i6	1.59587	5.16258e-35	Ras suppressor protein 1	Q5E9C0
HOST_DN126279_c0_g1_i1	1.59405	0.000690035	Protein-methionine sulfoxide oxidase mical3b	F1QWK4; Q1LV75
HOST_DN110109_c0_g1_i1	1.59323	0.000757617
HOST_DN77278_c8_g1_i1	1.59241	2.42277e-10	SH2 domain-containing protein 4A	Q08CX2
HOST_DN78728_c6_g1_i5	1.59084	9.97329e-25	Solute carrier family 45 member 4	Q5BKX6; Q6ZRI2; Q9ULU3
HOST_DN92371_c0_g1_i1	1.59005	1.71221e-07	BRICHOS domain-containing protein 5	Q6PL45; C9J7K2; Q8IXU9
HOST_DN78802_c7_g1_i5	1.58921	0.00296693	LHFPL tetraspan subfamily member 3 protein {ECO:0000250|UniProtKB:Q86UP9}	Q6DHB5
HOST_DN74625_c2_g2_i2	1.58841	2.02676e-34	Sarcoplasmic/endoplasmic reticulum calcium ATPase 2	Q03669
HOST_DN80820_c4_g2_i3	1.58774	3.78448e-12	Nuclear receptor subfamily 5 group A member 2	O00482; B4E2P3; O95642; Q147U3
HOST_DN78484_c4_g7_i1	1.5836	1.81198e-05
HOST_DN78130_c1_g6_i1	1.58258	0.000188331	ATP-sensitive inward rectifier potassium channel 11	Q61743; Q9QX21
HOST_DN76319_c4_g1_i1	1.58249	5.403e-17	Protein SOGA1	O94964; A6NK10; Q14DB2; Q5JW51; Q6ZTG8
HOST_DN71102_c0_g1_i1	1.58242	0.000177801
HOST_DN77646_c5_g3_i1	1.58168	9.76114e-19	Sphingomyelin synthase-related protein 1	Q9DA37
HOST_DN79943_c7_g1_i1	1.58134	4.23724e-09	E3 ubiquitin-protein ligase TRIM21	P19474; Q5XPV5; Q96RF8
HOST_DN77391_c6_g7_i5	1.58027	0.000457905	Interferon regulatory factor 2	P14316; D6RCK5; H0Y8S3; Q6IAS7; Q96B99
HOST_DN74948_c3_g5_i1	1.57964	7.50433e-26	Ras GTPase-activating protein-binding protein 1	Q13283; Q5HYE9
HOST_DN152019_c0_g1_i1	1.57936	2.34145e-10
HOST_DN78474_c2_g1_i3	1.57897	7.09114e-20	Riboflavin transporter 2	B5X4H8
HOST_DN80901_c29_g3_i2	1.57804	4.53694e-07	Actin, alpha sarcomeric/skeletal {ECO:0000250|UniProtKB:P04752}	Q6P8G3
HOST_DN81331_c3_g2_i2	1.57731	4.1683e-23	Tubulin alpha chain	P02553
HOST_DN78201_c1_g1_i3	1.57678	5.05287e-18	Oxysterol-binding protein-related protein 3	Q8NFH1; Q8NI12; Q8NI13; Q9BZF4; Q9UED6
HOST_DN69288_c0_g1_i2	1.57634	2.61193e-15	UDP-glucose 6-dehydrogenase	Q5F3T9
HOST_DN81377_c5_g6_i2	1.57631	1.71103e-16	Emopamil-binding protein-like	Q9D0P0; Q3TQR1; Q9CRQ2; Q9CY81
HOST_DN81490_c4_g1_i2	1.57387	0.000173669	Solute carrier family 22 member 13	Q6A4L0; E9QP74; Q8VC89
HOST_DN78101_c4_g4_i1	1.5731	0.00118715	Sex comb on midleg-like protein 4	Q8N228; B0QZ10; B0QZ11; B7ZBX3; Q5JXD0; Q5T0T6; Q8IYY6
HOST_DN68514_c0_g1_i2	1.57262	1.17527e-11
HOST_DN78859_c2_g2_i2	1.57166	4.29595e-09	LIM domain-binding protein 2	O43679; O60619; O75480
HOST_DN74948_c3_g4_i1	1.57136	2.65189e-36
HOST_DN78621_c2_g3_i3	1.57074	1.31181e-26	Sphingolipid delta(4)-desaturase DES1	Q5F3C1
HOST_DN77902_c4_g1_i1	1.57043	0.000935584	Relaxin-3 receptor 1	Q8BGE9
HOST_DN75578_c3_g2_i3	1.56924	2.144e-34	Pleckstrin homology domain-containing family A member 5	Q96DY9; Q9BVR4; Q9C0H7; Q9H924; Q9NVK8
HOST_DN74442_c2_g2_i1	1.56884	8.90695e-19	1-acyl-sn-glycerol-3-phosphate acyltransferase delta	Q5E9R2; Q5EA78
HOST_DN74941_c0_g1_i3	1.56824	1.00631e-19	Leukotriene A-4 hydrolase	P24527; Q3UY71; Q8VDR8
HOST_DN76965_c9_g1_i3	1.56781	4.04316e-07	Peptidyl-prolyl cis-trans isomerase FKBP5	Q13451; F5H7R1; Q59EB8; Q5TGM6
HOST_DN75179_c1_g4_i2	1.56648	5.4262e-09	Ras-related protein Rab-3A	P11023; Q17QM2
HOST_DN77725_c1_g3_i4	1.56532	1.46286e-36	Tetraspanin-3	Q5RE11
HOST_DN55152_c0_g1_i1	1.56469	6.28763e-10	PR domain zinc finger protein 1	Q60636; A2VDE8; Q3UET9
HOST_DN79972_c5_g2_i3	1.56465	4.87734e-23	RELT-like protein 1	Q8IUW5; Q8NBK1
HOST_DN76043_c8_g1_i7	1.5637	1.52591e-07	WD repeat-containing protein 73	Q567G2
HOST_DN76079_c1_g5_i1	1.56303	5.10242e-23	Nuclear factor NF-kappa-B p100 subunit	Q9WTK5
HOST_DN79588_c4_g2_i1	1.5623	1.66545e-11	NLR family CARD domain-containing protein 3	Q7RTR2; Q5EY36; Q8NF48; Q8NI01; Q8NI02; Q8TEL3
HOST_DN77328_c1_g2_i11	1.56208	4.58368e-20	Structural maintenance of chromosomes flexible hinge domain-containing protein 1	A6NHR9; O75141; Q6AHX6; Q6ZTQ8; Q9H6Q2; Q9UG39
HOST_DN78345_c2_g2_i3	1.55818	2.76751e-40	Ras GTPase-activating protein 3	Q14644; A6NL15; F8W6X8; Q8IUY2
HOST_DN66232_c0_g1_i1	1.55729	7.19553e-26	Prohibitin	P84173
HOST_DN77950_c2_g5_i1	1.55727	1.12216e-18
HOST_DN155505_c0_g1_i1	1.55582	3.37609e-23	Lysophosphatidic acid receptor 6	Q4G072
HOST_DN81036_c5_g1_i2	1.55483	4.12428e-26	Chloride intracellular channel protein 1	O00299; Q15089; Q502X1
HOST_DN79413_c1_g3_i1	1.55464	4.87933e-06
HOST_DN78404_c7_g2_i2	1.55363	0.000864809	F-box/LRR-repeat protein 3	Q9UKT7; B2RB04; Q9P122
HOST_DN72846_c0_g1_i1	1.55241	1.63734e-20	Ethanolaminephosphotransferase 1 {ECO:0000305}	Q80TA1; Q3KQQ5; Q8BG08
HOST_DN79622_c1_g1_i2	1.55105	0.0083181
HOST_DN75713_c6_g1_i8	1.55047	0.000103386	Retinol dehydrogenase 7	P55006; P50169; Q4KMB6
HOST_DN81462_c3_g1_i3	1.54908	3.91186e-10	Nuclear GTPase SLIP-GC	Q68CJ6; Q6ZP73
HOST_DN80032_c2_g1_i1	1.54892	1.1156e-35	Complement control protein	Q2HRD4; D0UZL0
HOST_DN145982_c0_g1_i1	1.54863	9.11902e-19	G protein-coupled receptor kinase 6	O70293; O70294; O70295; Q6DI67
HOST_DN79413_c2_g1_i1	1.54845	1.30178e-07	Eosinophil peroxidase	P49290; Q5SW51; Q61798
HOST_DN74442_c2_g4_i1	1.54817	0.000185496
HOST_DN65899_c0_g1_i2	1.54785	3.14119e-24	Coactosin-like protein	Q2HJ57
HOST_DN55146_c0_g1_i1	1.54754	7.3824e-06
HOST_DN80072_c5_g4_i2	1.54749	3.10064e-22	Mitochondrial import inner membrane translocase subunit Tim8 A	Q66L32
HOST_DN78428_c1_g1_i1	1.54674	1.09496e-05	Transmembrane protease serine 7	P86091
HOST_DN78150_c2_g3_i1	1.54626	1.60564e-05	Melanocyte-stimulating hormone receptor	P55167
HOST_DN75332_c7_g1_i2	1.545	0.00189351
HOST_DN71848_c0_g1_i1	1.54412	2.15522e-24	Protein FAM136A	Q6PBU0
HOST_DN75443_c0_g1_i2	1.54338	5.88754e-18	Acetyl-CoA acetyltransferase, cytosolic	Q9BWD1; B7Z233; E1P5B1; Q16146; Q5TCL7; Q8TDM4
HOST_DN73887_c0_g1_i1	1.54192	3.63009e-20	Complement component 1 Q subcomponent-binding protein, mitochondrial	O35796; Q6IRS5
HOST_DN74476_c2_g1_i2	1.54094	1.06108e-25	Multidrug resistance-associated protein 5	Q9UNP5; Q9UQC3
HOST_DN79434_c2_g1_i3	1.53993	9.48273e-26	Alpha-aminoadipic semialdehyde synthase, mitochondrial	A8E657
HOST_DN72146_c0_g1_i2	1.53808	1.76923e-16	TRAF-interacting protein with FHA domain-containing protein A	A2VDM0
HOST_DN75167_c0_g1_i2	1.53555	2.10551e-67	Disintegrin and metalloproteinase domain-containing protein 10	O77633; B3VKE8; K7GKL8
HOST_DN80104_c1_g5_i2	1.53444	0.000885248
HOST_DN79085_c0_g1_i2	1.53376	4.72165e-15	Probable RNA-directed DNA polymerase from transposon X-element	Q9NBX4
HOST_DN73463_c0_g3_i1	1.53371	1.21289e-13
HOST_DN80774_c4_g2_i2	1.53186	1.80047e-51	VIP36-like protein	P59481; Q3TZ91
HOST_DN76278_c1_g1_i3	1.53122	5.16914e-08	Breast cancer metastasis-suppressor 1-like protein-A	Q4V8V1
HOST_DN59617_c0_g1_i1	1.53095	1.07034e-17	Numb-like protein	O08919; Q4QQQ2; Q6NVG8
HOST_DN79247_c5_g2_i1	1.52941	1.64935e-15	G protein-coupled receptor kinase 6	P43250; O60541; Q13652
HOST_DN73763_c3_g1_i1	1.52896	2.51362e-31	2-(3-amino-3-carboxypropyl)histidine synthase subunit 1 {ECO:0000305}	Q6GPQ5
HOST_DN75029_c4_g1_i7	1.52864	0.000172012	[Protein ADP-ribosylarginine] hydrolase	P54922; B2R8H1; D3DN83
HOST_DN76259_c4_g1_i1	1.52827	1.00248e-11	Disintegrin and metalloproteinase domain-containing protein 33	Q923W9; Q8R5G5
HOST_DN78511_c3_g5_i2	1.52585	2.54375e-07	RNA-binding protein FUS	P56959
HOST_DN75096_c1_g2_i2	1.52454	9.62148e-20	Actin, cytoplasmic 2	P53485
HOST_DN34584_c0_g1_i1	1.52429	0.000213449	Dickkopf-related protein 1	O54908; Q80UL5
HOST_DN49441_c0_g1_i1	1.5237	9.48932e-05	Fibrocystin-L	Q80ZA4; Q99PS9
HOST_DN70361_c0_g1_i1	1.52347	4.83225e-21	Stromal cell-derived factor 2	Q9DCT5; P97307
HOST_DN77426_c0_g1_i12	1.52197	1.12759e-06
HOST_DN76868_c3_g2_i3	1.52106	5.57958e-29	AN1-type zinc finger protein 3	Q497H0; Q8K230; Q8R2V7; Q8R3V1
HOST_DN78351_c3_g4_i3	1.52055	2.64149e-22	Choline kinase alpha	Q01134; Q63114
HOST_DN72157_c1_g3_i1	1.52014	0.000404535	WD repeat-containing protein 49	Q8IV35; Q8N297
HOST_DN78527_c3_g1_i9	1.51979	2.96247e-12	Peptidyl-prolyl cis-trans isomerase FKBP10	Q2HJ89
HOST_DN78743_c2_g1_i3	1.51879	1.7033e-34
HOST_DN22190_c0_g1_i1	1.51805	6.25151e-08
HOST_DN72504_c0_g1_i1	1.51778	0.000677095	Hyaluronan synthase 1	P13563; Q5D0A1
HOST_DN79369_c5_g1_i5	1.51728	0.001174	WD repeat-containing protein 63	Q8IWG1; A8K988; Q96L72; Q96NU4
HOST_DN72826_c0_g2_i2	1.5164	0.00079703	Mitogen-activated protein kinase 15 {ECO:0000250|UniProtKB:Q501Q9}	Q501Q9
HOST_DN76760_c2_g1_i2	1.51541	2.32807e-62	PRELI domain containing protein 3B	Q6P9U4
HOST_DN71689_c0_g1_i1	1.51475	3.8574e-25	AP-1 complex subunit mu-2	Q3SYW1
HOST_DN68126_c0_g4_i1	1.51407	0.000296044
HOST_DN123089_c0_g1_i1	1.51217	0.000732183	Deoxyribonuclease gamma	Q13609; B2R8B1; B7Z707; O75803
HOST_DN71166_c0_g1_i1	1.51162	5.05434e-05	Carbohydrate sulfotransferase 11	Q9NPF2; A8K4F8; Q9NXY6; Q9NY36
HOST_DN76068_c5_g2_i3	1.5114	2.66719e-21	Hypoxanthine-guanine phosphoribosyltransferase	Q9W719
HOST_DN69576_c0_g1_i2	1.51036	0.000169874	SH3 domain-containing kinase-binding protein 1	Q96B97; B7Z1D5; Q5JPT4; Q5JPT5; Q8IWX6; Q8IX98; Q96RN4; Q9NYR0
HOST_DN78502_c1_g2_i7	1.50936	0.000186837	Transcription factor CP2-like protein 1	Q9NZI6; Q4ZG43
HOST_DN78399_c3_g2_i1	1.5087	0.000212264	AT-rich interactive domain-containing protein 3A	Q6GQD7
HOST_DN75695_c5_g1_i6	1.5086	2.92593e-29	F-box only protein 10	Q7TQF2; A2ANI6; Q6AXG0; Q7TQM0
HOST_DN77599_c1_g1_i4	1.50836	0.00100705
HOST_DN78109_c6_g3_i9	1.50806	5.91461e-08	Muellerian-inhibiting factor	P79295
HOST_DN75551_c2_g2_i1	1.50748	2.35736e-30	Cytochrome b5	P00167; A8MV91; F8WEU4; Q6IB14
HOST_DN79294_c4_g1_i1	1.50636	2.52305e-14	Mitochondrial inner membrane protease subunit 2	Q6AZD4
HOST_DN73870_c0_g1_i1	1.506	0.00534891	IQ domain-containing protein K	Q8N0W5; B2RDU0; O43327; Q8NFF4
HOST_DN80810_c0_g1_i2	1.50556	8.65576e-27	ATP-binding cassette sub-family B member 9	Q9JJ59; Q8CHA1; Q9D212; Q9JIN1
HOST_DN9738_c0_g1_i1	1.50435	2.18748e-06	Beta-1,3-galactosyltransferase 2	Q5R5Y3
HOST_DN78104_c0_g2_i2	1.50318	9.84158e-16	Serine/threonine-protein phosphatase 2A regulatory subunit B'' subunit alpha	Q06190; A8KAE7; B4DNU1; B7ZAE3; Q06189; Q9NPQ5
HOST_DN75081_c2_g3_i3	1.50317	3.26989e-35	MAP kinase-interacting serine/threonine-protein kinase 1	Q66JF3
HOST_DN76639_c5_g1_i4	1.5029	1.66999e-28	Zinc finger protein 24 {ECO:0000312|MGI:MGI:1929704}	Q91VN1; Q5MDG8; Q9WUQ0
HOST_DN79267_c2_g1_i1	1.50247	2.85129e-35	Guanine nucleotide-binding protein G(q) subunit alpha	Q2PKF4
HOST_DN78113_c2_g8_i1	1.50242	2.65865e-23	Cryptochrome DASH	Q4KML2; Q75WS5
HOST_DN71915_c0_g1_i1	1.5008	4.20189e-14	Ras association domain-containing protein 9	O75901; B3KMQ4; Q8N5U8
HOST_DN77084_c2_g1_i1	1.50065	6.72787e-26	Integrin alpha-3	F1MMS9
HOST_DN75564_c1_g1_i3	1.50034	2.81926e-09	WD repeat-containing protein 20	Q8NCN7; Q8WXX2; Q9UF86
HOST_DN75460_c4_g9_i1	1.50021	1.55136e-09
HOST_DN75144_c0_g1_i2	1.49894	1.18092e-08	10 kDa heat shock protein, mitochondrial	Q9W6X3
HOST_DN80164_c3_g1_i2	1.4969	6.88598e-13
HOST_DN79017_c2_g2_i1	1.49608	0.00682453	Homeobox protein Nkx-6.1	Q60554
HOST_DN74037_c0_g2_i4	1.49564	9.34915e-12	CD9 antigen	P40241
HOST_DN76208_c1_g1_i1	1.49523	0.000183311	Transmembrane 4 L6 family member 1	P30408; Q6IB51
HOST_DN80538_c12_g1_i1	1.49347	0.000703783
HOST_DN75988_c10_g1_i2	1.4933	1.49039e-19	Methionine-R-sulfoxide reductase B1-A	Q802G6; Q6NWX6
HOST_DN78334_c9_g1_i1	1.49179	2.26002e-07	Syntaphilin	O15079; Q8IYI3
HOST_DN80556_c4_g2_i4	1.4917	6.60611e-47	Carboxypeptidase D	O75976; B7Z7T9; B7ZAU4; F5GZH6; O15377; Q86SH9; Q86XE6
HOST_DN78591_c2_g1_i2	1.49115	1.32869e-27	Rho-related GTP-binding protein RhoG	P84096; P35238; Q8NI04
HOST_DN79888_c1_g1_i1	1.49097	1.5576e-13	DnaJ homolog subfamily A member 3, mitochondrial	Q99M87; Q8BSM0; Q99L09; Q99P71; Q99P76; Q9CT11; Q9DBJ7; Q9DC44
HOST_DN79524_c6_g1_i1	1.49094	5.02882e-07	Guanine nucleotide-binding protein subunit alpha-14	P38408
HOST_DN65086_c0_g1_i1	1.4907	2.92851e-05	Signal-transducing adaptor protein 2	Q9UGK3; A6NKK3; Q9NXI2
HOST_DN77733_c0_g1_i4	1.48906	8.54843e-44	Supervillin	Q8K4L3; E9Q983
HOST_DN77281_c4_g1_i3	1.48864	2.75977e-29	ADP-ribosylation factor 1	P84079; P10947; P32889
HOST_DN72247_c0_g1_i2	1.48841	2.50116e-33	Receptor expression-enhancing protein 5	Q5RE33
HOST_DN81075_c2_g1_i1	1.48817	4.11652e-35	Supervillin	Q8K4L3; E9Q983
HOST_DN77450_c2_g2_i1	1.48783	4.30144e-22
HOST_DN69943_c0_g3_i1	1.48667	1.0759e-05
HOST_DN77406_c6_g2_i1	1.48652	1.57318e-31	SPRY domain-containing protein 3	Q5RBR6
HOST_DN75598_c3_g1_i13	1.48612	2.17277e-10	Rho guanine nucleotide exchange factor 25	Q86VW2; A6NJH5; A9CQZ6; F8W7Z4; Q8WV84; Q96E63
HOST_DN75342_c3_g1_i1	1.48579	6.6669e-54	Transmembrane protein 189	A5PLL7
HOST_DN69736_c0_g1_i2	1.48397	6.04702e-08	Amphiregulin {ECO:0000303|PubMed:2325643}	P15514; Q5U026
HOST_DN75438_c4_g3_i2	1.48293	5.38548e-38	MOB kinase activator 3A	Q8BSU7; Q3TBK2
HOST_DN48361_c0_g1_i1	1.48273	0.000353368
HOST_DN77836_c1_g1_i1	1.4823	0.000115678	Insulin-like growth factor-binding protein 1	P24591; Q2T9Z3
HOST_DN111625_c0_g1_i1	1.48207	3.09935e-20	39S ribosomal protein L35, mitochondrial	Q5R9N0; Q5R9X2
HOST_DN75241_c4_g2_i1	1.47991	7.19667e-11	Granulocyte-macrophage colony-stimulating factor receptor subunit alpha	Q14430; Q14431; Q16564
HOST_DN79458_c6_g4_i1	1.47959	1.15208e-05	Hepatitis A virus cellular receptor 1 homolog	Q5QNS5; Q7TPU2; Q8VIM1; Q8VIM2
HOST_DN66648_c0_g1_i1	1.47945	0.00014142	Protein dispatched homolog 3 {ECO:0000250|UniProtKB:Q9P2K9}	A3KFU9; Q0EEE3; Q69ZL6; Q6GQX3; Q6NS63
HOST_DN81029_c4_g6_i1	1.47938	8.04519e-07	Regulator of G-protein signaling 2	Q0P5H5
HOST_DN74407_c6_g5_i1	1.47874	1.13975e-14	Leukocyte elastase inhibitor	P80229
HOST_DN67516_c0_g1_i2	1.47684	3.1787e-05
HOST_DN80274_c8_g2_i1	1.47477	1.71745e-18	Proteinase-activated receptor 2	P55086
HOST_DN81060_c1_g1_i4	1.47466	1.74877e-24	Glucose-6-phosphate isomerase	P06744; B4DG39; Q9BRD3; Q9BSK5; Q9UHE6
HOST_DN74182_c5_g2_i6	1.47351	8.59649e-21	26S proteasome non-ATPase regulatory subunit 12	Q2KJ25
HOST_DN73561_c1_g1_i3	1.47277	7.76844e-11	Tripartite motif-containing protein 16	Q99PP9; Q7TPY6; Q8C332; Q8C6V0
HOST_DN78200_c3_g1_i3	1.47273	2.40529e-15	Sodium- and chloride-dependent GABA transporter 2	P31649
HOST_DN91047_c0_g1_i1	1.47146	2.39235e-05	Interleukin-20	Q9JKV9
HOST_DN80852_c2_g1_i1	1.46977	3.78511e-23
HOST_DN69133_c0_g1_i1	1.46954	6.18818e-17	Beta-1,3-galactosyltransferase 2	Q5R5Y3
HOST_DN79524_c6_g2_i1	1.4689	1.37926e-32	Guanine nucleotide-binding protein G(q) subunit alpha	P21279; Q6PFF5
HOST_DN31950_c0_g1_i1	1.46788	1.32996e-08	Serine protease 27	Q6BEA2
HOST_DN80641_c1_g1_i11	1.46725	2.20855e-06	Tubulin alpha chain	Q8WQ47
HOST_DN76636_c1_g1_i5	1.46709	6.14322e-47	Flotillin-2a	Q98TZ8; B5DDN8; Q803F9
HOST_DN80807_c3_g2_i1	1.46704	5.1344e-22	Amyloid-beta A4 protein	O73683
HOST_DN71711_c0_g1_i3	1.46699	1.11381e-09	Protein phosphatase 1H	Q3UYC0; Q3UD05; Q3V3H5; Q3V3Y7; Q571C9; Q7TMU7; Q8BYE6
HOST_DN77912_c1_g1_i2	1.46684	1.72469e-20	Glucose-6-phosphate 1-dehydrogenase	P54996
HOST_DN78937_c2_g1_i2	1.46614	8.15374e-07	Adenylate kinase isoenzyme 1 {ECO:0000255|HAMAP-Rule:MF_03171}	P12115
HOST_DN72157_c1_g2_i1	1.46577	0.000565757	WD repeat-containing protein 49	Q8IV35; Q8N297
HOST_DN77336_c4_g5_i1	1.46475	1.77682e-23	Nuclear factor NF-kappa-B p100 subunit	O73630
HOST_DN77053_c8_g1_i1	1.46319	6.71498e-37	Ras-related protein Rab-1A	Q6NYB7; P05711
HOST_DN71831_c0_g1_i1	1.46308	3.21299e-13	Apoptosis facilitator Bcl-2-like protein 14	Q9BZR8; A8KAD0; Q96QR5; Q9BZR7
HOST_DN75028_c1_g1_i1	1.46115	1.97861e-08	Tribbles homolog 2	Q92519; B2R851; D6W510
HOST_DN74636_c1_g3_i3	1.46091	5.14336e-10	von Willebrand factor A domain-containing protein 7	Q9JHA8; Q9Z1Q8
HOST_DN74015_c1_g2_i4	1.4596	3.96167e-27	Transmembrane protein 120A	A3KNK1
HOST_DN64048_c0_g1_i1	1.45958	7.00587e-13	Fibrinogen-like protein 1	Q3SZZ7
HOST_DN77566_c1_g1_i4	1.45877	1.39856e-18	Sodium-dependent lysophosphatidylcholine symporter 1-B	Q6DEJ6; Q1LYS0
HOST_DN115827_c0_g1_i1	1.45746	1.76144e-06
HOST_DN38098_c0_g1_i1	1.45691	0.00461002
HOST_DN78171_c4_g2_i4	1.45688	3.78489e-05	Protein unc-93 homolog A	Q5SPF7
HOST_DN70867_c1_g1_i2	1.45623	1.66586e-05	Transposable element Tcb1 transposase	P35072
HOST_DN77539_c4_g2_i2	1.45543	0.00443156	Transmembrane protein 26	Q6ZUK4; Q6ZVM0; Q8IVN9
HOST_DN74228_c0_g2_i3	1.45439	9.62607e-12	Protein FAM214B	Q5BIM2
HOST_DN78567_c3_g1_i1	1.45435	6.63789e-40	Protein phosphatase 1 regulatory subunit 14B	Q8K3F3
HOST_DN80997_c4_g4_i1	1.45362	3.96634e-48	Tumor necrosis factor, alpha-induced protein 8-like protein 2 B	Q7T364
HOST_DN78561_c1_g1_i1	1.45263	6.31603e-37	Tumor protein 63	O88898; O88897; O88899; O89097; Q8C826; Q9QWY9; Q9QWZ0
HOST_DN79869_c4_g3_i7	1.45168	7.04789e-18	Thioredoxin-like protein 1	Q8CDN6; O70379; Q3TI92
HOST_DN74749_c5_g1_i6	1.45143	1.91364e-10	Lymphoid-restricted membrane protein	Q5RHB5; J9WMP5
HOST_DN71235_c0_g1_i1	1.45107	0.000393167	C5a anaphylatoxin chemotactic receptor 1	P0C7U5
HOST_DN79685_c2_g12_i2	1.45072	4.7684e-09	Nucleoplasmin-like protein NO29	O42584
HOST_DN78911_c0_g1_i3	1.4473	4.08517e-23	Probable thiopurine S-methyltransferase	Q504A5
HOST_DN81431_c6_g1_i1	1.44685	1.04031e-14	CD81 protein	Q9N0J9
HOST_DN77673_c3_g3_i3	1.44659	9.72758e-17	Homeobox and leucine zipper protein Homez	Q8K3E9
HOST_DN59818_c0_g1_i1	1.44585	0.00810717	Tripartite motif-containing protein 16	Q99PP9; Q7TPY6; Q8C332; Q8C6V0
HOST_DN69459_c0_g1_i1	1.44578	3.10357e-31	Phosphoglycerate mutase 1	Q5ZLN1; P84174
HOST_DN75531_c5_g1_i1	1.44575	4.88573e-38	14-3-3 protein beta/alpha-1	Q6UFZ9
HOST_DN71903_c0_g1_i4	1.44392	7.43972e-15	CTTNBP2 N-terminal-like protein	Q99LJ0; Q6ZPR0; Q8BSV1; Q922L8
HOST_DN69772_c0_g1_i2	1.44359	0.00543429	Ankyrin repeat and SOCS box protein 13	Q8WXK3; A8K7Q6; D3DRR2; Q96EP7; Q9H8Z1
HOST_DN73633_c0_g1_i2	1.4431	1.89867e-07	Fanconi anemia group D2 protein	Q9BXW9; Q2LA86; Q69YP9; Q6PJN7; Q9BQ06; Q9H9T9
HOST_DN77321_c5_g1_i4	1.44293	3.26222e-08	Protein tilB homolog	B3DH20; Q6IVV9
HOST_DN68621_c0_g1_i5	1.44276	8.53937e-13	Adhesion G protein-coupled receptor G3	Q8R0T6; Q3U2Q3
HOST_DN73613_c0_g1_i3	1.44253	7.32342e-10	Magnesium transporter NIPA1	Q8BHK1
HOST_DN78793_c1_g2_i3	1.44177	1.46033e-08	NGFI-A-binding protein 1	Q13506; O75383; O75384; Q6GTU1; Q9UEV1
HOST_DN74056_c5_g1_i10	1.44161	1.3998e-13	Microtubule-associated serine/threonine-protein kinase 4	Q811L6; E9QAH7; Q3UVE7; Q62489; Q6ZQE0; Q8BME3
HOST_DN66195_c0_g1_i1	1.43769	3.53965e-06
HOST_DN80240_c1_g1_i1	1.43704	4.62455e-32	Protein VAC14 homolog	Q66L58
HOST_DN73030_c0_g1_i8	1.43622	6.32136e-08	Aminopeptidase O	P69527
HOST_DN80176_c3_g1_i2	1.43586	7.52577e-37
HOST_DN75937_c3_g1_i1	1.43406	0.00071628
HOST_DN80142_c6_g1_i4	1.43365	6.32045e-15	NF-kappa-B inhibitor epsilon	O54910; Q3U686; Q9CZZ9; Q9D7U3
HOST_DN77197_c1_g5_i1	1.43337	0.000616322
HOST_DN73631_c4_g1_i1	1.43225	7.81776e-27	Max dimerization protein 1	Q0VFI9
HOST_DN76681_c3_g1_i4	1.43197	4.77051e-15	Eukaryotic translation initiation factor 4E	P48597
HOST_DN78053_c3_g1_i1	1.43187	4.97692e-22	Bystin	Q5E9N0; B0JYL5
HOST_DN77976_c0_g1_i1	1.43174	2.00178e-33	Prestin	Q9JKQ2
HOST_DN77681_c0_g6_i1	1.43123	8.73385e-15	Exportin-1	O14980; A6NL14; A8K1K5; D6W5E2; Q63HP8; Q68CP3; Q99433
HOST_DN73111_c0_g1_i4	1.43066	0.000229715	Collagen alpha-2(XI) chain	Q64739; Q61432; Q9Z1W0
HOST_DN77113_c2_g8_i1	1.43029	0.000472806
HOST_DN76043_c6_g2_i1	1.42992	2.24042e-06	Proline-rich protein 33	Q8C494
HOST_DN139989_c0_g1_i1	1.42913	2.88256e-26
HOST_DN72160_c0_g1_i2	1.42758	7.18454e-39	Regulator of G-protein signaling 1	Q9JL25; Q3TBD1; Q3TC18; Q3TD56; Q3U477
HOST_DN77123_c1_g1_i2	1.42718	0.000820246	Tensin-2	Q8NFF9; Q8NFG0; Q96P25; Q9NT29; Q9UPS7
HOST_DN68858_c0_g3_i1	1.42697	1.99757e-06	Ceramide synthase 2	Q96G23; D3DV06; Q5SZE5; Q9HD96; Q9NW79
HOST_DN76791_c0_g3_i3	1.42648	7.85761e-22	Anoctamin-1	Q8BHY3; Q6P5C6; Q8BI26; Q99JK1
HOST_DN77104_c3_g1_i1	1.42645	0.000130211	Coiled-coil domain-containing protein 85B	Q6PDY0
HOST_DN77008_c4_g1_i2	1.4258	9.75693e-23	ATP-citrate synthase	Q91V92
HOST_DN67800_c0_g2_i1	1.42573	0.00825759	C-X-C chemokine receptor type 2	P35344
HOST_DN71437_c1_g1_i3	1.42549	3.55401e-09	Collectin-12	A6QP79
HOST_DN73979_c6_g1_i1	1.42437	2.10728e-25	Serine hydroxymethyltransferase, mitochondrial	P34897; B7Z9F1; E7EQ19; E7EU43; O00740; Q8N1A5
HOST_DN7543_c0_g1_i1	1.42294	0.00202249
HOST_DN75648_c0_g1_i7	1.42272	5.60179e-21	Tubulin alpha-1B chain	Q5R1W4
HOST_DN79571_c0_g1_i3	1.42236	3.31195e-11	Protein FAM111A	Q96PZ2; A8K5Y8; Q5RKS9; Q5XKM2; Q68DK9; Q6IPR7; Q9H5Y1
HOST_DN79365_c0_g1_i1	1.42225	8.31624e-75	T-complex protein 1 subunit alpha	Q9W790
HOST_DN77306_c1_g1_i3	1.42186	3.00588e-25	Suppression of tumorigenicity 5 protein	Q924W7; Q05BD9; Q78H54; Q8K2P3; Q924W8
HOST_DN77636_c2_g1_i4	1.42031	1.28475e-15	Cell adhesion molecule 1	Q9Z2H8
HOST_DN75236_c2_g1_i2	1.41939	4.52778e-06	Serine/threonine-protein kinase 38-like	Q9Y2H1; A8K4U0; B4E3J8; Q8TBX7
HOST_DN76924_c1_g6_i5	1.41935	3.14349e-12	HemK methyltransferase family member 1	Q921L7; B0QZU8
HOST_DN80018_c1_g1_i5	1.41861	5.42404e-12	Importin-4	Q8TEX9; B2RN95; Q2NL96; Q86TZ9; Q8NCG8; Q96SJ3; Q9BTI4; Q9H5L0
HOST_DN80248_c4_g3_i1	1.4184	9.01242e-08	Asc-type amino acid transporter 1	P63116; Q9CW25; Q9JMH8
HOST_DN79203_c11_g1_i1	1.41824	0.00541993	Hemoglobin subunit alpha-B	Q9PVM3
HOST_DN74627_c0_g1_i1	1.41809	8.1985e-25	FERM domain-containing protein 6	Q96NE9; D3DSB9; Q5HYF2; Q8N2X1; Q8WUH7
HOST_DN75430_c7_g4_i1	1.41734	0.00366839	E3 ubiquitin-protein ligase pellino homolog 1	Q8C669; Q91YL9; Q9CV22; Q9ERJ8
HOST_DN77501_c4_g4_i1	1.41706	2.50891e-09
HOST_DN80679_c9_g4_i2	1.41672	1.49918e-25	Serine/threonine-protein kinase 40	Q7T0B1
HOST_DN80390_c0_g3_i1	1.41663	5.14546e-56	Interferon alpha/beta receptor 1a	K7NA32
HOST_DN79426_c0_g2_i3	1.41518	1.33809e-05	CD209 antigen-like protein E	Q91ZW7
HOST_DN73006_c0_g1_i1	1.41489	8.89013e-12	E3 ubiquitin-protein ligase TRIM21	P19474; Q5XPV5; Q96RF8
HOST_DN75606_c2_g6_i6	1.41439	4.33452e-49	Fructose-bisphosphate aldolase A {ECO:0000303|PubMed:23786287}	B5DGM7; B5DGM8; B5DGM9; B5RIB3
HOST_DN80031_c2_g2_i2	1.41413	1.18929e-15	Ubiquitin carboxyl-terminal hydrolase 14	P40826
HOST_DN66842_c0_g1_i3	1.41302	1.20753e-32	Succinate dehydrogenase assembly factor 2, mitochondrial {ECO:0000255|HAMAP-Rule:MF_03057}	A3KP74
HOST_DN68493_c0_g1_i2	1.41242	1.35701e-23
HOST_DN73176_c0_g1_i1	1.41183	3.23235e-14	Mitochondrial import inner membrane translocase subunit TIM50	Q6NWD4; Q6PFK0
HOST_DN78066_c1_g1_i4	1.40965	4.53955e-23	Profilin-2	Q9JJV2; Q3TPT7; Q3V171; Q9ES48; Q9ES49; Q9ES50
HOST_DN1241_c0_g1_i1	1.40942	0.00113226
HOST_DN80482_c0_g1_i1	1.40873	1.32561e-10	[F-actin]-monooxygenase mical1	E7F9T0; F1R7H4
HOST_DN77794_c1_g1_i1	1.40848	1.41954e-26	MKL/myocardin-like protein 1	Q8K4J6; Q642U1
HOST_DN74778_c5_g1_i2	1.40837	6.49444e-21	Fibronectin type III domain-containing protein 3B	Q8IXB2; Q8NBU7; Q96D78; Q9H5I7; Q9NSQ8
HOST_DN95548_c0_g1_i1	1.40795	1.31524e-10	Helicase with zinc finger domain 2	E9QAM5; B9A0U1
HOST_DN159247_c0_g1_i1	1.40767	4.18265e-18
HOST_DN79887_c2_g1_i1	1.4074	1.66273e-47	Apoptosis regulator BAX	O02703
HOST_DN76529_c5_g2_i1	1.40642	3.18531e-06	EH domain-binding protein 1-like protein 1	Q8N3D4; Q8TB89; Q9H7M7
HOST_DN73109_c0_g1_i2	1.40636	1.15014e-23	Transaldolase	Q9EQS0; Q6PCV1
HOST_DN75408_c1_g1_i1	1.40617	3.38286e-25
HOST_DN79285_c2_g2_i1	1.40585	1.73299e-17
HOST_DN78252_c2_g1_i1	1.40497	2.57571e-47	Puromycin-sensitive aminopeptidase	Q11011; Q3UZE0; Q5PR74; Q91VJ8
HOST_DN76639_c4_g1_i1	1.40373	6.64033e-11	Ornithine decarboxylase	P27117; A6H7E8
HOST_DN71921_c0_g3_i1	1.40338	1.02819e-53	Eukaryotic initiation factor 4A-I	P60843; P04765; Q61516
HOST_DN80789_c4_g1_i1	1.40317	3.3174e-32	Growth hormone-inducible transmembrane protein	Q9H3K2; A8K9Z9; D3DWE0; O95894; Q5VT95; Q9H0P2
HOST_DN125784_c0_g1_i1	1.40301	0.000584211
HOST_DN79699_c3_g1_i1	1.40206	1.24571e-17	Filamin-binding LIM protein 1	Q5REN1
HOST_DN74938_c3_g3_i1	1.40201	0.000215972
HOST_DN70341_c0_g1_i1	1.4019	1.3545e-20	28 kDa heat- and acid-stable phosphoprotein	Q13442; D6W5S5; Q92906
HOST_DN77719_c4_g3_i1	1.40165	6.19644e-26
HOST_DN75656_c4_g1_i2	1.40161	2.58693e-31	45 kDa calcium-binding protein	Q7ZUC2
HOST_DN74990_c1_g2_i4	1.40156	7.26746e-29	Palmitoyltransferase ZDHHC15B	F1QXD3
HOST_DN38156_c0_g1_i1	1.40134	0.00165393
HOST_DN76760_c2_g5_i1	1.40012	1.02857e-23	Microtubule-associated protein RP/EB family member 1	Q66HR2
HOST_DN70169_c0_g1_i1	1.39635	1.52447e-06
HOST_DN38871_c0_g1_i1	1.39562	0.00265457	Protein asteroid homolog 1	Q1LYL8; B3DJH6
HOST_DN78406_c1_g1_i4	1.39478	2.9643e-19	Integrin beta-4	Q9UIQ4
HOST_DN75882_c2_g1_i2	1.39372	5.55574e-10	Helicase with zinc finger domain 2	Q9BYK8; Q3C2G2; Q4VXQ1; Q8TEF3; Q96ND3; Q9C094
HOST_DN80776_c3_g1_i3	1.39365	4.16157e-15
HOST_DN77637_c1_g2_i5	1.39236	4.3119e-19	Inosine-5'-monophosphate dehydrogenase 2 {ECO:0000255|HAMAP-Rule:MF_03156}	B0UXP9
HOST_DN69739_c0_g1_i1	1.39204	6.81488e-19	26S proteasome non-ATPase regulatory subunit 14	O35593; Q3UB50; Q9CZY6
HOST_DN68858_c0_g1_i1	1.39145	4.74008e-06	Ceramide synthase 2	Q3ZBF8
HOST_DN66683_c0_g1_i1	1.39065	0.00222935
HOST_DN79527_c4_g8_i2	1.38854	2.80604e-09	Protein CYR61	A5A6L1
HOST_DN77845_c0_g3_i8	1.388	7.59783e-06	DENN domain-containing protein 3	A2RUS2; B7ZM28; O94947; Q2TAM7; Q6ZMS6; Q96DK3
HOST_DN77057_c0_g1_i1	1.38795	7.15945e-12	Sorting nexin-18	Q91ZR2
HOST_DN80056_c7_g1_i2	1.3875	1.93159e-12	Amyloid-beta A4 precursor protein-binding family A member 1	Q02410; O14914; O60570; Q5VYR8
HOST_DN80669_c6_g2_i2	1.38724	9.47693e-20	Zinc finger and BTB domain-containing protein 12	Q9Y330; B0UY00; Q5JQ98
HOST_DN74107_c0_g1_i4	1.38574	7.6217e-35	Interleukin-1 receptor type 1	P14778; Q587I7
HOST_DN77533_c4_g1_i1	1.38574	7.34052e-21	Serine/threonine-protein kinase PAK 3	Q62829
HOST_DN81161_c4_g1_i1	1.38543	1.94832e-33	Toll-interacting protein	Q7ZV43; Q6NYL4
HOST_DN74794_c6_g1_i1	1.38508	5.65967e-07
HOST_DN78156_c4_g1_i1	1.38489	1.0823e-20	Piezo-type mechanosensitive ion channel component 1	Q92508; A6NHT9; A7E2B7; Q0KKZ9
HOST_DN77457_c8_g1_i4	1.38433	2.54934e-28	Mitochondrial import inner membrane translocase subunit Tim17-A	Q99595; B2RDM5; Q9BWF5
HOST_DN45425_c0_g2_i1	1.3843	1.17103e-10	Helicase with zinc finger domain 2	Q9BYK8; Q3C2G2; Q4VXQ1; Q8TEF3; Q96ND3; Q9C094
HOST_DN80105_c3_g1_i1	1.38416	9.05626e-19
HOST_DN65329_c0_g1_i1	1.38356	7.27386e-12	PAK4-inhibitor inka2 {ECO:0000305}	F1QPR4; Q7SXD0
HOST_DN76973_c1_g1_i1	1.3833	2.47677e-27
HOST_DN60377_c0_g2_i1	1.38192	5.47764e-07	Aquaporin-3	Q8R2N1; Q3TU75; Q9JJN8; Q9WTJ3
HOST_DN72469_c0_g1_i2	1.38099	7.61092e-73	T-complex protein 1 subunit theta	Q6EE31
HOST_DN78866_c1_g1_i1	1.3802	2.74995e-09	Malate dehydrogenase, cytoplasmic	P11708; Q29560
HOST_DN91655_c0_g1_i1	1.37992	5.6118e-06
HOST_DN79660_c2_g8_i1	1.37922	2.61701e-11
HOST_DN76791_c0_g4_i1	1.37887	6.6615e-21
HOST_DN74339_c0_g1_i2	1.37885	7.8109e-47	EH domain-containing protein 1 {ECO:0000305}	Q5E9R3; Q0V8R8; Q1RMK8
HOST_DN79592_c1_g1_i5	1.37857	3.73151e-47	Guanine nucleotide-binding protein G(i) subunit alpha-1	P27044; Q6GPC5
HOST_DN71515_c0_g2_i1	1.37727	0.000858387	Coiled-coil domain-containing protein 175	E9PVB3
HOST_DN78675_c8_g2_i2	1.37723	9.57037e-26	TLD domain-containing protein 2	A0PJX2; B3KVU8
HOST_DN78450_c0_g1_i1	1.37717	3.9114e-13
HOST_DN77182_c2_g1_i1	1.37659	1.63374e-06	Switch-associated protein 70	Q6A028; O88443; Q3TQR6; Q3UCA3; Q6P1D0
HOST_DN65605_c0_g1_i1	1.3764	6.51759e-49	Malate dehydrogenase, mitochondrial	P40926; A8K414; B2RE78; B4DE44; E9PDB2; O43682
HOST_DN76932_c6_g1_i1	1.37628	0.00677445	Olfactory receptor 2A12	Q8NGT7; A4D2G4; Q6IF43
HOST_DN75812_c0_g1_i2	1.37561	5.15693e-27	Uroporphyrinogen decarboxylase	Q9PTS2
HOST_DN69779_c0_g1_i1	1.37524	7.71952e-12	Mitochondrial import receptor subunit TOM40 homolog	Q6P825
HOST_DN70569_c0_g1_i4	1.37519	1.34656e-48	E3 ubiquitin-protein ligase RNF185	Q91YT2; Q6ZWS3
HOST_DN45648_c0_g1_i1	1.37511	3.83896e-19	Lysophosphatidic acid receptor 6	Q4G072
HOST_DN156119_c0_g1_i1	1.37481	2.92765e-13	Transcription factor Sp8	Q6P0J3; Q6ED30
HOST_DN81087_c1_g4_i3	1.37435	0.00579771	Spectrin beta chain, non-erythrocytic 1	Q01082; B2RP63; O60837; Q16057; Q53R99; Q59ER3; Q8IX99
HOST_DN72902_c0_g1_i2	1.37388	2.54217e-27	Glyoxalase domain-containing protein 5	Q502D1
HOST_DN75315_c0_g1_i1	1.37316	0.000748772	Androgen receptor	Q8MIK0
HOST_DN79816_c7_g1_i4	1.37133	0.000805019	Major facilitator superfamily domain-containing protein 4B {ECO:0000250|UniProtKB:Q7SXB7}	A9JTG4
HOST_DN79747_c4_g1_i7	1.37126	2.10338e-09	StAR-related lipid transfer protein 5	A1A4M6
HOST_DN73882_c0_g1_i2	1.3712	5.18185e-41	Erlin-2 {ECO:0000250|UniProtKB:O94905}	A3QK16
HOST_DN61610_c0_g1_i1	1.37057	3.21472e-08	Methyltransferase-like protein 7A	Q9H8H3; Q9H7R3; Q9UHZ7; Q9Y422
HOST_DN76386_c2_g3_i3	1.37047	0.000370611	Elongation factor 1-beta	Q9YGQ1
HOST_DN74692_c3_g1_i1	1.37022	1.13249e-50	Heat shock cognate 70 kDa protein	P08108
HOST_DN59281_c0_g1_i1	1.37011	1.1534e-06
HOST_DN79753_c2_g1_i1	1.37002	9.15747e-09	Choline transporter-like protein 5-B	B0S5A7
HOST_DN73453_c0_g1_i5	1.36889	0.000124346
HOST_DN76170_c2_g2_i2	1.36791	9.19098e-24	Thiamine transporter 1 {ECO:0000303|PubMed:11481326}	Q9EQN9; Q8BRH5; Q8R4Y1
HOST_DN79500_c1_g1_i1	1.36768	4.53001e-09	Elongation of very long chain fatty acids protein 7 {ECO:0000255|HAMAP-Rule:MF_03207, ECO:0000305}	D4ADY9
HOST_DN75283_c5_g1_i5	1.36616	1.74906e-13	Protein FAM49B	Q9NUQ9; Q96AZ5; Q9NW21; Q9NZE7
HOST_DN81451_c10_g2_i1	1.36611	3.21105e-17
HOST_DN74978_c4_g1_i1	1.36564	3.08412e-34	Proline-rich protein 5	Q812A5; Q5EAK2; Q8BIE7; Q8BIK1; Q8R1A0
HOST_DN75408_c3_g1_i1	1.36505	1.4809e-25	Mesothelin-like protein	Q96KJ4
HOST_DN75859_c1_g1_i1	1.36492	7.75464e-35	NACHT, LRR and PYD domains-containing protein 12	P59046; A8MTQ2; B3KTE7; Q8NEU4; Q9BY26
HOST_DN72738_c0_g2_i1	1.36414	1.37656e-29	Cytochrome b-c1 complex subunit 10	Q9CPX8; Q3TFX1
HOST_DN72551_c0_g1_i3	1.36366	7.99638e-05	Ras-related protein Rab-33B	Q5ZHV1
HOST_DN75651_c8_g2_i1	1.36298	6.17894e-06
HOST_DN109390_c0_g1_i1	1.36287	0.00690323	Retrovirus-related Pol polyprotein from transposon 297	P20825
HOST_DN70312_c0_g1_i3	1.36253	2.91017e-47	Ras-related protein Rab-18	Q5EB77
HOST_DN77195_c2_g1_i1	1.36252	4.72256e-06
HOST_DN73020_c0_g1_i1	1.36232	3.47315e-07
HOST_DN75918_c4_g2_i1	1.36217	1.55253e-12	E3 ubiquitin-protein ligase RNF19B	Q1L8L6
HOST_DN69995_c0_g2_i1	1.36043	2.532e-10
HOST_DN75530_c4_g2_i1	1.36043	5.35859e-15
HOST_DN70107_c0_g1_i2	1.36039	3.349e-16	Mitochondrial ornithine transporter 1	Q9Y619; Q5VZD8; Q9HC45
HOST_DN66782_c0_g1_i1	1.36011	2.97498e-05
HOST_DN74973_c0_g1_i2	1.35803	0.000211995	Transmembrane protein 65	Q0VCH8
HOST_DN75891_c0_g1_i1	1.35754	0.00193113	Sorting and assembly machinery component 50 homolog B	Q5U3I0
HOST_DN62001_c0_g2_i1	1.35722	0.000624899	Tyrosinase	P55025
HOST_DN74473_c1_g1_i1	1.35603	6.53282e-10
HOST_DN77448_c1_g1_i8	1.35582	4.92493e-12	Cyclin-G2	Q16589; B4DF25; Q6FGA7; Q6FGC6
HOST_DN79649_c5_g2_i1	1.35547	5.46241e-13	Sialin	Q9NRA2; Q5SZ76; Q8NBR5; Q9UGH0
HOST_DN81021_c5_g1_i3	1.35502	1.52583e-09	Very-long-chain 3-oxoacyl-CoA reductase-A {ECO:0000305}	Q6P3L6; Q7ZUN4
HOST_DN77949_c2_g11_i2	1.35447	4.33303e-53	RNA polymerase II elongation factor ELL	P55199
HOST_DN77936_c2_g1_i9	1.35255	0.000517263	Fucolectin	Q7SIC1
HOST_DN75047_c2_g3_i6	1.35216	2.76875e-24	T-complex protein 11-like protein 1	Q9NUJ3; D3DR01; Q8IVX4
HOST_DN75898_c2_g1_i4	1.35205	1.52739e-07
HOST_DN77700_c0_g1_i1	1.35188	0.00272917	Glycoprotein-N-acetylgalactosamine 3-beta-galactosyltransferase 1	Q9NS00; Q96QH4; Q9BTU1
HOST_DN74524_c7_g1_i2	1.35179	9.04629e-27	Guanine nucleotide-binding protein G(I)/G(S)/G(O) subunit gamma-5	P63219; P30670; Q61015
HOST_DN79270_c2_g1_i8	1.35153	1.97861e-08	E3 ubiquitin-protein ligase TRAIP	Q8VIG6; O08854; Q922M8; Q9CPP4
HOST_DN71095_c1_g1_i1	1.35105	2.56692e-11	Protein THEM6	B0JZP3; B0V2T1
HOST_DN78608_c0_g2_i2	1.35085	3.47063e-15	Lipoyltransferase 1, mitochondrial	Q9Y234; Q4ZFZ1
HOST_DN75669_c3_g2_i5	1.34962	3.02327e-31	Nicotinamide/nicotinic acid mononucleotide adenylyltransferase 1 {ECO:0000305}	Q0VD50
HOST_DN81393_c1_g1_i7	1.34906	5.78694e-14	Transposable element Tcb1 transposase	P35072
HOST_DN75403_c1_g1_i1	1.34895	0.000825012	Solute carrier family 22 member 13	Q6A4L0; E9QP74; Q8VC89
HOST_DN68708_c0_g1_i1	1.34829	0.00259768
HOST_DN73602_c0_g1_i3	1.34773	8.49352e-11	Protein-cysteine N-palmitoyltransferase HHAT-like protein	Q9HCP6; Q8TBG3; Q9ULP7
HOST_DN74064_c3_g1_i2	1.34767	0.00142051	Glutamate receptor ionotropic, NMDA 2B	Q13224; Q12919; Q13220; Q13225; Q14CU4; Q9UM56
HOST_DN70623_c0_g1_i2	1.34737	2.61275e-24	Transmembrane protein 33	P57088; B3KSS8; Q9H953
HOST_DN79165_c2_g2_i1	1.34723	6.36624e-20	Glucose-fructose oxidoreductase domain-containing protein 1	Q6P4M5
HOST_DN76033_c2_g2_i1	1.34558	9.01648e-05
HOST_DN69995_c0_g1_i1	1.3454	4.09515e-08	Inhibin beta B chain	P27093; O73796
HOST_DN77045_c4_g5_i2	1.34508	7.39732e-55
HOST_DN74152_c3_g1_i1	1.34472	1.72705e-11	Retinol dehydrogenase 11	Q9Y391
HOST_DN77062_c2_g1_i1	1.3441	6.73266e-19	FH2 domain-containing protein 1	Q9C0D6
HOST_DN74876_c3_g5_i4	1.34395	4.29208e-26	Eukaryotic translation initiation factor 5	P55010; Q53XB3; Q9H5N2; Q9UG48
HOST_DN80435_c2_g2_i7	1.34256	3.49758e-06	MAM and LDL-receptor class A domain-containing protein 2	B3EWZ6
HOST_DN76918_c4_g1_i4	1.34247	8.3988e-18	NADH dehydrogenase [ubiquinone] 1 beta subcomplex subunit 6	P0CB93; Q0MQD9; Q5RBV5
HOST_DN80333_c1_g1_i2	1.34132	4.23773e-06
HOST_DN75172_c2_g9_i1	1.34127	4.58941e-07
HOST_DN75608_c2_g2_i1	1.34098	8.5084e-42	Phosphoglucomutase-1	Q96J40; Q9NTY4
HOST_DN77605_c2_g2_i9	1.3409	2.39023e-33	Endothelin-converting enzyme 1	Q4PZA2; B1AXF9; Q4PZ99; Q4PZA1; Q6P9Q9
HOST_DN79127_c1_g2_i1	1.34052	1.87276e-19	Myotubularin-related protein 5	Q9UGB8
HOST_DN72548_c1_g1_i1	1.34011	3.07074e-76	T-complex protein 1 subunit epsilon	Q4R6V2
HOST_DN78348_c6_g1_i1	1.33905	8.78795e-10	Uncharacterized protein KIAA1958 homolog	Q8C4P0; B1AX79; Q8BN62; Q8K1X8
HOST_DN75293_c5_g1_i1	1.33791	3.17744e-08	EGF-containing fibulin-like extracellular matrix protein 2	Q9WVJ9
HOST_DN72312_c0_g1_i1	1.33731	1.70981e-24	DnaJ homolog subfamily C member 30	P59041
HOST_DN73074_c0_g1_i1	1.33701	0.00183409
HOST_DN76447_c3_g4_i1	1.3369	1.223e-44
HOST_DN79799_c1_g3_i1	1.33664	2.47493e-24	Transposable element Tc1 transposase	P03934; Q23636
HOST_DN75169_c2_g1_i1	1.33628	1.16876e-19	Transmembrane protein 41B	A1A5V7
HOST_DN72690_c0_g4_i1	1.33557	2.3694e-22	26S proteasome regulatory subunit 10B	P62334; P49719; Q3TKK1; Q810A6; Q92524; Q9CXH9
HOST_DN77998_c7_g3_i1	1.33493	0.00274915	Hemicentin-1	Q96RW7; A6NGE3; Q5TYR7; Q96DN3; Q96DN8; Q96SC3
HOST_DN74415_c2_g1_i1	1.33417	6.26983e-10	Maternal B9.15 protein	P40745; Q5M785
HOST_DN79501_c1_g3_i1	1.33399	4.71514e-05	DnaJ homolog subfamily C member 5 {ECO:0000250|UniProtKB:Q9H3Z4}	O42196
HOST_DN74346_c1_g1_i1	1.3339	0.00029176	Bifunctional methylenetetrahydrofolate dehydrogenase/cyclohydrolase, mitochondrial	Q5ZKA5
HOST_DN80737_c0_g2_i1	1.3337	4.36817e-13	Inactive ubiquitin carboxyl-terminal hydrolase 54	Q6ZTM0; Q8N1X2
HOST_DN76475_c2_g7_i1	1.3337	1.88655e-41	Septin-2A	Q5BKN4
HOST_DN76556_c3_g1_i1	1.33328	6.39728e-22
HOST_DN81229_c9_g3_i1	1.33204	1.22218e-18
HOST_DN75901_c1_g1_i9	1.33139	4.21633e-05	Interleukin-17 receptor B	Q9NRM6; Q9BPZ0; Q9NRL4; Q9NRM5
HOST_DN79374_c5_g1_i2	1.32904	2.17485e-07
HOST_DN79336_c0_g1_i4	1.32833	4.98142e-29	Glycogen debranching enzyme	Q9UF08
HOST_DN76114_c7_g1_i3	1.32792	1.55202e-32	Tetraspanin-8	Q8R3G9
HOST_DN80441_c5_g1_i6	1.32768	1.42305e-22	Sterol regulatory element-binding protein 2	A3KNA7
HOST_DN77904_c3_g1_i9	1.32745	3.92949e-18	Ubiquitin-associated domain-containing protein 2	Q4R910
HOST_DN80305_c2_g4_i3	1.32719	0.00876349	C-type lectin domain family 4 member E	Q67EQ1; Q56TZ4
HOST_DN77235_c2_g3_i1	1.32706	1.13202e-10	Transcription factor MafK	Q61827; Q60600
HOST_DN78803_c2_g1_i1	1.32648	3.26064e-06
HOST_DN77447_c2_g2_i1	1.32586	4.21416e-13	Exportin-1	Q6P5F9
HOST_DN81123_c4_g5_i2	1.32509	0.000622837	Ceramide synthase 2	Q3ZBF8
HOST_DN79139_c2_g2_i1	1.32498	9.1915e-27	Carcinoembryonic antigen-related cell adhesion molecule 5	P06731; H9KVA7
HOST_DN80286_c1_g1_i2	1.32427	3.04058e-08	MAP kinase-activated protein kinase 3	Q16644; B5BU67
HOST_DN39855_c0_g1_i1	1.32427	0.00034819
HOST_DN76779_c0_g1_i1	1.32397	0.0030242
HOST_DN78378_c3_g2_i4	1.32367	1.2626e-08	3 beta-hydroxysteroid dehydrogenase type 7	Q9EQC1; A2RTR5
HOST_DN78888_c1_g2_i1	1.32317	0.000118481	Insulin receptor substrate 2-B	Q5RJW5
HOST_DN76373_c2_g2_i5	1.3225	1.9085e-39	Serine/threonine-protein kinase pim-1	Q95LJ0
HOST_DN77179_c3_g1_i1	1.32224	4.95307e-16	Heat shock 70 kDa protein 4	Q5RDM4
HOST_DN77061_c5_g1_i4	1.32128	3.02118e-17	Transmembrane protein 147	Q6DGL7
HOST_DN75209_c3_g1_i3	1.32124	2.09093e-46	Proprotein convertase subtilisin/kexin type 7	Q16549; B0YJ60; Q3C1X1; Q53GM4; Q96FK8; Q9UL57
HOST_DN77299_c4_g3_i2	1.32122	0.000200003	Transient receptor potential cation channel subfamily M member 7 {ECO:0000312|RGD:620053}	Q925B3; A7L642
HOST_DN139686_c0_g1_i1	1.32115	0.00017966	High-affinity choline transporter 1	Q8UWF0
HOST_DN76294_c1_g1_i1	1.321	7.04414e-14	Thymic stromal cotransporter homolog	Q9BY10; B1ALK1; Q86VT0; Q96NE2
HOST_DN74948_c3_g2_i2	1.32058	3.27314e-18	Coenzyme Q-binding protein COQ10 homolog A, mitochondrial	Q6DFA6
HOST_DN77255_c3_g1_i6	1.31955	5.52272e-18	26S proteasome non-ATPase regulatory subunit 3	P14685; Q3TP95; Q99LL7
HOST_DN79921_c1_g2_i1	1.31883	2.87814e-18	ATP-binding cassette sub-family A member 1	P41233; B1AWZ8
HOST_DN78468_c1_g9_i2	1.3185	1.03743e-36	RNA polymerase II elongation factor ELL2	Q3UKU1; E9QPE1
HOST_DN76779_c5_g2_i6	1.31779	1.96765e-25	Protein NDRG3	Q9QYF9
HOST_DN71074_c0_g2_i6	1.31767	4.60101e-25	Phospholipid hydroperoxide glutathione peroxidase {ECO:0000303|PubMed:2386798, ECO:0000303|PubMed:8135530}	P36968
HOST_DN75650_c6_g1_i1	1.31765	2.32503e-33	Perilipin-3	O60664; A8K4Y9; K7EQF4; Q53G77; Q9BS03; Q9UBD7; Q9UP92
HOST_DN74129_c4_g3_i2	1.31761	6.35008e-33	Natural resistance-associated macrophage protein 2	P49282; O54903; Q3UFV5; Q8BJL2; Q8BWV3; Q8CFA0; Q8VCU6
HOST_DN76538_c1_g3_i5	1.31751	2.25583e-31	Echinoderm microtubule-associated protein-like 4	Q6DIP5
HOST_DN78252_c4_g1_i1	1.31701	0.00322379	Puromycin-sensitive aminopeptidase	P55786; B7Z463; Q6P145; Q9NP16; Q9UEM2
HOST_DN74655_c1_g1_i3	1.31655	1.09969e-33	TNFAIP3-interacting protein 1	Q96EL9; Q99833; Q9H1J3
HOST_DN77470_c2_g4_i2	1.3161	2.77028e-15	Adrenodoxin, mitochondrial	P13216
HOST_DN79706_c1_g1_i3	1.31584	4.31596e-29	Paxillin	P49024
HOST_DN67593_c0_g1_i1	1.31481	0.00158931
HOST_DN66562_c0_g1_i1	1.31435	1.62348e-21	Bryoporin {ECO:0000303|PubMed:19674339}	Q5UCA8; A9TTZ8
HOST_DN80705_c1_g4_i1	1.31342	4.69136e-07
HOST_DN74491_c6_g1_i1	1.31292	8.96392e-14	Transmembrane protein 238	A9JSM3
HOST_DN79647_c0_g2_i1	1.3129	2.00838e-22	Adenosine 3'-phospho 5'-phosphosulfate transporter 1	Q7Z2G3; Q8NBK6; Q96AR6
HOST_DN80056_c3_g1_i2	1.31279	1.03886e-27	ATP-binding cassette sub-family F member 1	Q8NE71; A2BF75; O14897; Q69YP6
HOST_DN76985_c4_g1_i5	1.31141	4.77766e-05
HOST_DN71787_c0_g2_i4	1.31049	0.00273225	Guanine deaminase	Q9Y2T3; B4DTY5; Q5SZC7; Q9H335; Q9ULG2
HOST_DN74648_c5_g1_i2	1.31037	1.00645e-36	Methylmalonic aciduria and homocystinuria type D protein, mitochondrial	Q9H3L0; B2R895; D3DP91; O95891
HOST_DN80461_c10_g2_i2	1.30994	8.67006e-13	B-cell lymphoma 3 protein homolog	Q9Z2F6
HOST_DN74671_c0_g1_i1	1.3089	2.47103e-08	Transcription regulator protein BACH1	P97302
HOST_DN78286_c0_g1_i3	1.30689	3.42882e-16	Mitochondrial proton/calcium exchanger protein {ECO:0000305}	Q1LY46; B8JIA3
HOST_DN79258_c2_g2_i1	1.30683	8.93659e-13	MAP kinase-activated protein kinase 3	Q16644; B5BU67
HOST_DN77747_c5_g2_i2	1.30657	1.24252e-18	Transcription activator BRG1	P51532; B1A8Z4; B1A8Z5; B1A8Z6; B1A8Z7; E9PBR8; O95052; Q9HBD3
HOST_DN75989_c2_g1_i2	1.30613	8.17902e-05
HOST_DN71081_c0_g1_i1	1.30532	1.86324e-12	Protein arginine N-methyltransferase 5	Q5R698
HOST_DN72930_c0_g1_i2	1.30457	8.22056e-26	DnaJ homolog subfamily A member 1	P31689; Q5T7Q0; Q86TL9
HOST_DN73266_c0_g1_i1	1.30407	3.16471e-27	Glycerol-3-phosphate phosphatase {ECO:0000305}	Q8CHP8
HOST_DN80782_c5_g3_i2	1.30175	8.00893e-08	Stonustoxin subunit beta	Q91453; Q98986
HOST_DN78570_c0_g5_i1	1.30156	3.25506e-12
HOST_DN74690_c2_g1_i3	1.30069	1.49621e-08	Protein-methionine sulfoxide oxidase mical3b	F1QWK4; Q1LV75
HOST_DN80315_c3_g1_i3	1.30027	2.83727e-11	Arf-GAP with Rho-GAP domain, ANK repeat and PH domain-containing protein 3	Q8R5G7; E9QMK7; Q5DTN4; Q6NVF1; Q8R5G6
HOST_DN79996_c1_g5_i2	1.30009	7.20457e-25	Eukaryotic peptide chain release factor GTP-binding subunit ERF3A	Q8R050; E9QK49; G3UWC0; O88179; Q8K2E1
HOST_DN80791_c5_g1_i1	1.30006	4.23171e-29	Transposable element Tc1 transposase	P03934; Q23636
HOST_DN77635_c5_g2_i1	1.29963	1.16869e-14	Ribosomal L1 domain-containing protein 1	A4FV97
HOST_DN78295_c3_g1_i3	1.29786	1.92015e-05	Phosphoribosyltransferase domain-containing protein 1	Q9NRG1; B7Z1Z3; Q53HA7; Q59EL9; Q5VV18; Q5VV20
HOST_DN74593_c8_g6_i1	1.29742	8.82024e-09	Homeobox protein SIX4	Q61321; B2RQH3; Q61322; Q61323
HOST_DN80643_c0_g1_i6	1.29701	5.63547e-07
HOST_DN73306_c0_g2_i3	1.29693	0.00111344	Calmodulin-regulated spectrin-associated protein 3 {ECO:0000305}	U5LK70; U5LK74; U5LK79
HOST_DN116558_c0_g1_i1	1.29673	7.30187e-05
HOST_DN75437_c2_g1_i2	1.29631	2.19552e-32	Ras-related protein Rab-21	P35282; Q7TPN7
HOST_DN71991_c0_g1_i1	1.29595	1.00442e-19	G patch domain-containing protein 3	Q96I76; Q5JYH2; Q8NDJ2; Q9H9Z3
HOST_DN72603_c0_g3_i1	1.29595	2.9389e-09	Nucleolin	P20397
HOST_DN77285_c2_g1_i4	1.29481	8.5865e-12	Peroxisome proliferator-activated receptor gamma	Q4U3Q4
HOST_DN77022_c1_g1_i2	1.29438	8.71968e-06	Spermatogenesis-associated protein 1	Q9D5R4; B9EI96; Q7TPN4
HOST_DN75136_c0_g1_i3	1.29361	1.06661e-18	Sterol regulatory element-binding protein 1	Q6PJ36; Q8TAK9
HOST_DN76510_c3_g2_i2	1.29324	6.34254e-10	Probable E3 ubiquitin-protein ligase DTX3	Q80V91; Q4FZD3; Q9ER06
HOST_DN73440_c2_g1_i9	1.29229	1.28186e-17	Amyloid-beta A4 protein	O73683
HOST_DN72453_c0_g1_i1	1.29221	1.14751e-26	Deoxyhypusine hydroxylase {ECO:0000255|HAMAP-Rule:MF_03101}	Q7ZUX6
HOST_DN77515_c3_g2_i4	1.29179	9.99181e-14	Proteasome subunit alpha type-4	P21670
HOST_DN75956_c2_g1_i2	1.2905	3.82755e-09	14-3-3 protein gamma-1	Q6PC29
HOST_DN78551_c2_g1_i2	1.2898	6.79391e-16
HOST_DN73350_c1_g1_i5	1.28925	1.95923e-17	Glutamine--fructose-6-phosphate aminotransferase [isomerizing] 1	P82808; Q5XI08
HOST_DN77663_c2_g1_i2	1.2892	1.70444e-23	Lysophospholipid acyltransferase 7	Q7SZQ0
HOST_DN77513_c2_g1_i3	1.28836	3.22694e-14	Annexin A1	P04083
HOST_DN78176_c1_g1_i1	1.28772	1.36201e-07	CD209 antigen-like protein D	Q91ZW8; Q8VIK4
HOST_DN75943_c0_g1_i7	1.28743	6.45936e-16	NACHT, LRR and PYD domains-containing protein 3	A6QLE5
HOST_DN77410_c2_g1_i1	1.2867	1.02538e-13	Membrane progestin receptor delta {ECO:0000303|PubMed:23763432}	Q8N121; Q8N3M2; Q9H621
HOST_DN75332_c7_g2_i3	1.28636	0.000306057
HOST_DN73977_c0_g1_i1	1.28627	1.93815e-09	Monofunctional C1-tetrahydrofolate synthase, mitochondrial	Q6UB35; Q2TBF3; Q8WVW0; Q96HG8; Q9H789; Q9UFU8
HOST_DN79473_c4_g2_i1	1.28625	5.32866e-18	Protein Shroom2	A2ALU4; Q2EY23; Q8C7N1; Q8CCR2; Q8CDZ0
HOST_DN79409_c5_g1_i2	1.28518	1.31034e-11	Peptidyl-tRNA hydrolase 2, mitochondrial	Q3ZBL5; Q05KI4; Q5BIN3
HOST_DN76341_c4_g5_i1	1.28513	0.00015592	L-rhamnose-binding lectin SML {ECO:0000303|PubMed:17184920}	C0HK23
HOST_DN80615_c5_g1_i3	1.28503	3.01559e-08	RNA-binding protein with multiple splicing	Q93062; D3DSU9; Q92516; Q92517; Q92518; Q96J26
HOST_DN74737_c3_g1_i1	1.28482	4.32148e-14	Myelin protein zero-like protein 2	Q5R804
HOST_DN77814_c0_g1_i2	1.28468	7.6182e-32	Clathrin light chain A	P04973; Q17QD2
HOST_DN75941_c1_g2_i9	1.28447	1.50072e-47	Peptidyl-glycine alpha-amidating monooxygenase A	P08478; B7ZR22; Q5D0B6; Q91697
HOST_DN77513_c4_g1_i9	1.28375	6.87062e-38	Mesoderm induction early response protein 3	Q4R3R9; Q4R718
HOST_DN74175_c0_g1_i2	1.28372	1.53529e-43	Cysteine protease ATG4D	Q8BGV9; Q8C4N9; Q8K0Q2
HOST_DN75499_c5_g1_i1	1.2833	0.000126745	Fucolectin-5	Q9I927
HOST_DN75395_c0_g4_i2	1.28329	3.01366e-25	Dipeptidyl peptidase 9	Q8N2J7; Q8N3F5; Q8WXD8; Q96NT8; Q9BVR3
HOST_DN78663_c3_g2_i3	1.28308	1.56486e-07	Insulin-induced gene 1 protein	Q8AV61
HOST_DN76760_c2_g2_i1	1.28294	2.09513e-14	Pseudokinase FAM20A {ECO:0000305}	Q8CID3
HOST_DN77711_c3_g3_i1	1.28211	5.6096e-20	Piezo-type mechanosensitive ion channel component 1	Q0KL00
HOST_DN80353_c1_g2_i1	1.28172	5.51513e-18	Phospholipase A-2-activating protein	Q9Y263; Q53EU5; Q5VY33; Q9NUL8; Q9NVE9; Q9UF53; Q9Y5L1
HOST_DN72409_c0_g1_i3	1.28108	0.00113948	Acyl-CoA synthetase family member 2, mitochondrial	Q0P4F7
HOST_DN79950_c3_g2_i1	1.281	0.000159144	High affinity choline transporter 1	Q8BGY9; Q99PK3; Q9ESW5
HOST_DN77950_c2_g2_i1	1.27988	1.44236e-25	Exostosin-1b	Q5IGR7
HOST_DN75366_c6_g1_i2	1.27981	4.6806e-31	ATP synthase mitochondrial F1 complex assembly factor 1	Q1L987; Q568A9
HOST_DN70257_c0_g1_i2	1.27893	2.16442e-50	Protoheme IX farnesyltransferase, mitochondrial	Q8CFY5
HOST_DN69630_c0_g1_i3	1.27882	1.22515e-18	Thiosulfate:glutathione sulfurtransferase {ECO:0000303|PubMed:24981631}	Q8NFU3; Q5SY48; Q5SY49; Q5SY50; Q5SY51; Q8NFU2; Q9BV22
HOST_DN156156_c0_g1_i1	1.27871	0.000145453	Retinoid-binding protein 7	Q9EPC5; Q9CTK0
HOST_DN77804_c5_g1_i5	1.27826	1.76302e-13	Tropomyosin alpha-4 chain	P67937; P07226; Q15659; Q9BU85; Q9H8Q3
HOST_DN78484_c4_g1_i5	1.27811	4.99171e-14	[F-actin]-monooxygenase mical1	E7F9T0; F1R7H4
HOST_DN78892_c3_g5_i2	1.27811	1.30005e-26	Tetraspanin-14	Q8QZY6
HOST_DN71997_c0_g1_i1	1.27808	1.08962e-31	Phosphoglucomutase-2	Q96G03; B4E0G8; Q53FP5; Q5QTR0; Q9H0P9; Q9NV22
HOST_DN54334_c0_g1_i1	1.27786	4.07437e-19	Tetratricopeptide repeat protein 4	Q8R3H9
HOST_DN74823_c5_g1_i4	1.27733	5.56049e-23	Hexokinase-2	P27881; Q9QWR1
HOST_DN79170_c3_g3_i2	1.27728	1.95273e-06	Major facilitator superfamily domain-containing protein 12	Q3U481; Q3U376
HOST_DN74416_c7_g2_i1	1.27691	0.000463876
HOST_DN72985_c0_g1_i3	1.27656	3.38609e-28	Phenylalanine--tRNA ligase alpha subunit	Q1JPX3; Q6NYF9
HOST_DN8004_c0_g1_i1	1.27577	0.00221559
HOST_DN44931_c0_g1_i1	1.27562	0.00377223	Ryanodine receptor 1	Q7TNG1; Q80UQ5; Q80X16; Q99JF9
HOST_DN75928_c4_g3_i2	1.27489	1.31613e-24
HOST_DN79322_c2_g2_i2	1.2738	1.81289e-27	Ubiquitin carboxyl-terminal hydrolase 12	C0HB46; B5X1J2
HOST_DN80435_c2_g6_i1	1.2731	8.24439e-15	Macrophage mannose receptor 1	Q61830; Q8C502
HOST_DN79323_c1_g3_i2	1.27254	2.56499e-16	NEDD8	Q9VJ33; Q29QE5
HOST_DN77795_c1_g4_i1	1.27239	0.00769752	Testis-expressed protein 2	Q8IWB9; Q6AHZ5; Q8N3L0; Q9C0C5
HOST_DN81260_c5_g5_i1	1.27195	1.23345e-14	Unconventional myosin-Ic	A5PF48
HOST_DN78469_c2_g4_i1	1.27107	0.000635058	Fasciculation and elongation protein zeta-2	P97578; Q76LN1; Q9JJ35; Q9JJ36
HOST_DN68152_c0_g1_i3	1.27081	7.94198e-06
HOST_DN80183_c1_g1_i1	1.2705	0.000139238	Sialic acid-binding Ig-like lectin 11	Q96RL6
HOST_DN74789_c3_g6_i1	1.27042	1.22166e-23	5'-AMP-activated protein kinase subunit gamma-1	P58108; Q29RZ6
HOST_DN74948_c4_g1_i2	1.26981	8.09115e-21	Solute carrier family 25 member 44	Q8BGF9; Q7TSU9
HOST_DN39441_c0_g1_i1	1.26959	2.60381e-19	Protein unc-50 homolog	Q7ZUU1
HOST_DN78751_c2_g1_i6	1.26797	1.50709e-19	CSC1-like protein 2	Q3TWI9; Q6PCL2; Q6PGA4; Q8C1V5; Q8R0W7
HOST_DN70458_c0_g1_i1	1.26736	1.31136e-18	Zinc finger protein ZPR1	Q62384
HOST_DN78966_c0_g1_i4	1.26723	0.00272569	Calpain-3	Q64691; A2AVV3; Q9WUC5
HOST_DN76923_c1_g1_i2	1.26692	2.72627e-05	Unconventional myosin-XVI	Q8N948
HOST_DN78040_c2_g3_i1	1.26646	1.91399e-08
HOST_DN78211_c3_g2_i1	1.26642	5.21532e-25	Activator of 90 kDa heat shock protein ATPase homolog 1	O95433; B2R9L2; B4DUR9; Q96IL6; Q9P060
HOST_DN75702_c0_g2_i2	1.26611	8.03719e-11	Cytochrome c oxidase assembly factor 7	Q5TYQ3
HOST_DN76303_c1_g4_i1	1.26601	8.17242e-21	Proliferation-associated protein 2G4	P50580
HOST_DN73937_c0_g1_i4	1.26593	4.41219e-36	Importin-11	Q9UI26; A6NGJ5; B4DZ73; D3DW98; Q8N5R2; Q9NSJ6; Q9NVB1
HOST_DN76683_c8_g1_i3	1.26449	1.70299e-12	Procollagen-lysine,2-oxoglutarate 5-dioxygenase 1	P24802
HOST_DN75038_c0_g1_i6	1.26397	2.86018e-23	Rab11 family-interacting protein 4A	Q3LGD4; Q3LGD3
HOST_DN77270_c6_g4_i4	1.26377	1.01896e-23	Peptidyl-prolyl cis-trans isomerase E	Q5TGA3; Q9UIZ5
HOST_DN80779_c0_g2_i1	1.26338	3.94031e-17	Thioredoxin domain-containing protein 9	O14530; B2R9G8; D3DVI4; Q53HG4; Q53RV8; Q6NSF5; Q8TB70; Q9BRU6
HOST_DN73360_c0_g1_i2	1.26248	5.17466e-36	Cytochrome b-c1 complex subunit 2, mitochondrial	Q9DB77; Q8BK11; Q9CVK7
HOST_DN68666_c0_g1_i1	1.26234	1.07893e-06	NADH dehydrogenase [ubiquinone] 1 alpha subcomplex assembly factor 3	Q2HJI2
HOST_DN81159_c4_g3_i2	1.26218	1.18826e-23	ATP-dependent 6-phosphofructokinase, liver type {ECO:0000255|HAMAP-Rule:MF_03184}	P17858; Q96A64; Q96IH4; Q9BR91
HOST_DN76259_c4_g2_i4	1.26121	6.31764e-08	Nuclear protein MDM1	Q5RHU7; A3KNZ6; Q5RHU8
HOST_DN74586_c3_g1_i1	1.26073	4.88819e-06
HOST_DN80802_c3_g2_i1	1.25937	4.27025e-47	Septin-7	Q5R481; Q5R4Y5; Q5R8T4
HOST_DN67908_c0_g1_i1	1.25936	0.000170075	Fc receptor-like protein 5	Q68SN8; E9QLI5; Q80WN2; Q8BJA5
HOST_DN80251_c6_g1_i1	1.25876	1.23083e-21	Serine palmitoyltransferase 2	P97363; P97356
HOST_DN79531_c1_g1_i3	1.25737	1.41174e-18	DCN1-like protein 5	Q1RMX9
HOST_DN77716_c0_g5_i4	1.2565	7.48216e-06	Protein phosphatase Slingshot homolog 1	Q76I79; Q3TDG3; Q69ZM4; Q811E5
HOST_DN69612_c0_g3_i1	1.2559	1.04933e-08
HOST_DN70009_c0_g1_i2	1.25548	1.39888e-12	Low molecular weight phosphotyrosine protein phosphatase	Q5REM7
HOST_DN79323_c1_g1_i4	1.25492	3.35434e-34	Dolichyl-diphosphooligosaccharide--protein glycosyltransferase subunit STT3B	E2RG47
HOST_DN79201_c5_g1_i1	1.25442	6.82087e-14	ATP-dependent 6-phosphofructokinase, liver type {ECO:0000255|HAMAP-Rule:MF_03184}	P30835
HOST_DN70932_c0_g1_i1	1.25396	3.96581e-24
HOST_DN75524_c0_g1_i1	1.25199	0.000854546	Tricarboxylate transport protein, mitochondrial	P79110
HOST_DN75567_c4_g5_i1	1.25168	5.2641e-35	Beta-1,3-galactosyltransferase 2	Q5R5Y3
HOST_DN74275_c1_g1_i3	1.25162	0.00480504	Protein phosphatase 1 regulatory subunit 1C	Q5R853
HOST_DN71853_c0_g1_i1	1.2512	4.46676e-22	Thioredoxin-dependent peroxide reductase, mitochondrial	Q5REY3
HOST_DN77684_c2_g2_i1	1.25001	1.96781e-18	Protein LTV1 homolog	Q5U3J8; Q6DRP7
HOST_DN76569_c4_g2_i4	1.2496	1.08154e-17	Peroxisomal membrane protein 11A	O70597; Q6P749
HOST_DN79137_c6_g3_i1	1.24887	2.80233e-34	ADP-ribosylation factor 6	P62332; P26438; Q5BKA5
HOST_DN80435_c2_g4_i3	1.24879	1.55921e-15	Macrophage mannose receptor 1	Q61830; Q8C502
HOST_DN79103_c4_g1_i1	1.24754	0.00494694	Carboxyl-terminal PDZ ligand of neuronal nitric oxide synthase protein	Q9D3A8; E9Q7B9; Q80TZ6
HOST_DN74916_c8_g1_i1	1.24687	7.86117e-18	Growth arrest and DNA damage-inducible proteins-interacting protein 1	Q5XJW2
HOST_DN77409_c7_g1_i1	1.24654	9.42396e-12	Alpha-protein kinase 1	Q9CXB8; Q69ZH5; Q8BLT9
HOST_DN68357_c0_g1_i2	1.24632	5.31228e-15	Protein phosphatase 1 regulatory subunit 3C-B	Q6P950
HOST_DN73238_c0_g1_i2	1.24627	9.67736e-22	Lambda-crystallin homolog	Q9Y2S2; A0PJ43; B3KN92; Q0VDI1; Q7Z4Z9; Q9P0G7
HOST_DN73380_c0_g2_i2	1.2462	1.53952e-17	Heat shock 70 kDa protein 14	Q5RGE6; A2VD43
HOST_DN68661_c0_g1_i1	1.24586	3.80284e-10	Cornifelin	Q0VBW2
HOST_DN74647_c5_g1_i1	1.24501	4.44472e-22	Retinol dehydrogenase 7	P55006; P50169; Q4KMB6
HOST_DN70820_c0_g1_i5	1.2447	1.58075e-34	Grancalcin	Q8VC88; Q8BL53; Q8K3Z6
HOST_DN78150_c1_g3_i1	1.2442	1.18147e-06
HOST_DN73213_c1_g3_i1	1.24395	5.6931e-07
HOST_DN109897_c0_g1_i1	1.24351	7.58671e-09	Proteasome assembly chaperone 4	Q5JS54; C9J2F8; F8WBZ2; Q5JS53; Q5JS56
HOST_DN81222_c1_g1_i1	1.24262	1.79459e-29	Hamartin	Q92574; B7Z897; Q5VVN5
HOST_DN77440_c4_g1_i3	1.24221	6.45262e-25	Myoferlin	B3DLH6; A2RRS9
HOST_DN70284_c0_g1_i1	1.2421	1.56531e-15	Protein ABHD4 {ECO:0000305}	Q8VD66
HOST_DN73665_c0_g1_i2	1.24199	1.17563e-09	Interferon-induced protein 44-like	Q53G44; Q86TE1; Q96B64; Q99984
HOST_DN80603_c1_g3_i1	1.24196	3.28628e-26	Phosphoglycerate kinase 1	P16617; Q5M945; Q6P508
HOST_DN77239_c5_g2_i2	1.24116	3.93752e-18	NF-kappa-B inhibitor alpha	Q9Z1E3; Q3U9W9; Q3UB40; Q80ZX5
HOST_DN80292_c4_g1_i1	1.24078	3.40976e-43	Coronin-1C	Q9ULV4; A7MAP0; A7MAP1; B3KU12; Q9NSK5
HOST_DN70686_c0_g1_i1	1.24056	2.19019e-20	Ras-related protein Rap-1b	Q9YH37
HOST_DN77850_c1_g2_i1	1.24055	1.05791e-25	Phospholipid hydroperoxide glutathione peroxidase {ECO:0000250|UniProtKB:O70325}	Q32QL6
HOST_DN74366_c5_g1_i1	1.23854	2.54371e-35
HOST_DN68919_c0_g1_i1	1.23756	6.79002e-14	Retinol dehydrogenase 12	Q96NR8; B2RDA2; Q8TAW6
HOST_DN63007_c0_g2_i1	1.23693	0.00129697	Neuronal cell adhesion molecule	P97686
HOST_DN77277_c1_g4_i1	1.23684	0.00273001
HOST_DN81072_c0_g1_i1	1.23621	1.45651e-08	Protein SOGA1	E1U8D0
HOST_DN76816_c0_g1_i1	1.23553	1.98788e-17	Nicalin-1	Q6NZ07; Q6PHK1
HOST_DN75173_c4_g5_i2	1.23542	9.44992e-15	Nucleophosmin	P16039
HOST_DN77223_c2_g7_i1	1.23268	1.41751e-10	G-protein coupled receptor 161	Q90X46; A4IGB3
HOST_DN79362_c2_g1_i3	1.23221	1.25313e-16	Major facilitator superfamily domain-containing protein 8	Q8NHS3; B2RDM1; B7Z205; Q8N2P3
HOST_DN73501_c0_g1_i8	1.23205	1.3344e-36	Interleukin-1 receptor-associated kinase 4	Q8R4K2; Q80WW1
HOST_DN78189_c6_g1_i9	1.2319	6.31236e-19	Ubiquitin carboxyl-terminal hydrolase CYLD	Q9NQC7; O94934; Q7L3N6; Q96EH0; Q9NZX9
HOST_DN80971_c4_g1_i7	1.23186	4.34671e-09	Arachidonate 5-lipoxygenase	P09917; B7ZLS0; E5FPY5; E5FPY7; E5FPY8; Q5JQ14
HOST_DN69347_c0_g1_i1	1.22975	1.03207e-10	Protein ccsmst1	A8WGU8; Q28GZ1
HOST_DN33815_c0_g1_i1	1.22955	0.000249229	High affinity choline transporter 1	Q9GZV3; Q53TF2
HOST_DN78339_c2_g1_i6	1.22905	1.87607e-23	Acetyl-CoA carboxylase	P11029
HOST_DN81181_c2_g2_i3	1.22887	1.20772e-22	Integrin beta-3	P05106; A0PJW2; D3DXJ8; O15495; Q12806; Q13413; Q14648; Q16499
HOST_DN80229_c6_g3_i2	1.22851	5.5009e-15	V-type proton ATPase catalytic subunit A	P31404; Q3MHQ8
HOST_DN76837_c7_g1_i3	1.22795	7.53608e-32	Annexin A4	P97429; Q3UCL0
HOST_DN81265_c3_g3_i1	1.22783	0.000182135	Zinc finger protein 395	Q6DFC8
HOST_DN80571_c1_g3_i1	1.22746	3.99684e-23	Tyrosine-protein phosphatase non-receptor type 12	Q86XU4
HOST_DN56422_c0_g1_i1	1.22739	0.00111608
HOST_DN69212_c0_g1_i2	1.22721	8.59909e-24	Cytochrome c oxidase subunit 5A, mitochondrial	B0VYX4
HOST_DN30125_c0_g1_i1	1.22716	0.00362175	Amine sulfotransferase	O35403
HOST_DN71610_c0_g2_i1	1.22696	0.00121004	Solute carrier family 22 member 13	Q9Y226; B2RCV9; Q8IYG1
HOST_DN77220_c3_g1_i4	1.2268	3.7531e-13	Rho GTPase-activating protein 21	Q5T5U3; Q0VF98; Q7Z3P7; Q8N3A2; Q8NI19; Q8TBV5; Q9P2C3
HOST_DN76855_c4_g2_i1	1.22646	1.70442e-10	G1/S-specific cyclin-D1	Q90459
HOST_DN76197_c3_g1_i5	1.22622	1.19325e-12	DNA damage-inducible transcript 3 protein	P35638; F8VS99
HOST_DN75531_c4_g1_i2	1.22611	4.841e-23	14-3-3 protein zeta/delta	Q5R651
HOST_DN76394_c4_g1_i3	1.22611	9.71959e-33	Prohibitin-2	A9UMS3; Q28HU7
HOST_DN77192_c6_g3_i1	1.22575	1.44912e-13	Angiomotin-like 2a	A1YB07; B3DIZ1; F1QMD1
HOST_DN80590_c2_g1_i1	1.22544	1.98284e-17	Tumor necrosis factor alpha-induced protein 3	P21580; B2R767; E1P588; Q2HIX9; Q5VXQ7; Q9NSR6
HOST_DN78739_c1_g3_i1	1.22503	4.74804e-06
HOST_DN77112_c0_g10_i2	1.22496	2.80109e-18	Testin	Q90YH9
HOST_DN76841_c5_g1_i1	1.22482	4.73806e-27	Cdc42 effector protein 4	Q9JM96; Q3TNF3; Q9QZT8
HOST_DN79236_c1_g1_i7	1.22415	4.45806e-23	RING-box protein 1	Q8QG64
HOST_DN80728_c2_g1_i4	1.22407	1.71294e-05	Histone deacetylase 9-B	Q6PBI4; Q6TEP8
HOST_DN80929_c14_g1_i1	1.22383	2.14487e-26
HOST_DN78194_c0_g1_i1	1.22299	1.24519e-07	Probable methyltransferase TARBP1	Q13395; Q9H581
HOST_DN80696_c3_g3_i2	1.2225	7.15703e-17	Nurim	Q1L911
HOST_DN74678_c3_g5_i1	1.22244	0.000664497	Aldehyde dehydrogenase family 8 member A1	Q66I21
HOST_DN76266_c0_g1_i1	1.22155	4.69761e-11	Syndecan-4	P49416
HOST_DN74279_c2_g3_i1	1.22121	1.68233e-06	Phosphatidylglycerophosphatase and protein-tyrosine phosphatase 1	P0C089
HOST_DN81202_c3_g1_i1	1.22108	8.46599e-30	39S ribosomal protein L10, mitochondrial	Q5BJB7
HOST_DN76778_c2_g2_i5	1.2207	3.38308e-07	Growth arrest-specific protein 7	O60861; A8KAC2; B2RCK9; O43144; Q53Y77; Q7Z571
HOST_DN76105_c5_g1_i2	1.22055	8.29765e-18	FERM domain-containing protein 6	Q96NE9; D3DSB9; Q5HYF2; Q8N2X1; Q8WUH7
HOST_DN70407_c0_g2_i1	1.21971	6.85833e-10
HOST_DN60513_c0_g1_i1	1.21945	6.0813e-07
HOST_DN80690_c0_g3_i2	1.21911	0.000771861	Interleukin-17D	Q8TAD2; B1AM69
HOST_DN83933_c0_g1_i1	1.21872	0.000214654
HOST_DN93383_c0_g1_i1	1.2182	0.000524172
HOST_DN73602_c0_g3_i2	1.21799	2.96136e-09	Protein-cysteine N-palmitoyltransferase HHAT-like protein	Q9D1G3; Q3TZE3; Q8R1K3
HOST_DN75442_c5_g1_i1	1.21706	2.03367e-16	ERBB receptor feedback inhibitor 1	Q99JZ7
HOST_DN78628_c1_g2_i2	1.21696	3.47905e-09	CLOCK-interacting pacemaker	Q9C0C6; B2RCI1; Q8N389; Q8NDZ1
HOST_DN72687_c0_g1_i4	1.21671	3.98771e-14	PDZ and LIM domain protein 5	Q96HC4; A8K6F9; D6RB78; E9PBF5; O60705; Q56VN4; Q5UW38; Q8WVK0
HOST_DN75606_c2_g3_i1	1.21646	7.04625e-48	Lysosomal acid phosphatase	P20611
HOST_DN33160_c0_g1_i1	1.21631	3.16027e-07
HOST_DN75950_c3_g1_i2	1.21609	6.67685e-05	Cytochrome P450 2K1	Q92090; O93304
HOST_DN139435_c0_g1_i1	1.21597	0.00195567	Receptor-interacting serine/threonine-protein kinase 3	Q9Y572; B4DJL9; C4AM87; Q5J795; Q5J796; Q6P5Y1
HOST_DN78291_c31_g1_i4	1.2156	2.26501e-14
HOST_DN78406_c1_g2_i1	1.21496	1.03499e-12	Integrin beta-4	Q9UIQ4
HOST_DN77022_c2_g2_i4	1.21478	1.18387e-09	Ornithine carbamoyltransferase, mitochondrial	P00480; A8K9P2; D3DWB0; Q3KNR1; Q6B0I1; Q9NYJ5
HOST_DN74580_c3_g1_i2	1.21457	3.93365e-10	Dual specificity mitogen-activated protein kinase kinase 1	Q01986; Q5EBD5
HOST_DN70642_c0_g1_i1	1.21456	8.27232e-09	Histidine triad nucleotide-binding protein 3	Q5PNN8; Q0V966; Q1RMA9; Q5RGD5
HOST_DN78200_c3_g2_i1	1.21431	1.52775e-14	Sodium- and chloride-dependent GABA transporter 2	A5PJX7
HOST_DN76855_c4_g1_i1	1.21421	3.52864e-08	G1/S-specific cyclin-D1	Q90459
HOST_DN74692_c3_g4_i2	1.21285	5.96036e-30	Heat shock cognate 71 kDa protein	P63018; P08109; P12225; Q4FZY7; Q62373; Q62374; Q62375
HOST_DN72546_c0_g1_i1	1.21264	8.44347e-11	Uncharacterized aarF domain-containing protein kinase 5	Q80V03; Q8CAA3
HOST_DN70595_c0_g1_i1	1.21194	1.04918e-09	Optic atrophy 3 protein homolog	Q1L9A2
HOST_DN72063_c0_g2_i1	1.2116	8.81404e-12	ATPase family AAA domain-containing protein 3	Q6NVR9
HOST_DN79563_c0_g1_i7	1.21122	7.77186e-16	Guanine nucleotide exchange protein smcr8b	Q6PUR7
HOST_DN79267_c8_g2_i1	1.21039	3.09739e-16
HOST_DN75319_c0_g1_i1	1.20945	0.00837794	Probable E3 ubiquitin-protein ligase HERC6	Q9NWS4
HOST_DN75268_c3_g7_i1	1.20866	3.64543e-17	Serine/threonine-protein phosphatase 2A 55 kDa regulatory subunit B alpha isoform	Q29090
HOST_DN80106_c2_g1_i4	1.20825	3.52623e-22	Tyrosine-protein phosphatase non-receptor type 13	Q8IWH7; Q9NYN9; Q9UDA8
HOST_DN79638_c2_g1_i2	1.20807	2.01842e-12	Liprin-beta-1	Q86W92; O75336; Q86X70; Q9NY03; Q9ULJ0
HOST_DN77495_c1_g3_i1	1.20766	6.84585e-17	Antizyme inhibitor 1	O14977; A6NCD5; Q6IBQ7; Q96D20
HOST_DN70825_c0_g1_i1	1.2075	1.89195e-05	Acetyl-coenzyme A synthetase, cytoplasmic	Q9NR19; A6NE90; Q5QPH2; Q5QPH3; Q8N238; Q96EL0; Q9NQP7; Q9UJ15
HOST_DN76552_c5_g1_i2	1.20732	2.27115e-10	Lysine-specific demethylase 9 {ECO:0000250|UniProtKB:Q80T69}	Q5VWQ0; A8K937; Q6AI21; Q8TC33; Q9HA80; Q9NUP6
HOST_DN75382_c3_g1_i4	1.20718	1.51056e-12	Radixin	P26043; Q3TS85; Q9QW27
HOST_DN78727_c2_g1_i1	1.20711	2.67344e-35	Leptin receptor gene-related protein	O89013; A2AV64; Q3TGT4; Q3TWZ2; Q545G9; Q91Z23
HOST_DN74900_c6_g4_i1	1.2065	5.61264e-15	Cystatin-B {ECO:0000250|UniProtKB:P04080, ECO:0000312|EMBL:AFP50145.1}	J7FQE8
HOST_DN74670_c0_g1_i1	1.20622	3.44011e-07	Lipid droplet-associated hydrolase {ECO:0000250|UniProtKB:Q8BVA5}	Q5F477
HOST_DN75957_c4_g4_i1	1.20605	5.45836e-06	mRNA decay activator protein ZFP36L1 {ECO:0000305}	Q07352; Q13851
HOST_DN64225_c0_g1_i1	1.20574	5.68068e-05
HOST_DN76640_c1_g1_i7	1.20564	2.74921e-10	Large neutral amino acids transporter small subunit 1	Q7YQK4
HOST_DN71440_c0_g1_i2	1.20513	6.69074e-05
HOST_DN74911_c1_g1_i2	1.20419	9.98523e-19	V-type proton ATPase catalytic subunit A	P50516; Q3TKS0; Q3U5W3; Q3U777; Q3UDZ9; Q3US31; Q8CHX2
HOST_DN77237_c0_g3_i2	1.20414	0.00732533	Sulfide:quinone oxidoreductase, mitochondrial {ECO:0000305}	Q9Y6N5; Q9UQM8
HOST_DN72652_c0_g1_i1	1.20342	6.39398e-11	Mitogen-activated protein kinase kinase kinase kinase 3	Q99JP0; E9PWI4; Q9CUS8
HOST_DN78412_c5_g2_i3	1.20326	4.13041e-13	Eukaryotic translation initiation factor 4 gamma 1	Q6NZJ6; Q6NZN8; Q8BW99
HOST_DN80435_c2_g3_i1	1.20272	3.4636e-10	Macrophage mannose receptor 1	P22897; A5PKW3; Q5VSJ2; Q5VSK2
HOST_DN79593_c6_g3_i1	1.2022	1.6242e-27	Very-long-chain 3-oxoacyl-CoA reductase-B {ECO:0000305}	Q6QA33; Q6PBR0
HOST_DN79091_c1_g1_i8	1.20168	1.18212e-23	Branched-chain-amino-acid aminotransferase, cytosolic	Q9GKM4
HOST_DN68615_c0_g1_i1	1.20135	0.00273415	Kelch-like protein 30	Q0D2K2; Q6ZUS1
HOST_DN78987_c3_g1_i1	1.20127	0.000386188	Transcription factor MafK	Q90596
HOST_DN77140_c6_g1_i1	1.20093	2.46048e-19
HOST_DN78072_c2_g2_i1	1.20026	2.66065e-20
HOST_DN82200_c0_g1_i1	1.20018	3.24028e-15	Phosphatidylinositol 4,5-bisphosphate 3-kinase catalytic subunit beta isoform	P42338; D3DNF0; Q24JU2
HOST_DN75809_c1_g1_i1	1.19993	0.00111658
HOST_DN72557_c0_g1_i1	1.19977	6.30061e-17	Superoxide dismutase [Cu-Zn]	O73872
HOST_DN75024_c6_g2_i2	1.19967	1.89259e-21	Exosome complex component RRP40	Q3T0E1
HOST_DN77683_c6_g4_i2	1.19897	1.78347e-09
HOST_DN80035_c2_g1_i5	1.19857	1.00128e-05	Semaphorin-4A	Q62178; D3Z5L2
HOST_DN75518_c1_g3_i3	1.19827	5.27364e-05
HOST_DN73976_c0_g1_i5	1.19823	1.14338e-09	Tubulin delta chain	Q6DIM3
HOST_DN75898_c2_g3_i1	1.19752	8.54588e-33	Cytochrome b-c1 complex subunit 6, mitochondrial	P07919; B2R4V9; D3DQ18; Q5TDF6; Q6LDB8; Q9BQ91
HOST_DN72025_c0_g1_i3	1.19733	6.7985e-29	Cytochrome c oxidase subunit 5A, mitochondrial	B0VYY3
HOST_DN75755_c7_g1_i1	1.1971	1.72433e-24	Potassium channel subfamily K member 1	Q0P5A0
HOST_DN94250_c0_g1_i1	1.19577	5.95717e-10	Probable JmjC domain-containing histone demethylation protein 2C	Q9P2G7
HOST_DN75819_c2_g2_i2	1.19547	3.28722e-41	NADH dehydrogenase [ubiquinone] iron-sulfur protein 8, mitochondrial	Q60HE3
HOST_DN69302_c0_g1_i1	1.19509	4.6975e-16	Mannose-P-dolichol utilization defect 1 protein	O75352; B3KQP1; B4DT74; Q9BUU8
HOST_DN80734_c4_g1_i6	1.19468	3.85352e-08	Sialic acid-binding Ig-like lectin 14	Q08ET2; Q6UXG0
HOST_DN72797_c0_g1_i4	1.19448	2.74282e-15	ETS-related transcription factor Elf-3	P78545; B2R5Q6; Q6IAP8; Q7RU03; Q7Z3X2; Q8NFG2; Q99718
HOST_DN74441_c3_g2_i5	1.19443	0.00116853	HRAS-like suppressor 3 {ECO:0000250|UniProtKB:P53816}	P53817; B7X6T2
HOST_DN76924_c1_g4_i1	1.19427	1.51318e-19	Unconventional myosin-Ib	O43795; O43794; Q7Z6L5
HOST_DN77549_c1_g1_i14	1.19402	0.000798565	Aminoacylase-1	Q99JW2; Q9CR15
HOST_DN78832_c3_g1_i2	1.1939	5.53583e-18	Ral guanine nucleotide dissociation stimulator-like 2	Q5TJE5
HOST_DN75511_c5_g1_i1	1.19332	3.15239e-26	PRELI domain-containing protein 1, mitochondrial	Q32KN9
HOST_DN80047_c2_g1_i3	1.19311	4.50563e-42	Protein diaphanous homolog 1	O60610; A6NF18; B7ZKW2; E9PEZ2; Q17RN4; Q59FH8; Q9UC76
HOST_DN79447_c4_g1_i1	1.1928	0.000416371
HOST_DN75705_c0_g1_i1	1.19196	2.53374e-31
HOST_DN77912_c2_g5_i2	1.19188	8.31927e-38
HOST_DN78012_c7_g4_i2	1.19119	3.71076e-21	Peroxisome proliferator-activated receptor alpha	P37232
HOST_DN76088_c5_g2_i3	1.19059	5.00457e-16	Proline dehydrogenase 1, mitochondrial {ECO:0000250|UniProtKB:O43272}	Q148G5
HOST_DN77461_c3_g1_i1	1.19043	5.79889e-05
HOST_DN79209_c1_g1_i8	1.19033	0.000850742	Potassium/sodium hyperpolarization-activated cyclic nucleotide-gated channel 2	Q9UL51; O60742; O60743; O75267; Q9UBS2
HOST_DN80226_c4_g1_i1	1.18992	2.20237e-05
HOST_DN72505_c0_g1_i1	1.18917	0.000109547
HOST_DN76976_c4_g1_i1	1.18886	0.00584295
HOST_DN68527_c0_g1_i1	1.18843	5.84838e-08	Gamma-glutamylcyclotransferase	Q32LE4
HOST_DN77255_c2_g1_i4	1.18818	8.99245e-06	Tenascin-N {ECO:0000312|MGI:MGI:2665790}	Q80Z71; B9EHR3; Q70HX0
HOST_DN78784_c3_g2_i1	1.18739	3.5288e-14	26S proteasome non-ATPase regulatory subunit 13	P84169
HOST_DN80403_c0_g1_i1	1.18672	0.00477287	C-myc promoter-binding protein	Q7Z401; E7EPL3; Q14655; Q86T77; Q8IVX2; Q8NB93
HOST_DN72448_c0_g1_i3	1.18565	1.31305e-06	Prostaglandin-H2 D-isomerase	O97921
HOST_DN75228_c5_g2_i1	1.1854	0.00858349	Coiled-coil domain-containing protein 92	Q53HC0; B3KNQ0; Q9H697
HOST_DN68126_c0_g1_i1	1.18446	0.000550879
HOST_DN8871_c0_g1_i1	1.18361	0.000309018
HOST_DN76220_c2_g2_i2	1.18272	7.28596e-26	Peptidyl-prolyl cis-trans isomerase F, mitochondrial	Q99KR7
HOST_DN80793_c3_g6_i2	1.18272	4.45209e-16	WD repeat-containing protein 36	Q8NI36; A2RUS4; Q68E02; Q8N1Q2
HOST_DN78616_c2_g1_i1	1.18242	3.73028e-06
HOST_DN80090_c1_g6_i1	1.18116	0.000826387	Mammalian ependymin-related protein 1	A6QLI0
HOST_DN76138_c4_g3_i1	1.18114	1.60939e-15	Prostaglandin D2 receptor 2	Q9Z2J6; Q54A00
HOST_DN74336_c2_g3_i1	1.18078	3.12253e-07	Properdin	P11680; Q3TB98; Q3U779
HOST_DN69118_c0_g1_i1	1.18049	0.00290038
HOST_DN79450_c3_g1_i1	1.17899	1.38874e-23	NADH dehydrogenase [ubiquinone] 1 alpha subcomplex subunit 11	Q9D8B4
HOST_DN74551_c0_g1_i2	1.17871	1.12082e-27	AP-2 complex subunit sigma	P62744; P70626; P97626; Q00380
HOST_DN49909_c0_g1_i1	1.17844	2.34036e-06
HOST_DN78042_c3_g1_i1	1.17778	0.00769856	Deoxyribonuclease-2-beta	Q8WZ79; Q5VXD0; Q5VXD1; Q8WZ80; Q9NQW3
HOST_DN72480_c0_g1_i1	1.17775	1.9099e-11	Manganese-dependent ADP-ribose/CDP-alcohol diphosphatase	Q7T291
HOST_DN76364_c5_g1_i1	1.17751	0.00149297	3-oxo-5-beta-steroid 4-dehydrogenase	Q8VCX1
HOST_DN77037_c1_g10_i1	1.17706	6.13756e-21	Ras-related protein Rab-11B	P22129
HOST_DN77040_c0_g1_i2	1.17687	4.3472e-13	Rho-related GTP-binding protein RhoB	P62747; P01121; Q9CUV7
HOST_DN78269_c1_g1_i1	1.17651	8.76541e-14	Nuclear transport factor 2 {ECO:0000305}	P61972; P13662
HOST_DN68980_c0_g1_i2	1.17629	6.57426e-07	NHP2-like protein 1	Q5XH16
HOST_DN74112_c1_g1_i10	1.1762	2.30528e-05	Tubulin alpha-1D chain	Q2HJ86
HOST_DN80069_c4_g1_i1	1.17503	4.97341e-41	Prefoldin subunit 3	P61759; O55228; Q15765; Q3U6M9; Q9CPZ0
HOST_DN71139_c0_g1_i3	1.17502	6.38981e-24	Ribosome biogenesis protein wdr12 {ECO:0000255|HAMAP-Rule:MF_03029}	Q6NX08; Q803T7
HOST_DN78353_c6_g3_i1	1.17423	1.86673e-14	Mitochondrial intermembrane space import and assembly protein 40	Q2KHZ4
HOST_DN79301_c0_g2_i1	1.17421	2.1323e-22	Mitogen-activated protein kinase kinase kinase 5	Q99683; A6NIA0; B4DGB2; Q5THN3; Q99461
HOST_DN81394_c4_g2_i2	1.17399	7.14423e-05	Guanine nucleotide-binding protein G(I)/G(S)/G(O) subunit gamma-7	O60262; B2R496
HOST_DN73281_c0_g1_i1	1.17336	1.60166e-13	Ribosome production factor 2 homolog	Q2YDN6
HOST_DN74926_c0_g3_i1	1.17301	2.93986e-15	Glycine cleavage system H protein, mitochondrial {ECO:0000303|PubMed:1993703}	P11183
HOST_DN80328_c1_g1_i3	1.17281	4.77798e-15	C-Jun-amino-terminal kinase-interacting protein 3	Q9UPT6; A2A2B3; A7E2B3; Q96RY4; Q9H4I4; Q9H7P1; Q9NUG0
HOST_DN43540_c0_g1_i1	1.1725	0.0054924
HOST_DN80123_c2_g1_i3	1.1723	3.89407e-10	WD repeat and SOCS box-containing protein 2	Q9NYS7; B4DIE6; B4DPV6; Q9NRX9
HOST_DN57385_c0_g1_i1	1.1721	2.74698e-07	CCAAT/enhancer-binding protein delta	Q00322; Q3U937; Q8BW92
HOST_DN63186_c0_g1_i1	1.17199	4.39165e-05	Sterile alpha motif domain-containing protein 9	Q5K651; A2RU68; Q5K649; Q6P080; Q75N21; Q8IVG6; Q9NXS8
HOST_DN76724_c1_g1_i1	1.17168	4.09658e-17	ADP-ribosylation factor 4	Q3SZF2
HOST_DN75473_c2_g2_i3	1.17078	8.12082e-18	Chromodomain-helicase-DNA-binding protein 9	Q3L8U1; B2RTU2; B9ZVQ0; O15025; Q1WF12; Q6DTK9; Q9H9V7; Q9UHM2
HOST_DN72307_c0_g1_i1	1.17025	5.48247e-16	Cytochrome b-c1 complex subunit 8	Q9CQ69
HOST_DN73704_c0_g1_i1	1.17012	2.74577e-05	GMP reductase 1 {ECO:0000255|HAMAP-Rule:MF_03195}	Q9Z244
HOST_DN75891_c0_g2_i2	1.16994	1.57216e-24	Sorting and assembly machinery component 50 homolog B	Q5U3I0
HOST_DN75382_c3_g3_i1	1.16992	2.9449e-25	Radixin	P26043; Q3TS85; Q9QW27
HOST_DN75092_c6_g2_i3	1.16908	1.48405e-10
HOST_DN73168_c2_g1_i1	1.16862	5.49976e-21	Proto-oncogene c-Rel	P16236
HOST_DN73673_c0_g1_i2	1.16852	8.11343e-50	Succinate dehydrogenase [ubiquinone] flavoprotein subunit, mitochondrial	Q7ZVF3; Q1LV99
HOST_DN79443_c2_g13_i1	1.167	0.00181368	Calpain-2 catalytic subunit	O08529; O35518; O54843
HOST_DN70770_c0_g1_i1	1.16682	5.32559e-09	Elongation factor Ts, mitochondrial {ECO:0000255|HAMAP-Rule:MF_03135}	B5X5B4
HOST_DN115553_c0_g1_i1	1.16659	2.58181e-08
HOST_DN79756_c8_g1_i1	1.16637	2.29032e-22	Dynein light chain Tctex-type 3	Q8SPS9
HOST_DN78032_c0_g1_i3	1.16628	6.6283e-08	Probable N-acetyltransferase camello	Q66KL0
HOST_DN142312_c0_g1_i1	1.16533	0.000277292	Pleckstrin homology domain-containing family F member 1	Q68FU1
HOST_DN68304_c0_g1_i1	1.1653	1.73233e-29	Signal recognition particle receptor subunit beta	Q4FZX7
HOST_DN71175_c0_g1_i1	1.16526	3.73759e-07	Ceramide synthase 6	Q8C172; Q3U817; Q8BV12
HOST_DN70655_c0_g1_i1	1.16519	2.58552e-31	Cytochrome b-c1 complex subunit 1, mitochondrial	Q9CZ13; Q3TV75; Q9CWL6
HOST_DN79656_c2_g1_i5	1.16517	1.74761e-14	Transmembrane protein 198-B	Q498W5
HOST_DN80381_c1_g3_i1	1.16467	1.41254e-23	Eukaryotic translation initiation factor 4E	P48597
HOST_DN74778_c4_g2_i1	1.16444	1.27608e-22	Frizzled-1	Q9I9M5
HOST_DN78312_c1_g2_i3	1.16407	0.00143299	Long-chain-fatty-acid--CoA ligase ACSBG1	Q924N5
HOST_DN142732_c0_g1_i1	1.16401	0.00432015
HOST_DN79247_c5_g1_i1	1.16327	8.73289e-25	G protein-coupled receptor kinase 6	O70293; O70294; O70295; Q6DI67
HOST_DN76556_c3_g2_i1	1.1632	5.329e-08
HOST_DN74140_c0_g1_i3	1.16285	3.91106e-18	Sn1-specific diacylglycerol lipase alpha	Q9Y4D2; A7E233; Q6WQJ0
HOST_DN76122_c3_g1_i2	1.16268	2.41058e-33	Septin-7	Q9WVC0
HOST_DN70038_c0_g1_i1	1.16264	1.07111e-23	Transmembrane protein 256	Q568J8
HOST_DN76373_c1_g1_i1	1.1617	8.61977e-24	Serine/threonine-protein kinase pim-1	P26794
HOST_DN74195_c0_g4_i2	1.16043	0.00304212	RNA polymerase II subunit A C-terminal domain phosphatase SSU72	Q6PC19
HOST_DN75342_c6_g4_i1	1.16012	6.50288e-20	Dehydrogenase/reductase SDR family member 11	Q71R50
HOST_DN77425_c0_g2_i2	1.159	0.00197058
HOST_DN76363_c3_g1_i2	1.15855	1.29214e-17	Mannose-6-phosphate isomerase	Q3SZI0
HOST_DN80591_c5_g1_i1	1.15785	2.05204e-20
HOST_DN79713_c6_g1_i7	1.15746	2.45866e-14	Serologically defined colon cancer antigen 3 homolog	A2CE83
HOST_DN79500_c3_g2_i2	1.15696	5.32923e-35	MAP kinase-activated protein kinase 5	Q8IW41; B3KVA5; O60491; Q86X46; Q9BVX9; Q9UG86
HOST_DN78005_c1_g2_i3	1.15693	4.15238e-12	Enhancer of filamentation 1	Q14511; A8K9G7; A8MSJ9; G5E9Y9; Q5T9R4; Q5XKI0
HOST_DN78534_c2_g1_i1	1.15688	1.68696e-09	Tumor necrosis factor receptor superfamily member 19L	Q9N092
HOST_DN77360_c3_g2_i1	1.15547	0.00174419
HOST_DN78996_c0_g1_i2	1.15478	3.33122e-19	Ubiquitin carboxyl-terminal hydrolase 32	Q8NFA0; Q7Z5T3; Q9BX85; Q9Y591
HOST_DN62528_c0_g1_i1	1.15461	0.00992849
HOST_DN79578_c3_g1_i1	1.15445	3.02966e-07	Uncharacterized protein KIAA1143 homolog	Q5XHI2
HOST_DN68890_c0_g1_i1	1.15315	0.000836342	N-acetylmuramoyl-L-alanine amidase	Q8VCS0; Q8K4I8; Q9QXZ1; Q9QXZ2
HOST_DN75438_c3_g1_i6	1.15309	1.04543e-19	CD166 antigen homolog A	Q90460; Q90480
HOST_DN78712_c0_g3_i1	1.15301	7.96535e-11	Protein FAM118B	Q9BPY3; Q9H7B0
HOST_DN80672_c3_g1_i2	1.15211	2.47431e-15	Syndecan-2	P43407
HOST_DN79709_c4_g1_i6	1.15198	1.10988e-24	Filamin-A	P21333; E9KL45; Q5HY53; Q5HY55; Q8NF52
HOST_DN70983_c0_g1_i2	1.15187	1.41665e-27	Cytochrome b-c1 complex subunit 2, mitochondrial	P23004; Q3ZCG7; Q5E9C7
HOST_DN80798_c9_g1_i2	1.15185	2.99954e-27	Probable 2-oxoglutarate dehydrogenase E1 component DHKTD1, mitochondrial	Q5PRA2
HOST_DN77801_c1_g3_i1	1.15154	1.95096e-26
HOST_DN78349_c1_g1_i11	1.15115	2.71328e-24	C-Maf-inducing protein	A1L3F5; Q08AX7
HOST_DN69057_c0_g1_i2	1.15089	3.45711e-06
HOST_DN54997_c0_g1_i1	1.15081	0.00108936	Tenascin-N {ECO:0000312|HGNC:HGNC:22942}	Q9UQP3; A0A0A6YY94; B9EGP3; Q5R360
HOST_DN72780_c1_g1_i3	1.1504	1.81281e-23	Lipase member H	Q6DBU8
HOST_DN80829_c2_g1_i8	1.15003	4.41136e-11
HOST_DN80996_c5_g1_i4	1.14999	0.000774115
HOST_DN79641_c3_g2_i1	1.14996	6.88691e-16	Small G protein signaling modulator 3	Q7T2D0
HOST_DN76321_c2_g1_i1	1.1493	2.46923e-28	Protein LSM12 homolog A	Q6PBA2
HOST_DN75587_c2_g1_i2	1.1485	1.46831e-12	PRA1 family protein 3	Q8R5J9; Q8C2Q1; Q9D838; Q9DB37; Q9WUG9
HOST_DN75224_c2_g2_i12	1.14793	0.00214619	Gamma-aminobutyric acid receptor subunit rho-2	Q0II76
HOST_DN75721_c4_g1_i2	1.14785	1.06104e-05	Collagen alpha-1(XV) chain	P39059; Q5T6J4; Q9UDC5; Q9Y4W4
HOST_DN78376_c4_g1_i6	1.14718	8.79812e-07	BRCA1-associated RING domain protein 1	Q99728; F6MDH7; F6MDH8; F6MDH9; O43574; Q53SS5
HOST_DN76849_c3_g2_i1	1.14714	5.79878e-11	Endoribonuclease ZC3H12A {ECO:0000305}	Q5D1E7; Q3U8J3; Q3UE76; Q8JZW9; Q922T4
HOST_DN78984_c1_g1_i2	1.14653	2.92619e-20	Ubiquitin-conjugating enzyme E2 D2	P62840; P51669; Q5XGS3
HOST_DN80000_c6_g3_i1	1.14626	1.02582e-28
HOST_DN71945_c0_g1_i4	1.14603	8.91951e-21	Cyclin-dependent kinase 4	Q91727
HOST_DN78096_c2_g2_i1	1.14591	9.87054e-10	E3 ubiquitin-protein ligase RNF126 {ECO:0000305}	Q91YL2
HOST_DN72224_c0_g1_i2	1.14558	4.91559e-09	U3 small nucleolar RNA-associated protein 15 homolog	Q7ZW33; Q6TGY5
HOST_DN70488_c0_g2_i2	1.14544	2.98394e-19	Solute carrier family 25 member 43	Q5U3V7
HOST_DN74489_c3_g1_i2	1.1453	7.81684e-10	Transcription factor AP-1	P54864
HOST_DN78371_c0_g3_i1	1.1449	1.8566e-11	Peroxisome proliferator-activated receptor alpha	Q95N78
HOST_DN77463_c2_g4_i1	1.14454	2.91379e-17	Stress-70 protein, mitochondrial	Q5R511
HOST_DN79524_c0_g1_i2	1.14435	6.71062e-07
HOST_DN73877_c5_g1_i1	1.1441	5.56124e-06	Heat shock 70 kDa protein 1	Q9I8F9
HOST_DN79486_c5_g1_i1	1.1439	4.14775e-15	Tyrosine-protein phosphatase non-receptor type 1	O13016; Q90704
HOST_DN75844_c4_g6_i4	1.14341	5.21466e-41	Peflin {ECO:0000250|UniProtKB:Q9UBV8}	Q6DC93
HOST_DN78315_c7_g1_i1	1.14326	6.6108e-10	M-phase phosphoprotein 6	Q9D1Q1
HOST_DN74852_c7_g1_i1	1.14282	4.80853e-40	Interleukin-6 receptor subunit beta	P40189; A0N0L4; Q5FC04; Q9UQ41
HOST_DN78604_c4_g2_i1	1.14235	7.73092e-25	Cytochrome c-type heme lyase	Q5F339
HOST_DN79533_c2_g1_i2	1.14235	1.9788e-05	mRNA decay activator protein ZFP36L1 {ECO:0000305}	P23950
HOST_DN74226_c0_g1_i3	1.14099	0.00324463	Neuromedin-K receptor	P47937; Q61968; Q8BL44; Q9JKN0
HOST_DN71806_c0_g1_i2	1.14083	3.69504e-12	Probable RNA-binding protein EIF1AD	Q0V9J5
HOST_DN75702_c1_g1_i3	1.14077	2.59139e-15	Adipocyte plasma membrane-associated protein	B5X3B2
HOST_DN70114_c0_g1_i2	1.14064	3.05493e-11	SAM domain-containing protein SAMSN-1	Q9NSI8; B3KWJ3; F8WAA1; Q8NFF7; Q9C041
HOST_DN76763_c3_g4_i1	1.13863	2.10144e-20	SPRY domain-containing SOCS box protein 3	Q571F5; Q3U0T8; Q6GQX9; Q8C6A9; Q8R4S9; Q9D7E0
HOST_DN77707_c1_g1_i2	1.13849	0.00849018
HOST_DN78030_c1_g5_i1	1.13788	6.91516e-35	ATP-binding cassette sub-family B member 7, mitochondrial	Q704E8
HOST_DN75267_c3_g4_i1	1.13696	9.10071e-05	High affinity nerve growth factor receptor	Q91009
HOST_DN72647_c0_g1_i2	1.13687	1.16063e-15	28S ribosomal protein S12, mitochondrial	O35680
HOST_DN74660_c0_g1_i4	1.13599	5.7117e-28	Eukaryotic translation initiation factor 2-alpha kinase 1	Q4R8E0
HOST_DN75944_c3_g1_i1	1.1359	6.48591e-12	La-related protein 4	Q71RC2; A8K6T1; E9PDG5; G3XAA8; G5E976; Q5CZ97; Q6ZV14; Q96NF9
HOST_DN77505_c1_g2_i1	1.1349	8.03936e-17	ATP-binding cassette sub-family E member 1	P61222; O88793; Q13181; Q13864; Q96AL0; Q96B10; Q99K66
HOST_DN75268_c3_g3_i2	1.13465	7.16222e-11	BCL2/adenovirus E1B 19 kDa protein-interacting protein 3	O55003; Q544Y4
HOST_DN76477_c6_g4_i3	1.1345	8.00545e-44	Probable Bax inhibitor 1	Q9IA79
HOST_DN160678_c0_g1_i1	1.13378	0.00102047	Pleckstrin homology domain-containing family G member 5	Q6RFZ7
HOST_DN78409_c3_g1_i1	1.13364	0.000227647	Protein eva-1 homolog C	P58659; A2RSZ2; Q497W3; Q9D4L3
HOST_DN76327_c4_g2_i1	1.13336	7.43982e-05	Isthmin-2	Q58T08; Q1JQ38
HOST_DN72705_c1_g1_i1	1.13288	1.39657e-05	Putative threonylcarbamoyl-AMP synthase	P45831
HOST_DN72792_c0_g1_i2	1.13256	0.000110992	Xylose isomerase	Q9FKK7; Q8L759
HOST_DN78208_c0_g1_i1	1.1325	2.91749e-05
HOST_DN74268_c4_g5_i1	1.1323	8.59588e-09
HOST_DN76714_c2_g3_i3	1.13165	1.4369e-20	Acetyl-CoA carboxylase 1	Q705X9; Q91VC8; Q925C4; Q925C5
HOST_DN76247_c4_g3_i4	1.13128	3.4455e-23	Synaptophysin-like protein 1	Q16563; A4D0R2; Q96AR8
HOST_DN78597_c3_g2_i3	1.13094	2.80798e-12	26S proteasome regulatory subunit 6B	Q4R7L3
HOST_DN21960_c0_g1_i1	1.13078	2.54826e-06
HOST_DN73118_c4_g4_i1	1.13032	2.34136e-09	Pyrroline-5-carboxylate reductase 2	Q17QJ7
HOST_DN78232_c1_g1_i1	1.13001	0.00693428	NACHT, LRR and PYD domains-containing protein 3	Q8R4B8; Q1JQ87; Q1JQ88; Q6JEL0; T1W2H6
HOST_DN73635_c0_g1_i1	1.12994	2.83174e-05	WD repeat-containing protein 3	Q9UNX4
HOST_DN76501_c4_g1_i4	1.12986	9.43252e-10	Phosphatidate phosphatase LPIN1	E7ESE7; F5GY24; Q53T25
HOST_DN69871_c0_g1_i2	1.12954	9.3445e-10	Thioredoxin-like protein 4A	P83877; O14834; Q3TLI3
HOST_DN76651_c3_g1_i2	1.1284	8.08623e-22	Alkyldihydroxyacetonephosphate synthase, peroxisomal	P97275
HOST_DN75950_c3_g2_i1	1.12797	5.03741e-05	Cytochrome P450 2K1	Q92090; O93304
HOST_DN76392_c2_g1_i1	1.12765	4.49131e-11	39S ribosomal protein L21, mitochondrial	Q2TBS2
HOST_DN72508_c1_g1_i1	1.12747	9.78061e-18	28S ribosomal protein S16, mitochondrial	Q9Y3D3; B4E032; Q96Q60
HOST_DN79570_c3_g1_i7	1.12745	0.000157513	Aryl hydrocarbon receptor	O02747
HOST_DN79334_c2_g1_i1	1.12711	4.68594e-14	Glutathione synthetase	P48637; B2R697; B6F210; E1P5P9; Q4TTD9
HOST_DN73409_c0_g1_i2	1.12682	3.35616e-29	Ubiquitin-conjugating enzyme E2 G1	P62255; Q99462
HOST_DN72610_c0_g1_i2	1.12589	2.80585e-25	LIM domain and actin-binding protein 1	Q9NXC3; Q9NXU6; Q9P0H8; Q9UHB5
HOST_DN77287_c3_g1_i6	1.12559	0.00230725
HOST_DN79721_c1_g1_i1	1.12548	6.84512e-16	Ubiquitin-like protein 4A	C3KHF2
HOST_DN73616_c0_g1_i1	1.12538	1.14726e-11	BICD family-like cargo adapter 2	A0JMK8
HOST_DN79105_c2_g3_i1	1.12519	1.86078e-05
HOST_DN77988_c1_g4_i2	1.1246	0.00123925
HOST_DN70785_c0_g1_i3	1.12437	2.09346e-15	Lon protease homolog, mitochondrial {ECO:0000255|HAMAP-Rule:MF_03120}	P36776; B3KPH8; D6W635; E5KMH8; F5GZ27; P36777; Q8N8K8; Q9UQ95
HOST_DN78342_c0_g2_i1	1.12437	2.55532e-15	Caskin-1	Q6P9K8; Q6ZPU2; Q8BWU2; Q8BX99; Q9CXH0
HOST_DN67744_c0_g1_i1	1.12297	4.08445e-10	NTF2-related export protein 2	Q9NRL7; Q9Y3M4; Q9Y3M5
HOST_DN78929_c2_g3_i2	1.12296	3.21516e-33	FAS-associated factor 2	Q96CS3; O94963; Q8IUF2; Q9BRP2; Q9BVM7
HOST_DN79133_c5_g2_i1	1.12281	1.08765e-23	MOB kinase activator 1A	Q3T1J9
HOST_DN70970_c0_g2_i2	1.12267	0.00258785	Anterior gradient protein 2 homolog	Q5RZ65; A7MCE1
HOST_DN76278_c2_g5_i1	1.12237	0.00023732
HOST_DN81048_c4_g1_i1	1.12169	6.88839e-12
HOST_DN75435_c2_g4_i2	1.12164	6.85511e-11	Serine/threonine-protein kinase tousled-like 2 {ECO:0000250|UniProtKB:Q86UE8}	Q1ECX4; A8WGJ6; Q90ZY7
HOST_DN79474_c3_g6_i3	1.12144	2.38321e-05	Ryanodine receptor 1	Q7TNG1; Q80UQ5; Q80X16; Q99JF9
HOST_DN74467_c2_g2_i2	1.12144	0.000158434	Integral membrane protein 2C	Q5NVC3
HOST_DN78531_c3_g1_i2	1.121	3.36518e-22	Syntenin-1	O00560; B2R5Q7; B4DUH3; B7ZLN2; O00173; O43391; Q14CP2
HOST_DN76994_c8_g4_i1	1.12064	3.51711e-31	Transportin-2	Q99LG2; Q8C0U9
HOST_DN78616_c3_g3_i3	1.11997	0.000372651	Adenosine deaminase	Q6DG22
HOST_DN79508_c0_g1_i2	1.11972	3.13013e-29	Ferrochelatase, mitochondrial	O57478
[truncated: 4,021 more rows]

## Sheet: DEGs_platax_ctlvsRes_96h
Differentially expressed genes in control vs Resistant fish at 96hpi
Log2FC > 0 indicates up-regulation in control-96h
Name	log2FoldChange	FDR	Full_name	UniprotIDs
HOST_DN77113_c2_g8_i1	-2.23507	0.00083213
HOST_DN76349_c0_g1_i17	-1.91993	0.00147921
HOST_DN80334_c3_g1_i4	-1.90026	1.66336e-05	Carboxypeptidase A1	P00731
HOST_DN38859_c0_g2_i1	-1.76338	7.79584e-05	Hormonally up-regulated neu tumor-associated kinase	O88866
HOST_DN67020_c0_g1_i1	-1.75678	3.80734e-06	P2Y purinoceptor 12	Q9H244; D3DNJ5; Q546J7
HOST_DN63531_c0_g1_i1	-1.58631	0.00464518	Gap junction Cx32.2 protein	P51915
HOST_DN80303_c1_g1_i1	-1.54202	0.00461526	T cell receptor beta variable 7-2 {ECO:0000303|Ref.2}	A0A1B0GXF2
HOST_DN77250_c0_g1_i2	-1.49362	0.000306311	Protein HP-25 homolog 2	Q2KIU3
HOST_DN69057_c0_g1_i2	-1.39933	7.51004e-05
HOST_DN79483_c1_g3_i1	-1.27903	0.00636337
HOST_DN74049_c5_g1_i2	-1.24771	0.00147921
HOST_DN69564_c0_g1_i1	-1.2275	0.00147921	Serine protease 57	Q6IE59
HOST_DN71759_c0_g1_i3	-1.19395	0.000101193	Low choriolytic enzyme	P31579; O13115
HOST_DN54818_c0_g1_i2	-1.18714	0.00110008	Cadherin-like protein 26	P59862
HOST_DN66973_c0_g1_i3	-1.17813	3.69695e-07	C-C motif chemokine 20	O89093; Q9Z1X3
HOST_DN70953_c0_g1_i1	-1.16024	0.00457883	Arf-GAP with dual PH domain-containing protein 1	O75689; A4D2Q2; B3KRZ4; B4DVA6; F6XZ68; H7C2Q4
HOST_DN79144_c0_g1_i1	-1.1595	0.00257611	Coagulation factor VIII	P12263; Q95243
HOST_DN74598_c1_g6_i1	-1.15834	0.009662	C-type lectin domain family 4 member M	Q8HY10
HOST_DN80496_c2_g2_i1	-1.1047	0.000286696	Cadherin-like protein 26	Q8IXH8; A2A2M5; B3KNX3; Q6P5Y6; Q8TCH3; Q9BQN4; Q9NRU1
HOST_DN75673_c1_g1_i2	-1.10248	0.00474083	UPF0577 protein KIAA1324-like homolog	Q3UZV7; Q8BJM9; Q8BJN9; Q8BJT7; Q8BKX9; Q8BL89; Q8BLT1; Q8BM91
HOST_DN78434_c3_g1_i6	-1.02824	0.0097858
HOST_DN76649_c1_g3_i2	-1.01084	0.00536733	Low affinity immunoglobulin gamma Fc receptor IB	Q92637; Q7KZ13; Q92638
HOST_DN75881_c5_g3_i1	1.01275	0.00252288	BTB/POZ domain-containing protein kctd15	Q6DC02
HOST_DN76427_c2_g2_i2	1.06531	0.00292131	Palladin	Q9ET54; A0JNZ3; Q69ZT7; Q6DFX7; Q9CWW1
HOST_DN71680_c0_g1_i1	1.09571	0.00840359	Fructose-1,6-bisphosphatase isozyme 2	Q9Z1N1
HOST_DN78299_c0_g1_i2	1.14086	0.00996304	T-lymphoma invasion and metastasis-inducing protein 2	Q8IVF5; B2RP56; C9JZV2; Q6NXN9; Q6ZUP9; Q9UFG6; Q9UKV9; Q9UKW0
HOST_DN71598_c0_g1_i1	1.31249	0.00626703	Sal-like protein 1	Q9NSC2; Q99881; Q9NSC3; Q9P1R0
HOST_DN56861_c0_g1_i1	1.39192	0.00626703
HOST_DN75481_c0_g3_i2	1.43116	0.00978616	Early growth response protein 1	P26632
HOST_DN22190_c0_g1_i1	1.44053	0.00083213
HOST_DN76650_c0_g1_i7	1.47661	0.00258848	Fibronectin	Q8IVI8; Q96KP7; Q96KP8; Q96KP9; Q9H1B8; Q9HAP3; Q9UMK2
HOST_DN76634_c0_g1_i3	1.51053	0.00257611	Ankyrin repeat and fibronectin type-III domain-containing protein 1	Q8N957
HOST_DN79168_c3_g6_i2	1.78001	0.00996304	3-hydroxy-3-methylglutaryl-coenzyme A reductase	P04035; B7Z3Y9; Q8N190
HOST_DN75975_c2_g1_i1	2.05687	0.00695615	Krueppel-like factor 4	Q60793; P70421; Q3U2D6; Q3URS6; Q78K30; Q9R255
HOST_DN71562_c0_g1_i2	2.19603	0.00166083	Plasminogen activator inhibitor 1	P13909; Q3ZBB9
HOST_DN116743_c0_g1_i1	2.3059	0.00617216
HOST_DN71808_c0_g1_i1	2.38432	0.00237327	Kinesin-like protein KIF27	Q86VH2; B2RTR8; Q5T6W0; Q86VH0; Q86VH1; Q9UF54
HOST_DN69892_c0_g1_i4	2.97295	7.12208e-05	Endothelin receptor type B {ECO:0000305}	Q90328

## Sheet: Go_platax_ctlvsInf_upInf_24h
Gene Ontology enrichment for DEGs up-regulated in infected fish at 24hpi vs control 24hpi
GO_term	GO_name	Ratio	P	n_study	Bonferroni adj. P
GO:0005575	cellular_component	1860/2388	4.18e-59	1860	8.59e-55
GO:0044444	cytoplasmic part	1076/2388	1.04e-57	1076	2.14e-53
GO:0044464	cell part	1690/2388	2.8e-46	1690	5.75e-42
GO:0003674	molecular_function	1664/2388	1.08e-43	1664	2.22e-39
GO:0044424	intracellular part	1492/2388	1.42e-43	1492	2.92e-39
GO:0008150	biological_process	1691/2388	1.78e-43	1691	3.66e-39
GO:0044281	small molecule metabolic process	280/2388	7.44e-40	280	1.53e-35
GO:0003824	catalytic activity	801/2388	3.25e-36	801	6.68e-32
GO:0008152	metabolic process	846/2388	3.56e-35	846	7.31e-31
GO:0044283	small molecule biosynthetic process	132/2388	2.73e-34	132	5.6e-30
GO:0009058	biosynthetic process	315/2388	1.77e-31	315	3.63e-27
GO:0044429	mitochondrial part	170/2388	2.04e-31	170	4.2e-27
GO:0016491	oxidoreductase activity	156/2388	7.87e-31	156	1.62e-26
GO:1901576	organic substance biosynthetic process	304/2388	6.1e-30	304	1.25e-25
GO:0006629	lipid metabolic process	189/2388	4.95e-29	189	1.02e-24
GO:0008610	lipid biosynthetic process	108/2388	2.52e-28	108	5.17e-24
GO:0071704	organic substance metabolic process	784/2388	3.11e-28	784	6.39e-24
GO:0016020	membrane	828/2388	3.19e-27	828	6.55e-23
GO:0009987	cellular process	1374/2388	7.16e-27	1374	1.47e-22
GO:0044249	cellular biosynthetic process	284/2388	3e-26	284	6.16e-22
GO:0051186	cofactor metabolic process	100/2388	2.6e-25	100	5.34e-21
GO:0019752	carboxylic acid metabolic process	147/2388	3.12e-24	147	6.41e-20
GO:0044237	cellular metabolic process	741/2388	7.71e-24	741	1.58e-19
GO:0044238	primary metabolic process	731/2388	1.27e-23	731	2.62e-19
GO:0043436	oxoacid metabolic process	154/2388	1.43e-23	154	2.94e-19
GO:0006082	organic acid metabolic process	156/2388	1.44e-23	156	2.96e-19
GO:0046394	carboxylic acid biosynthetic process	81/2388	1.58e-23	81	3.25e-19
GO:0016053	organic acid biosynthetic process	81/2388	2.25e-23	81	4.62e-19
GO:1901564	organonitrogen compound metabolic process	516/2388	5.87e-23	516	1.21e-18
GO:0036094	small molecule binding	425/2388	4.61e-22	425	9.47e-18
GO:0072330	monocarboxylic acid biosynthetic process	61/2388	1.63e-21	61	3.36e-17
GO:1901566	organonitrogen compound biosynthetic process	147/2388	7.43e-21	147	1.53e-16
GO:0044425	membrane part	783/2388	1.17e-20	783	2.4e-16
GO:0005739	mitochondrion	167/2388	6.94e-20	167	1.43e-15
GO:0043168	anion binding	449/2388	7.46e-20	449	1.53e-15
GO:0051188	cofactor biosynthetic process	63/2388	1.02e-19	63	2.09e-15
GO:0031966	mitochondrial membrane	101/2388	1.89e-19	101	3.88e-15
GO:0032787	monocarboxylic acid metabolic process	89/2388	1.08e-18	89	2.21e-14
GO:0006732	coenzyme metabolic process	72/2388	1.19e-18	72	2.45e-14
GO:0019637	organophosphate metabolic process	138/2388	2.06e-18	138	4.23e-14
GO:0019866	organelle inner membrane	75/2388	3.34e-18	75	6.86e-14
GO:0044255	cellular lipid metabolic process	133/2388	4.33e-18	133	8.89e-14
GO:0005488	binding	1301/2388	5.84e-18	1301	1.2e-13
GO:0006793	phosphorus metabolic process	249/2388	1.4e-17	249	2.87e-13
GO:0048037	cofactor binding	99/2388	1.4e-17	99	2.87e-13
GO:0005743	mitochondrial inner membrane	68/2388	4.14e-17	68	8.5e-13
GO:1901615	organic hydroxy compound metabolic process	85/2388	4.99e-17	85	1.02e-12
GO:0006091	generation of precursor metabolites and energy	59/2388	1.26e-16	59	2.58e-12
GO:1901265	nucleoside phosphate binding	361/2388	1.35e-16	361	2.77e-12
GO:0000166	nucleotide binding	361/2388	1.35e-16	361	2.77e-12
GO:0002252	immune effector process	96/2388	1.99e-16	96	4.08e-12
GO:0016125	sterol metabolic process	45/2388	2.86e-16	45	5.88e-12
GO:0031090	organelle membrane	317/2388	7.36e-16	317	1.51e-11
GO:0072524	pyridine-containing compound metabolic process	42/2388	7.77e-16	42	1.6e-11
GO:0006066	alcohol metabolic process	65/2388	8.7e-16	65	1.79e-11
GO:0005829	cytosol	432/2388	1.01e-15	432	2.08e-11
GO:0019362	pyridine nucleotide metabolic process	41/2388	1.07e-15	41	2.19e-11
GO:0046496	nicotinamide nucleotide metabolic process	41/2388	1.07e-15	41	2.19e-11
GO:0006733	oxidoreduction coenzyme metabolic process	43/2388	1.7e-15	43	3.49e-11
GO:0006952	defense response	124/2388	1.82e-15	124	3.73e-11
GO:0044446	intracellular organelle part	835/2388	2.61e-15	835	5.35e-11
GO:0005737	cytoplasm	566/2388	3.43e-15	566	7.04e-11
GO:0008202	steroid metabolic process	56/2388	4.29e-15	56	8.8e-11
GO:0016126	sterol biosynthetic process	21/2388	8.39e-15	21	1.72e-10
GO:0006796	phosphate-containing compound metabolic process	230/2388	1.25e-14	230	2.56e-10
GO:0002376	immune system process	195/2388	1.5e-14	195	3.08e-10
GO:0009108	coenzyme biosynthetic process	49/2388	1.65e-14	49	3.4e-10
GO:1901575	organic substance catabolic process	196/2388	1.78e-14	196	3.65e-10
GO:0008203	cholesterol metabolic process	40/2388	2.2e-14	40	4.51e-10
GO:0009056	catabolic process	216/2388	2.65e-14	216	5.45e-10
GO:1902652	secondary alcohol metabolic process	40/2388	2.72e-14	40	5.58e-10
GO:0097367	carbohydrate derivative binding	357/2388	3.54e-14	357	7.27e-10
GO:0017144	drug metabolic process	89/2388	4.32e-14	89	8.87e-10
GO:0043226	organelle	1010/2388	7.18e-14	1010	1.48e-09
GO:0005789	endoplasmic reticulum membrane	136/2388	9.99e-14	136	2.05e-09
GO:0055086	nucleobase-containing small molecule metabolic process	91/2388	1.02e-13	91	2.1e-09
GO:0065007	biological regulation	1059/2388	1.23e-13	1059	2.53e-09
GO:0043167	ion binding	773/2388	2.61e-13	773	5.35e-09
GO:0043229	intracellular organelle	943/2388	3.32e-13	943	6.82e-09
GO:0048029	monosaccharide binding	31/2388	3.65e-13	31	7.5e-09
GO:0043227	membrane-bounded organelle	872/2388	4.78e-13	872	9.81e-09
GO:0055114	oxidation-reduction process	69/2388	5.3e-13	69	1.09e-08
GO:0006633	fatty acid biosynthetic process	33/2388	5.56e-13	33	1.14e-08
GO:0010033	response to organic substance	248/2388	1.04e-12	248	2.13e-08
GO:0090407	organophosphate biosynthetic process	81/2388	1.06e-12	81	2.17e-08
GO:0006807	nitrogen compound metabolic process	620/2388	1.07e-12	620	2.19e-08
GO:0044422	organelle part	857/2388	2.1e-12	857	4.32e-08
GO:0016052	carbohydrate catabolic process	33/2388	2.72e-12	33	5.6e-08
GO:0044421	extracellular region part	259/2388	3.63e-12	259	7.45e-08
GO:1902653	secondary alcohol biosynthetic process	17/2388	3.8e-12	17	7.81e-08
GO:0006695	cholesterol biosynthetic process	17/2388	3.8e-12	17	7.81e-08
GO:0050896	response to stimulus	489/2388	4.22e-12	489	8.66e-08
GO:0006694	steroid biosynthetic process	31/2388	4.24e-12	31	8.72e-08
GO:0031224	intrinsic component of membrane	572/2388	4.37e-12	572	8.98e-08
GO:0002684	positive regulation of immune system process	113/2388	5.86e-12	113	1.2e-07
GO:0016709	oxidoreductase activity, acting on paired donors, with incorporation or reduction of molecular oxygen, NAD(P)H as one donor, and incorporation of one atom of oxygen	17/2388	6.64e-12	17	1.36e-07
GO:0005975	carbohydrate metabolic process	78/2388	6.66e-12	78	1.37e-07
GO:0006950	response to stress	286/2388	9.71e-12	286	2e-07
GO:0050662	coenzyme binding	59/2388	9.75e-12	59	2e-07
GO:0044248	cellular catabolic process	182/2388	1.36e-11	182	2.79e-07
GO:0006753	nucleoside phosphate metabolic process	78/2388	1.4e-11	78	2.87e-07
GO:1901362	organic cyclic compound biosynthetic process	147/2388	1.41e-11	147	2.89e-07
GO:0016705	oxidoreductase activity, acting on paired donors, with incorporation or reduction of molecular oxygen	40/2388	1.48e-11	40	3.04e-07
GO:0009117	nucleotide metabolic process	77/2388	1.99e-11	77	4.08e-07
GO:0043603	cellular amide metabolic process	73/2388	2.14e-11	73	4.4e-07
GO:0072525	pyridine-containing compound biosynthetic process	29/2388	2.56e-11	29	5.25e-07
GO:0016021	integral component of membrane	553/2388	2.58e-11	553	5.3e-07
GO:1901617	organic hydroxy compound biosynthetic process	39/2388	2.67e-11	39	5.49e-07
GO:0002366	leukocyte activation involved in immune response	51/2388	3.82e-11	51	7.86e-07
GO:0016746	transferase activity, transferring acyl groups	53/2388	4.04e-11	53	8.3e-07
GO:0034404	nucleobase-containing small molecule biosynthetic process	39/2388	4.31e-11	39	8.86e-07
GO:0019363	pyridine nucleotide biosynthetic process	28/2388	4.45e-11	28	9.14e-07
GO:0019359	nicotinamide nucleotide biosynthetic process	28/2388	4.45e-11	28	9.14e-07
GO:0006954	inflammatory response	61/2388	4.63e-11	61	9.52e-07
GO:0042221	response to chemical	294/2388	6.17e-11	294	1.27e-06
GO:0044432	endoplasmic reticulum part	161/2388	6.55e-11	161	1.35e-06
GO:0002263	cell activation involved in immune response	51/2388	6.95e-11	51	1.43e-06
GO:0006631	fatty acid metabolic process	52/2388	7.09e-11	52	1.46e-06
GO:0005886	plasma membrane	439/2388	7.48e-11	439	1.54e-06
GO:0044271	cellular nitrogen compound biosynthetic process	155/2388	7.56e-11	155	1.55e-06
GO:0030246	carbohydrate binding	62/2388	8.47e-11	62	1.74e-06
GO:0065008	regulation of biological quality	395/2388	9.43e-11	395	1.94e-06
GO:0004497	monooxygenase activity	29/2388	9.57e-11	29	1.97e-06
GO:0046031	ADP metabolic process	23/2388	1.04e-10	23	2.13e-06
GO:0032553	ribonucleotide binding	309/2388	1.15e-10	309	2.36e-06
GO:1901292	nucleoside phosphate catabolic process	33/2388	1.18e-10	33	2.43e-06
GO:0017076	purine nucleotide binding	308/2388	1.39e-10	308	2.85e-06
GO:0032555	purine ribonucleotide binding	307/2388	1.69e-10	307	3.48e-06
GO:0009161	ribonucleoside monophosphate metabolic process	40/2388	1.7e-10	40	3.49e-06
GO:0009205	purine ribonucleoside triphosphate metabolic process	39/2388	2.28e-10	39	4.69e-06
GO:0009123	nucleoside monophosphate metabolic process	41/2388	2.54e-10	41	5.22e-06
GO:0009167	purine ribonucleoside monophosphate metabolic process	38/2388	2.64e-10	38	5.43e-06
GO:0006096	glycolytic process	21/2388	2.67e-10	21	5.48e-06
GO:0035639	purine ribonucleoside triphosphate binding	300/2388	2.86e-10	300	5.88e-06
GO:0051246	regulation of protein metabolic process	279/2388	3.05e-10	279	6.27e-06
GO:0050789	regulation of biological process	978/2388	3.14e-10	978	6.45e-06
GO:0009166	nucleotide catabolic process	31/2388	3.19e-10	31	6.55e-06
GO:0042866	pyruvate biosynthetic process	21/2388	3.6e-10	21	7.4e-06
GO:0006757	ATP generation from ADP	21/2388	3.6e-10	21	7.4e-06
GO:0009126	purine nucleoside monophosphate metabolic process	38/2388	4.1e-10	38	8.43e-06
GO:0016787	hydrolase activity	342/2388	4.17e-10	342	8.56e-06
GO:0005506	iron ion binding	34/2388	4.32e-10	34	8.88e-06
GO:0016616	oxidoreductase activity, acting on the CH-OH group of donors, NAD or NADP as acceptor	34/2388	4.32e-10	34	8.88e-06
GO:0009135	purine nucleoside diphosphate metabolic process	23/2388	5.23e-10	23	1.07e-05
GO:0009179	purine ribonucleoside diphosphate metabolic process	23/2388	5.23e-10	23	1.07e-05
GO:0046034	ATP metabolic process	33/2388	5.61e-10	33	1.15e-05
GO:0022624	proteasome accessory complex	2388-12-01	6.79e-10	12	1.4e-05
GO:0009199	ribonucleoside triphosphate metabolic process	39/2388	7.08e-10	39	1.45e-05
GO:0043207	response to external biotic stimulus	96/2388	7.46e-10	96	1.53e-05
GO:0009141	nucleoside triphosphate metabolic process	42/2388	8.99e-10	42	1.85e-05
GO:1901700	response to oxygen-containing compound	164/2388	9.23e-10	164	1.9e-05
GO:0016614	oxidoreductase activity, acting on CH-OH group of donors	35/2388	9.82e-10	35	2.02e-05
GO:0019221	cytokine-mediated signaling pathway	50/2388	1.01e-09	50	2.08e-05
GO:0001848	complement binding	15/2388	1.01e-09	15	2.08e-05
GO:0009185	ribonucleoside diphosphate metabolic process	23/2388	1.1e-09	23	2.27e-05
GO:0009607	response to biotic stimulus	97/2388	1.17e-09	97	2.4e-05
GO:0009144	purine nucleoside triphosphate metabolic process	39/2388	1.22e-09	39	2.5e-05
GO:0019693	ribose phosphate metabolic process	59/2388	1.34e-09	59	2.76e-05
GO:0006090	pyruvate metabolic process	23/2388	1.41e-09	23	2.89e-05
GO:0006165	nucleoside diphosphate phosphorylation	22/2388	1.47e-09	22	3.03e-05
GO:0016051	carbohydrate biosynthetic process	29/2388	1.49e-09	29	3.05e-05
GO:0001872	(1->3)-beta-D-glucan binding	2388-11-01	1.51e-09	11	3.1e-05
GO:0034655	nucleobase-containing compound catabolic process	54/2388	1.72e-09	54	3.54e-05
GO:0006665	sphingolipid metabolic process	33/2388	1.73e-09	33	3.55e-05
GO:0042119	neutrophil activation	39/2388	2.06e-09	39	4.23e-05
GO:0031974	membrane-enclosed lumen	97/2388	2.22e-09	97	4.57e-05
GO:0043233	organelle lumen	97/2388	2.22e-09	97	4.57e-05
GO:0036230	granulocyte activation	39/2388	2.34e-09	39	4.81e-05
GO:0030148	sphingolipid biosynthetic process	24/2388	2.53e-09	24	5.19e-05
GO:1905369	endopeptidase complex	18/2388	2.57e-09	18	5.28e-05
GO:0005996	monosaccharide metabolic process	37/2388	2.59e-09	37	5.33e-05
GO:0046434	organophosphate catabolic process	38/2388	2.82e-09	38	5.8e-05
GO:0070013	intracellular organelle lumen	96/2388	3.25e-09	96	6.67e-05
GO:0046513	ceramide biosynthetic process	17/2388	3.9e-09	17	8.02e-05
GO:0046939	nucleotide phosphorylation	22/2388	3.92e-09	22	8.04e-05
GO:1901361	organic cyclic compound catabolic process	63/2388	4.03e-09	63	8.28e-05
GO:0006810	transport	399/2388	4.19e-09	399	8.6e-05
GO:0006955	immune response	95/2388	4.23e-09	95	8.69e-05
GO:0046165	alcohol biosynthetic process	24/2388	4.8e-09	24	9.85e-05
GO:0002283	neutrophil activation involved in immune response	37/2388	5.03e-09	37	0.000103
GO:1901135	carbohydrate derivative metabolic process	105/2388	6.32e-09	105	0.00013
GO:0001775	cell activation	87/2388	6.43e-09	87	0.000132
GO:0002275	myeloid cell activation involved in immune response	39/2388	7.21e-09	39	0.000148
GO:0043299	leukocyte degranulation	37/2388	7.4e-09	37	0.000152
GO:0006957	complement activation, alternative pathway	13/2388	8.14e-09	13	0.000167
GO:0009156	ribonucleoside monophosphate biosynthetic process	30/2388	8.66e-09	30	0.000178
GO:2000145	regulation of cell motility	124/2388	8.96e-09	124	0.000184
GO:0002274	myeloid leukocyte activation	44/2388	9.42e-09	44	0.000193
GO:0048583	regulation of response to stimulus	394/2388	9.7e-09	394	0.000199
GO:0051234	establishment of localization	408/2388	1e-08	408	0.000206
GO:0048584	positive regulation of response to stimulus	225/2388	1.06e-08	225	0.000217
GO:1904813	ficolin-1-rich granule lumen	16/2388	1.14e-08	16	0.000234
GO:0040012	regulation of locomotion	136/2388	1.24e-08	136	0.000254
GO:0009127	purine nucleoside monophosphate biosynthetic process	28/2388	1.27e-08	28	0.00026
GO:0043231	intracellular membrane-bounded organelle	742/2388	1.36e-08	742	0.000279
GO:0002682	regulation of immune system process	146/2388	1.38e-08	146	0.000284
GO:0000502	proteasome complex	17/2388	1.39e-08	17	0.000285
GO:0050794	regulation of cellular process	905/2388	1.54e-08	905	0.000317
GO:0009206	purine ribonucleoside triphosphate biosynthetic process	25/2388	1.56e-08	25	0.000321
GO:0045321	leukocyte activation	76/2388	1.65e-08	76	0.000338
GO:0043312	neutrophil degranulation	35/2388	1.81e-08	35	0.000372
GO:0009124	nucleoside monophosphate biosynthetic process	30/2388	1.86e-08	30	0.000382
GO:0006672	ceramide metabolic process	22/2388	1.87e-08	22	0.000383
GO:0009132	nucleoside diphosphate metabolic process	23/2388	1.94e-08	23	0.000398
GO:0046700	heterocycle catabolic process	58/2388	2.09e-08	58	0.000429
GO:0009145	purine nucleoside triphosphate biosynthetic process	25/2388	2.25e-08	25	0.000461
GO:1901568	fatty acid derivative metabolic process	25/2388	2.25e-08	25	0.000461
GO:0051707	response to other organism	70/2388	2.37e-08	70	0.000487
GO:0002687	positive regulation of leukocyte migration	28/2388	2.82e-08	28	0.000579
GO:0033993	response to lipid	97/2388	3.29e-08	97	0.000676
GO:0072655	establishment of protein localization to mitochondrion	17/2388	3.31e-08	17	0.000681
GO:0098798	mitochondrial protein complex	40/2388	3.61e-08	40	0.000741
GO:1990204	oxidoreductase complex	24/2388	4.05e-08	24	0.000833
GO:0006754	ATP biosynthetic process	23/2388	4.2e-08	23	0.000864
GO:0070585	protein localization to mitochondrion	18/2388	4.39e-08	18	0.000901
GO:0043604	amide biosynthetic process	45/2388	4.57e-08	45	0.00094
GO:0030335	positive regulation of cell migration	78/2388	4.84e-08	78	0.000995
GO:0006790	sulfur compound metabolic process	48/2388	5.03e-08	48	0.00103
GO:2000147	positive regulation of cell motility	80/2388	5.08e-08	80	0.00104
GO:0040017	positive regulation of locomotion	83/2388	5.62e-08	83	0.00115
GO:0009142	nucleoside triphosphate biosynthetic process	27/2388	5.94e-08	27	0.00122
GO:0008360	regulation of cell shape	40/2388	6.13e-08	40	0.00126
GO:0009201	ribonucleoside triphosphate biosynthetic process	25/2388	6.33e-08	25	0.0013
GO:0006959	humoral immune response	25/2388	6.33e-08	25	0.0013
GO:0031982	vesicle	235/2388	6.39e-08	235	0.00131
GO:0043209	myelin sheath	29/2388	6.91e-08	29	0.00142
GO:0006002	fructose 6-phosphate metabolic process	2388-09-01	6.97e-08	9	0.00143
GO:0008144	drug binding	270/2388	7.31e-08	270	0.0015
GO:0009986	cell surface	81/2388	7.69e-08	81	0.00158
GO:0019439	aromatic compound catabolic process	57/2388	8.77e-08	57	0.0018
GO:0005515	protein binding	690/2388	9.04e-08	690	0.00186
GO:0006979	response to oxidative stress	51/2388	1.02e-07	51	0.00209
GO:0050778	positive regulation of immune response	74/2388	1.03e-07	74	0.00213
GO:0051270	regulation of cellular component movement	131/2388	1.04e-07	131	0.00214
GO:1901565	organonitrogen compound catabolic process	97/2388	1.08e-07	97	0.00221
GO:0050776	regulation of immune response	97/2388	1.29e-07	97	0.00266
GO:0005615	extracellular space	142/2388	1.32e-07	142	0.00271
GO:0006636	unsaturated fatty acid biosynthetic process	14/2388	1.35e-07	14	0.00278
GO:0000054	ribosomal subunit export from nucleus	2388-09-01	1.4e-07	9	0.00288
GO:0071426	ribonucleoprotein complex export from nucleus	2388-09-01	1.4e-07	9	0.00288
GO:0071428	rRNA-containing ribonucleoprotein complex export from nucleus	2388-09-01	1.4e-07	9	0.00288
GO:0033750	ribosome localization	2388-09-01	1.4e-07	9	0.00288
GO:0044270	cellular nitrogen compound catabolic process	56/2388	1.77e-07	56	0.00364
GO:0045087	innate immune response	56/2388	1.77e-07	56	0.00364
GO:0019318	hexose metabolic process	29/2388	1.8e-07	29	0.0037
GO:0035383	thioester metabolic process	21/2388	1.98e-07	21	0.00408
GO:0006637	acyl-CoA metabolic process	21/2388	1.98e-07	21	0.00408
GO:1990542	mitochondrial transmembrane transport	20/2388	2.02e-07	20	0.00415
GO:0046365	monosaccharide catabolic process	2388-12-01	2.02e-07	12	0.00415
GO:0051272	positive regulation of cellular component movement	80/2388	2.05e-07	80	0.00421
GO:0044455	mitochondrial membrane part	34/2388	2.16e-07	34	0.00445
GO:0009259	ribonucleotide metabolic process	52/2388	2.2e-07	52	0.00452
GO:0070887	cellular response to chemical stimulus	183/2388	2.2e-07	183	0.00452
GO:0006643	membrane lipid metabolic process	34/2388	2.42e-07	34	0.00497
GO:1905368	peptidase complex	19/2388	2.43e-07	19	0.00498
GO:0006839	mitochondrial transport	24/2388	2.57e-07	24	0.00528
GO:0006006	glucose metabolic process	24/2388	2.57e-07	24	0.00528
GO:0046467	membrane lipid biosynthetic process	25/2388	2.63e-07	25	0.00539
GO:0051704	multi-organism process	120/2388	2.68e-07	120	0.00551
GO:0009055	electron transfer activity	18/2388	2.84e-07	18	0.00584
GO:1901137	carbohydrate derivative biosynthetic process	63/2388	2.87e-07	63	0.00589
GO:0031970	organelle envelope lumen	20/2388	2.97e-07	20	0.0061
GO:0030334	regulation of cell migration	114/2388	3.24e-07	114	0.00665
GO:0051179	localization	445/2388	3.37e-07	445	0.00693
GO:0046364	monosaccharide biosynthetic process	14/2388	3.4e-07	14	0.00699
GO:0001871	pattern binding	14/2388	3.4e-07	14	0.00699
GO:0030247	polysaccharide binding	14/2388	3.4e-07	14	0.00699
GO:0010941	regulation of cell death	162/2388	3.65e-07	162	0.00751
GO:0009150	purine ribonucleotide metabolic process	50/2388	3.68e-07	50	0.00756
GO:0006779	porphyrin-containing compound biosynthetic process	2388-11-01	3.97e-07	11	0.00816
GO:0032268	regulation of cellular protein metabolic process	245/2388	4.03e-07	245	0.00829
GO:0005759	mitochondrial matrix	38/2388	4.66e-07	38	0.00957
GO:0005783	endoplasmic reticulum	127/2388	4.67e-07	127	0.00959
GO:0032154	cleavage furrow	24/2388	4.74e-07	24	0.00974
GO:1901293	nucleoside phosphate biosynthetic process	44/2388	5.37e-07	44	0.011
GO:1903561	extracellular vesicle	107/2388	5.46e-07	107	0.0112
GO:0006457	protein folding	32/2388	5.91e-07	32	0.0121
GO:0009725	response to hormone	87/2388	6.02e-07	87	0.0124
GO:0033013	tetrapyrrole metabolic process	15/2388	6.03e-07	15	0.0124
GO:0055072	iron ion homeostasis	22/2388	6.14e-07	22	0.0126
GO:0050660	flavin adenine dinucleotide binding	20/2388	7.38e-07	20	0.0152
GO:0043230	extracellular organelle	107/2388	7.51e-07	107	0.0154
GO:0072521	purine-containing compound metabolic process	55/2388	7.53e-07	55	0.0155
GO:0051174	regulation of phosphorus metabolic process	186/2388	7.56e-07	186	0.0155
GO:0009966	regulation of signal transduction	306/2388	7.8e-07	306	0.016
GO:0070062	extracellular exosome	105/2388	7.81e-07	105	0.0161
GO:0006690	icosanoid metabolic process	18/2388	7.95e-07	18	0.0163
GO:0006163	purine nucleotide metabolic process	51/2388	8.06e-07	51	0.0166
GO:0055076	transition metal ion homeostasis	25/2388	8.26e-07	25	0.017
GO:0071702	organic substance transport	210/2388	8.45e-07	210	0.0174
GO:0005576	extracellular region	139/2388	8.71e-07	139	0.0179
GO:0019538	protein metabolic process	341/2388	9.08e-07	341	0.0187
GO:0022603	regulation of anatomical structure morphogenesis	148/2388	9.48e-07	148	0.0195
GO:0042592	homeostatic process	168/2388	1.02e-06	168	0.0209
GO:0030554	adenyl nucleotide binding	245/2388	1.08e-06	245	0.0221
GO:0055065	metal ion homeostasis	85/2388	1.08e-06	85	0.0222
GO:0005750	mitochondrial respiratory chain complex III	2388-06-01	1.09e-06	6	0.0224
GO:0048518	positive regulation of biological process	548/2388	1.13e-06	548	0.0232
GO:0044262	cellular carbohydrate metabolic process	31/2388	1.15e-06	31	0.0236
GO:0042802	identical protein binding	194/2388	1.16e-06	194	0.0239
GO:0005758	mitochondrial intermembrane space	18/2388	1.17e-06	18	0.024
GO:0033014	tetrapyrrole biosynthetic process	2388-11-01	1.25e-06	11	0.0258
GO:0019682	glyceraldehyde-3-phosphate metabolic process	2388-08-01	1.26e-06	8	0.026
GO:0032559	adenyl ribonucleotide binding	244/2388	1.28e-06	244	0.0264
GO:0032155	cell division site part	24/2388	1.29e-06	24	0.0266
GO:0005811	lipid droplet	18/2388	1.41e-06	18	0.029
GO:0042127	regulation of cell proliferation	160/2388	1.48e-06	160	0.0304
GO:0051082	unfolded protein binding	23/2388	1.53e-06	23	0.0314
GO:0006098	pentose-phosphate shunt	2388-07-01	1.55e-06	7	0.0319
GO:0030388	fructose 1,6-bisphosphate metabolic process	2388-07-01	1.55e-06	7	0.0319
GO:0048585	negative regulation of response to stimulus	170/2388	1.69e-06	170	0.0347
GO:0098800	inner mitochondrial membrane protein complex	23/2388	1.76e-06	23	0.0362
GO:1904018	positive regulation of vasculature development	34/2388	1.8e-06	34	0.0369
GO:0005524	ATP binding	238/2388	1.82e-06	238	0.0374
GO:0019220	regulation of phosphate metabolic process	183/2388	1.84e-06	183	0.0378
GO:0009617	response to bacterium	39/2388	1.88e-06	39	0.0387
GO:0002685	regulation of leukocyte migration	32/2388	1.89e-06	32	0.0389
GO:0032868	response to insulin	31/2388	1.95e-06	31	0.0401
GO:0055080	cation homeostasis	91/2388	1.98e-06	91	0.0406
GO:0030234	enzyme regulator activity	117/2388	2.09e-06	117	0.0428
GO:0033559	unsaturated fatty acid metabolic process	17/2388	2.11e-06	17	0.0434
GO:0016747	transferase activity, transferring acyl groups other than amino-acyl groups	38/2388	2.13e-06	38	0.0438
GO:0020037	heme binding	26/2388	2.18e-06	26	0.0447
GO:0009165	nucleotide biosynthetic process	42/2388	2.19e-06	42	0.045
GO:0051345	positive regulation of hydrolase activity	72/2388	2.23e-06	72	0.0458
GO:0098771	inorganic ion homeostasis	92/2388	2.32e-06	92	0.0476
GO:0044282	small molecule catabolic process	49/2388	2.38e-06	49	0.0489
GO:0008654	phospholipid biosynthetic process	30/2388	2.47e-06	30	0.0507
GO:0042325	regulation of phosphorylation	165/2388	2.54e-06	165	0.0522
GO:0019674	NAD metabolic process	17/2388	2.55e-06	17	0.0524
GO:1902531	regulation of intracellular signal transduction	198/2388	2.74e-06	198	0.0563
GO:0023057	negative regulation of signaling	151/2388	2.75e-06	151	0.0564
GO:0002697	regulation of immune effector process	45/2388	2.78e-06	45	0.057
GO:0034774	secretory granule lumen	21/2388	2.8e-06	21	0.0575
GO:0032550	purine ribonucleoside binding	69/2388	3.02e-06	69	0.062
GO:0006956	complement activation	15/2388	3.06e-06	15	0.0628
GO:0048878	chemical homeostasis	130/2388	3.11e-06	130	0.0638
GO:0008541	proteasome regulatory particle, lid subcomplex	2388-06-01	3.1e-06	6	0.0638
GO:0051336	regulation of hydrolase activity	107/2388	3.13e-06	107	0.0643
GO:1902533	positive regulation of intracellular signal transduction	115/2388	3.29e-06	115	0.0675
GO:0007005	mitochondrion organization	42/2388	3.41e-06	42	0.0701
GO:0005623	cell	25/2388	3.42e-06	25	0.0702
GO:0001883	purine nucleoside binding	69/2388	3.43e-06	69	0.0705
GO:0032549	ribonucleoside binding	69/2388	3.43e-06	69	0.0705
GO:0031983	vesicle lumen	23/2388	3.47e-06	23	0.0714
GO:0019320	hexose catabolic process	2388-10-01	3.72e-06	10	0.0764
GO:0035384	thioester biosynthetic process	13/2388	3.79e-06	13	0.0778
GO:0071616	acyl-CoA biosynthetic process	13/2388	3.79e-06	13	0.0778
GO:0051156	glucose 6-phosphate metabolic process	2388-08-01	3.86e-06	8	0.0793
GO:0030155	regulation of cell adhesion	92/2388	4.01e-06	92	0.0824
GO:0031597	cytosolic proteasome complex	2388-05-01	4.16e-06	5	0.0855
GO:0001882	nucleoside binding	70/2388	4.22e-06	70	0.0867
GO:1901681	sulfur compound binding	43/2388	4.33e-06	43	0.0889
GO:0006644	phospholipid metabolic process	47/2388	4.38e-06	47	0.0899
GO:0005525	GTP binding	68/2388	4.47e-06	68	0.0919
GO:0030162	regulation of proteolysis	72/2388	4.55e-06	72	0.0935
GO:0032270	positive regulation of cellular protein metabolic process	156/2388	4.71e-06	156	0.0967
GO:0009168	purine ribonucleoside monophosphate biosynthetic process	28/2388	1.27e-0828	0.00026
GO:0048010	vascular endothelial growth factor receptor signaling pathway	15/2388	2.46e-0615	0.0506

## Sheet: GO_platax_ctsvsinf_downninf_24h
Gene Ontology enrichmentfor DEGs up-regulated in control at 24hpi vs infected
GO_term	GO_name	Ratio	P	n_study	Bonferroni adj. P
GO:0032502	developmental process	1039/3631	8.81e-53	1039	1.81e-48
GO:0030198	extracellular matrix organization	132/3631	2.43e-42	132	5e-38
GO:0009653	anatomical structure morphogenesis	413/3631	6.57e-38	413	1.35e-33
GO:0048856	anatomical structure development	730/3631	1e-37	730	2.06e-33
GO:0043062	extracellular structure organization	133/3631	1.37e-35	133	2.82e-31
GO:0007155	cell adhesion	291/3631	4.47e-32	291	9.18e-28
GO:0022610	biological adhesion	291/3631	9.88e-32	291	2.03e-27
GO:0050794	regulation of cellular process	1499/3631	6.55e-31	1499	1.35e-26
GO:0007166	cell surface receptor signaling pathway	401/3631	1.53e-30	401	3.14e-26
GO:0009887	animal organ morphogenesis	173/3631	5.7e-29	173	1.17e-24
GO:0048869	cellular developmental process	579/3631	1.87e-28	579	3.85e-24
GO:0048598	embryonic morphogenesis	162/3631	1.17e-27	162	2.41e-23
GO:0050789	regulation of biological process	1565/3631	1.27e-26	1565	2.6e-22
GO:0050793	regulation of developmental process	518/3631	1.66e-26	518	3.42e-22
GO:0008150	biological_process	2387/3631	2.08e-26	2387	4.27e-22
GO:0048523	negative regulation of cellular process	744/3631	2.21e-26	744	4.53e-22
GO:0030154	cell differentiation	388/3631	3.95e-25	388	8.11e-21
GO:0065007	biological regulation	1639/3631	5.82e-25	1639	1.2e-20
GO:0009888	tissue development	171/3631	8.22e-25	171	1.69e-20
GO:0009966	regulation of signal transduction	541/3631	1.7e-24	541	3.5e-20
GO:2000026	regulation of multicellular organismal development	426/3631	6.28e-24	426	1.29e-19
GO:0048583	regulation of response to stimulus	656/3631	2.4e-23	656	4.94e-19
GO:0010646	regulation of cell communication	605/3631	6.59e-23	605	1.35e-18
GO:0030199	collagen fibril organization	44/3631	7.06e-23	44	1.45e-18
GO:0022603	regulation of anatomical structure morphogenesis	273/3631	8.64e-23	273	1.77e-18
GO:0048513	animal organ development	324/3631	9.05e-23	324	1.86e-18
GO:0000902	cell morphogenesis	89/3631	1.13e-22	89	2.31e-18
GO:0051239	regulation of multicellular organismal process	574/3631	2.29e-22	574	4.71e-18
GO:0048519	negative regulation of biological process	777/3631	4.2e-22	777	8.63e-18
GO:0048522	positive regulation of cellular process	831/3631	5.94e-22	831	1.22e-17
GO:0045595	regulation of cell differentiation	374/3631	1.02e-21	374	2.09e-17
GO:0023051	regulation of signaling	601/3631	2.06e-21	601	4.22e-17
GO:2001141	regulation of RNA biosynthetic process	493/3631	2.92e-20	493	6e-16
GO:0006355	regulation of transcription, DNA-templated	491/3631	4.65e-20	491	9.54e-16
GO:1903506	regulation of nucleic acid-templated transcription	492/3631	4.9e-20	492	1.01e-15
GO:0048518	positive regulation of biological process	905/3631	5.77e-20	905	1.19e-15
GO:0016477	cell migration	205/3631	9.79e-19	205	2.01e-14
GO:0000904	cell morphogenesis involved in differentiation	61/3631	1.85e-18	61	3.79e-14
GO:0048585	negative regulation of response to stimulus	297/3631	2.3e-18	297	4.73e-14
GO:0009987	cellular process	1952/3631	4.79e-18	1952	9.83e-14
GO:0010648	negative regulation of cell communication	266/3631	5.75e-18	266	1.18e-13
GO:0023057	negative regulation of signaling	266/3631	5.98e-18	266	1.23e-13
GO:0051093	negative regulation of developmental process	204/3631	7.3e-18	204	1.5e-13
GO:0048729	tissue morphogenesis	144/3631	9.71e-18	144	2e-13
GO:0048562	embryonic organ morphogenesis	61/3631	3.53e-17	61	7.26e-13
GO:0009968	negative regulation of signal transduction	244/3631	3.59e-17	244	7.38e-13
GO:0031323	regulation of cellular metabolic process	810/3631	5.64e-17	810	1.16e-12
GO:0051241	negative regulation of multicellular organismal process	235/3631	8.33e-17	235	1.71e-12
GO:0051252	regulation of RNA metabolic process	512/3631	9.79e-17	512	2.01e-12
GO:0051171	regulation of nitrogen compound metabolic process	772/3631	1.67e-16	772	3.43e-12
GO:0010556	regulation of macromolecule biosynthetic process	539/3631	1.68e-16	539	3.45e-12
GO:0001503	ossification	62/3631	2.68e-16	62	5.5e-12
GO:0030334	regulation of cell migration	193/3631	3.47e-16	193	7.12e-12
GO:0060255	regulation of macromolecule metabolic process	794/3631	3.69e-16	794	7.59e-12
GO:0006928	movement of cell or subcellular component	300/3631	7.05e-16	300	1.45e-11
GO:0001667	ameboidal-type cell migration	74/3631	9.93e-16	74	2.04e-11
GO:0048870	cell motility	211/3631	1e-15	211	2.06e-11
GO:0048646	anatomical structure formation involved in morphogenesis	218/3631	1.1e-15	218	2.26e-11
GO:0003414	chondrocyte morphogenesis involved in endochondral bone morphogenesis	24/3631	1.16e-15	24	2.37e-11
GO:0090171	chondrocyte morphogenesis	24/3631	1.16e-15	24	2.37e-11
GO:0003429	growth plate cartilage chondrocyte morphogenesis	24/3631	1.16e-15	24	2.37e-11
GO:0003422	growth plate cartilage morphogenesis	24/3631	1.16e-15	24	2.37e-11
GO:0019222	regulation of metabolic process	853/3631	1.23e-15	853	2.53e-11
GO:2000112	regulation of cellular macromolecule biosynthetic process	525/3631	1.24e-15	525	2.55e-11
GO:0042127	regulation of cell proliferation	269/3631	1.71e-15	269	3.5e-11
GO:0080090	regulation of primary metabolic process	785/3631	1.76e-15	785	3.63e-11
GO:0019219	regulation of nucleobase-containing compound metabolic process	544/3631	1.77e-15	544	3.63e-11
GO:0007165	signal transduction	671/3631	2.31e-15	671	4.75e-11
GO:0032501	multicellular organismal process	583/3631	2.52e-15	583	5.19e-11
GO:0006357	regulation of transcription by RNA polymerase II	326/3631	2.65e-15	326	5.45e-11
GO:0031326	regulation of cellular biosynthetic process	555/3631	3.06e-15	555	6.28e-11
GO:2000145	regulation of cell motility	196/3631	3.57e-15	196	7.33e-11
GO:0002009	morphogenesis of an epithelium	103/3631	4.45e-15	103	9.14e-11
GO:0060536	cartilage morphogenesis	27/3631	5.2e-15	27	1.07e-10
GO:0009889	regulation of biosynthetic process	560/3631	9.1e-15	560	1.87e-10
GO:0051270	regulation of cellular component movement	212/3631	1.04e-14	212	2.15e-10
GO:0040012	regulation of locomotion	214/3631	1.06e-14	214	2.17e-10
GO:0007156	homophilic cell adhesion via plasma membrane adhesion molecules	82/3631	1.25e-14	82	2.56e-10
GO:0001755	neural crest cell migration	41/3631	1.41e-14	41	2.9e-10
GO:0051128	regulation of cellular component organization	452/3631	1.83e-14	452	3.76e-10
GO:0098742	cell-cell adhesion via plasma-membrane adhesion molecules	104/3631	2.04e-14	104	4.2e-10
GO:0120035	regulation of plasma membrane bounded cell projection organization	192/3631	4.27e-14192	8.77e-10
GO:0031344	regulation of cell projection organization	192/3631	7.46e-14	192	1.53e-09
GO:0040011	locomotion	222/3631	8.28e-14	222	1.7e-09
GO:0098609	cell-cell adhesion	138/3631	1.23e-13	138	2.52e-09
GO:0000122	negative regulation of transcription by RNA polymerase II	151/3631	1.88e-13	151	3.86e-09
GO:0007411	axon guidance	90/3631	3.32e-13	90	6.81e-09
GO:0007389	pattern specification process	122/3631	4.08e-13	122	8.38e-09
GO:0097485	neuron projection guidance	90/3631	5.44e-13	90	1.12e-08
GO:0031325	positive regulation of cellular metabolic process	471/3631	5.66e-13	471	1.16e-08
GO:0051173	positive regulation of nitrogen compound metabolic process	457/3631	6.08e-13	457	1.25e-08
GO:0045892	negative regulation of transcription, DNA-templated	199/3631	1.22e-12	199	2.51e-08
GO:1903507	negative regulation of nucleic acid-templated transcription	199/3631	1.79e-12	199	3.67e-08
GO:1902679	negative regulation of RNA biosynthetic process	199/3631	1.79e-12	199	3.67e-08
GO:0032989	cellular component morphogenesis	136/3631	2.24e-12	136	4.59e-08
GO:0060284	regulation of cell development	225/3631	5.06e-12	225	1.04e-07
GO:0040013	negative regulation of locomotion	91/3631	7.97e-12	91	1.64e-07
GO:0048704	embryonic skeletal system morphogenesis	35/3631	8.73e-12	35	1.79e-07
GO:1902531	regulation of intracellular signal transduction	315/3631	9.04e-12	315	1.86e-07
GO:0010468	regulation of gene expression	572/3631	9.46e-12	572	1.94e-07
GO:0010604	positive regulation of macromolecule metabolic process	477/3631	1.27e-11	477	2.61e-07
GO:0022604	regulation of cell morphogenesis	151/3631	1.47e-11	151	3.02e-07
GO:0045596	negative regulation of cell differentiation	146/3631	1.88e-11	146	3.87e-07
GO:0048705	skeletal system morphogenesis	42/3631	2.17e-11	42	4.46e-07
GO:0051240	positive regulation of multicellular organismal process	298/3631	2.55e-11	298	5.23e-07
GO:0045165	cell fate commitment	46/3631	2.62e-11	46	5.38e-07
GO:0044087	regulation of cellular component biogenesis	201/3631	2.75e-11	201	5.64e-07
GO:0009893	positive regulation of metabolic process	504/3631	2.95e-11	504	6.06e-07
GO:0072137	condensed mesenchymal cell proliferation	17/3631	2.98e-11	17	6.11e-07
GO:0007157	heterophilic cell-cell adhesion via plasma membrane cell adhesion molecules	35/3631	3.7e-11	35	7.59e-07
GO:0042476	odontogenesis	35/3631	3.7e-11	35	7.59e-07
GO:0045664	regulation of neuron differentiation	178/3631	4.21e-11	178	8.66e-07
GO:0090286	cytoskeletal anchoring at nuclear membrane	22/3631	4.28e-11	22	8.79e-07
GO:0030278	regulation of ossification	54/3631	4.65e-11	54	9.56e-07
GO:0035239	tube morphogenesis	90/3631	5.67e-11	90	1.16e-06
GO:0050767	regulation of neurogenesis	203/3631	5.99e-11	203	1.23e-06
GO:0051271	negative regulation of cellular component movement	80/3631	6.6e-11	80	1.36e-06
GO:0030500	regulation of bone mineralization	32/3631	7.24e-11	32	1.49e-06
GO:2000113	negative regulation of cellular macromolecule biosynthetic process	219/3631	8.09e-11219	1.66e-06
GO:0010558	negative regulation of macromolecule biosynthetic process	225/3631	8.48e-11	225	1.74e-06
GO:0031401	positive regulation of protein modification process	202/3631	1.26e-10	202	2.6e-06
GO:0010769	regulation of cell morphogenesis involved in differentiation	111/3631	1.52e-10	111	3.11e-06
GO:0010463	mesenchymal cell proliferation	19/3631	1.56e-10	19	3.2e-06
GO:0007167	enzyme linked receptor protein signaling pathway	139/3631	1.67e-10	139	3.44e-06
GO:0050771	negative regulation of axonogenesis	39/3631	1.68e-10	39	3.45e-06
GO:0001934	positive regulation of protein phosphorylation	172/3631	3.29e-10	172	6.76e-06
GO:0042327	positive regulation of phosphorylation	179/3631	3.32e-10	179	6.83e-06
GO:0051253	negative regulation of RNA metabolic process	203/3631	3.43e-10	203	7.06e-06
GO:0030335	positive regulation of cell migration	113/3631	3.94e-10	113	8.1e-06
GO:1903508	positive regulation of nucleic acid-templated transcription	245/3631	4.46e-10	245	9.16e-06
GO:1902680	positive regulation of RNA biosynthetic process	245/3631	4.46e-10	245	9.16e-06
GO:0051094	positive regulation of developmental process	251/3631	4.47e-10	251	9.18e-06
GO:0016043	cellular component organization	785/3631	4.95e-10	785	1.02e-05
GO:0008284	positive regulation of cell proliferation	154/3631	4.95e-10	154	1.02e-05
GO:0001932	regulation of protein phosphorylation	241/3631	5.5e-10	241	1.13e-05
GO:0001501	skeletal system development	47/3631	5.5e-10	47	1.13e-05
GO:0045893	positive regulation of transcription, DNA-templated	244/3631	5.64e-10	244	1.16e-05
GO:0048640	negative regulation of developmental growth	44/3631	5.93e-10	44	1.22e-05
GO:0070167	regulation of biomineral tissue development	33/3631	7.36e-10	33	1.51e-05
GO:0008283	cell proliferation	113/3631	7.47e-10	113	1.54e-05
GO:2000147	positive regulation of cell motility	115/3631	7.55e-10	115	1.55e-05
GO:0010975	regulation of neuron projection development	147/3631	8.08e-10	147	1.66e-05
GO:0042325	regulation of phosphorylation	254/3631	8.83e-10	254	1.81e-05
GO:0009890	negative regulation of biosynthetic process	235/3631	9.81e-10	235	2.02e-05
GO:0031399	regulation of protein modification process	285/3631	1e-09	285	2.06e-05
GO:0009953	dorsal/ventral pattern formation	35/3631	1.02e-09	35	2.09e-05
GO:0007423	sensory organ development	55/3631	1.09e-09	55	2.24e-05
GO:0050919	negative chemotaxis	24/3631	1.12e-09	24	2.3e-05
GO:0045597	positive regulation of cell differentiation	191/3631	1.21e-09	191	2.48e-05
GO:0060021	roof of mouth development	30/3631	1.23e-09	30	2.54e-05
GO:0031327	negative regulation of cellular biosynthetic process	231/3631	1.27e-09	231	2.6e-05
GO:0048670	regulation of collateral sprouting	21/3631	1.3e-09	21	2.67e-05
GO:0031346	positive regulation of cell projection organization	109/3631	1.38e-09	109	2.83e-05
GO:0051272	positive regulation of cellular component movement	117/3631	1.4e-09	117	2.88e-05
GO:0030517	negative regulation of axon extension	29/3631	1.43e-09	29	2.94e-05
GO:0010562	positive regulation of phosphorus metabolic process	188/3631	1.52e-09	188	3.11e-05
GO:0045937	positive regulation of phosphate metabolic process	188/3631	1.52e-09	188	3.11e-05
GO:0071709	membrane assembly	26/3631	2.02e-09	26	4.15e-05
GO:0035295	tube development	59/3631	2.12e-09	59	4.36e-05
GO:0010557	positive regulation of macromolecule biosynthetic process	269/3631	2.35e-09	269	4.82e-05
GO:0071840	cellular component organization or biogenesis	786/3631	2.37e-09	786	4.86e-05
GO:0051247	positive regulation of protein metabolic process	254/3631	3.07e-09	254	6.3e-05
GO:0051174	regulation of phosphorus metabolic process	279/3631	3.09e-09	279	6.35e-05
GO:0035987	endodermal cell differentiation	19/3631	3.23e-09	19	6.64e-05
GO:0035107	appendage morphogenesis	37/3631	4.48e-09	37	9.21e-05
GO:0001763	morphogenesis of a branching structure	49/3631	5.11e-09	49	0.000105
GO:0001654	eye development	45/3631	5.44e-09	45	0.000112
GO:0019220	regulation of phosphate metabolic process	276/3631	5.74e-09	276	0.000118
GO:0045778	positive regulation of ossification	32/3631	6.26e-09	32	0.000129
GO:0051254	positive regulation of RNA metabolic process	252/3631	6.55e-09	252	0.000135
GO:0010771	negative regulation of cell morphogenesis involved in differentiation	47/3631	6.55e-09	47	0.000135
GO:0045944	positive regulation of transcription by RNA polymerase II	186/3631	8.04e-09	186	0.000165
GO:0003002	regionalization	77/3631	8.35e-09	77	0.000171
GO:0090287	regulation of cellular response to growth factor stimulus	72/3631	8.59e-09	72	0.000176
GO:0061387	regulation of extent of cell growth	52/3631	8.78e-09	52	0.00018
GO:0031328	positive regulation of cellular biosynthetic process	276/3631	1.33e-08	276	0.000274
GO:0120032	regulation of plasma membrane bounded cell projection assembly	59/3631	1.35e-08	59	0.000277
GO:0032270	positive regulation of cellular protein metabolic process	236/3631	1.51e-08	236	0.00031
GO:0048839	inner ear development	27/3631	1.72e-08	27	0.000354
GO:0060272	embryonic skeletal joint morphogenesis	3631-09-01	1.81e-08	9	0.000372
GO:0008285	negative regulation of cell proliferation	118/3631	1.82e-08	118	0.000375
GO:0048638	regulation of developmental growth	89/3631	2.05e-08	89	0.000422
GO:0001658	branching involved in ureteric bud morphogenesis	24/3631	2.07e-08	24	0.000425
GO:0045934	negative regulation of nucleobase-containing compound metabolic process	216/3631	2.09e-08216	0.00043
GO:0051960	regulation of nervous system development	210/3631	2.14e-08	210	0.00044
GO:0044093	positive regulation of molecular function	243/3631	2.22e-08	243	0.000457
GO:0045935	positive regulation of nucleobase-containing compound metabolic process	270/3631	2.29e-08270	0.000471
GO:0040017	positive regulation of locomotion	115/3631	2.48e-08	115	0.000509
GO:0030178	negative regulation of Wnt signaling pathway	45/3631	2.6e-08	45	0.000534
GO:0030111	regulation of Wnt signaling pathway	74/3631	2.66e-08	74	0.000546
GO:0060491	regulation of cell projection assembly	59/3631	2.8e-08	59	0.000574
GO:0009891	positive regulation of biosynthetic process	279/3631	2.9e-08	279	0.000595
GO:0009967	positive regulation of signal transduction	244/3631	3.05e-08	244	0.000627
GO:0030308	negative regulation of cell growth	52/3631	3.22e-08	52	0.000661
GO:1905114	cell surface receptor signaling pathway involved in cell-cell signaling	76/3631	3.77e-08	76	0.000774
GO:0050922	negative regulation of chemotaxis	25/3631	4.13e-08	25	0.000848
GO:0030155	regulation of cell adhesion	137/3631	4.28e-08	137	0.000879
GO:0030855	epithelial cell differentiation	64/3631	4.28e-08	64	0.00088
GO:0042110	T cell activation	48/3631	4.34e-08	48	0.000891
GO:0071526	semaphorin-plexin signaling pathway	26/3631	4.47e-08	26	0.000919
GO:0060788	ectodermal placode formation	17/3631	4.65e-08	17	0.000954
GO:0031324	negative regulation of cellular metabolic process	334/3631	4.73e-08	334	0.000972
GO:0042330	taxis	62/3631	4.76e-08	62	0.000978
GO:0050770	regulation of axonogenesis	72/3631	4.9e-08	72	0.00101
GO:0070169	positive regulation of biomineral tissue development	21/3631	5.12e-08	21	0.00105
GO:1902668	negative regulation of axon guidance	20/3631	5.4e-08	20	0.00111
GO:0030501	positive regulation of bone mineralization	20/3631	5.4e-08	20	0.00111
GO:0010629	negative regulation of gene expression	235/3631	5.63e-08	235	0.00116
GO:0051172	negative regulation of nitrogen compound metabolic process	311/3631	5.73e-08	311	0.00118
GO:0010647	positive regulation of cell communication	271/3631	5.82e-08	271	0.00119
GO:0048565	digestive tract development	28/3631	6.08e-08	28	0.00125
GO:0051129	negative regulation of cellular component organization	141/3631	6.17e-08	141	0.00127
GO:0061138	morphogenesis of a branching epithelium	43/3631	6.24e-08	43	0.00128
GO:1903225	negative regulation of endodermal cell differentiation	3631-10-01	6.88e-08	10	0.00141
GO:0048731	system development	152/3631	7.24e-08	152	0.00149
GO:0042246	tissue regeneration	26/3631	7.37e-08	26	0.00151
GO:0007010	cytoskeleton organization	201/3631	7.41e-08	201	0.00152
GO:0043931	ossification involved in bone maturation	20/3631	7.54e-08	20	0.00155
GO:0035329	hippo signaling	19/3631	7.78e-08	19	0.0016
GO:0030182	neuron differentiation	75/3631	8.01e-08	75	0.00164
GO:0001649	osteoblast differentiation	24/3631	8.33e-08	24	0.00171
GO:0006935	chemotaxis	60/3631	8.82e-08	60	0.00181
GO:1902533	positive regulation of intracellular signal transduction	169/3631	9.16e-08	169	0.00188
GO:0060429	epithelium development	49/3631	9.57e-08	49	0.00197
GO:1901342	regulation of vasculature development	75/3631	9.69e-08	75	0.00199
GO:0048843	negative regulation of axon extension involved in axon guidance	19/3631	1.1e-07	19	0.00226
GO:1903671	negative regulation of sprouting angiogenesis	15/3631	1.16e-07	15	0.00238
GO:0032956	regulation of actin cytoskeleton organization	90/3631	1.24e-07	90	0.00254
GO:0050776	regulation of immune response	134/3631	1.35e-07	134	0.00277
GO:0045666	positive regulation of neuron differentiation	97/3631	1.44e-07	97	0.00295
GO:0032970	regulation of actin filament-based process	99/3631	1.44e-07	99	0.00297
GO:0090092	regulation of transmembrane receptor protein serine/threonine kinase signaling pathway	64/3631	1.44e-0764	0.00297
GO:0010628	positive regulation of gene expression	294/3631	1.65e-07	294	0.00338
GO:0016055	Wnt signaling pathway	73/3631	1.67e-07	73	0.00343
GO:0048584	positive regulation of response to stimulus	312/3631	1.9e-07	312	0.00391
GO:1901343	negative regulation of vasculature development	37/3631	2.01e-07	37	0.00413
GO:0097435	supramolecular fiber organization	120/3631	2.06e-07	120	0.00424
GO:0120036	plasma membrane bounded cell projection organization	152/3631	2.16e-07	152	0.00444
GO:0002376	immune system process	235/3631	2.24e-07	235	0.0046
GO:0031589	cell-substrate adhesion	44/3631	2.37e-07	44	0.00487
GO:1903670	regulation of sprouting angiogenesis	25/3631	2.37e-07	25	0.00487
GO:0048589	developmental growth	91/3631	2.71e-07	91	0.00557
GO:0051216	cartilage development	28/3631	2.78e-07	28	0.00572
GO:0035023	regulation of Rho protein signal transduction	56/3631	2.88e-07	56	0.00592
GO:0002682	regulation of immune system process	197/3631	3.01e-07	197	0.00618
GO:0040007	growth	92/3631	3.26e-07	92	0.0067
GO:0010605	negative regulation of macromolecule metabolic process	323/3631	3.5e-07	323	0.00719
GO:0045926	negative regulation of growth	58/3631	3.63e-07	58	0.00746
GO:0001558	regulation of cell growth	94/3631	3.76e-07	94	0.00772
GO:0023056	positive regulation of signaling	266/3631	3.81e-07	266	0.00784
GO:0007169	transmembrane receptor protein tyrosine kinase signaling pathway	99/3631	3.97e-07	99	0.00815
GO:0090292	nuclear matrix anchoring at nuclear membrane	15/3631	4.24e-07	15	0.00872
GO:0043578	nuclear matrix organization	15/3631	4.24e-07	15	0.00872
GO:0051130	positive regulation of cellular component organization	216/3631	5.73e-07	216	0.0118
GO:0051056	regulation of small GTPase mediated signal transduction	88/3631	5.79e-07	88	0.0119
GO:0042509	regulation of tyrosine phosphorylation of STAT protein	18/3631	5.98e-07	18	0.0123
GO:0010720	positive regulation of cell development	121/3631	6.37e-07	121	0.0131
GO:0110053	regulation of actin filament organization	71/3631	6.92e-07	71	0.0142
GO:0048738	cardiac muscle tissue development	19/3631	7.21e-07	19	0.0148
GO:1902017	regulation of cilium assembly	24/3631	7.44e-07	24	0.0153
GO:0035108	limb morphogenesis	28/3631	7.5e-07	28	0.0154
GO:0030336	negative regulation of cell migration	59/3631	7.6e-07	59	0.0156
GO:0009892	negative regulation of metabolic process	352/3631	7.65e-07	352	0.0157
GO:0046578	regulation of Ras protein signal transduction	73/3631	8.24e-07	73	0.0169
GO:0018212	peptidyl-tyrosine modification	28/3631	9.07e-07	28	0.0186
GO:0042475	odontogenesis of dentin-containing tooth	22/3631	9.25e-07	22	0.019
GO:0008015	blood circulation	16/3631	9.34e-07	16	0.0192
GO:0031333	negative regulation of protein complex assembly	41/3631	9.47e-07	41	0.0194
GO:0040008	regulation of growth	129/3631	1.03e-06	129	0.0211
GO:0046649	lymphocyte activation	63/3631	1.13e-06	63	0.0232
GO:0043010	camera-type eye development	27/3631	1.19e-06	27	0.0244
GO:0050731	positive regulation of peptidyl-tyrosine phosphorylation	39/3631	1.21e-06	39	0.0248
GO:2000146	negative regulation of cell motility	60/3631	1.26e-06	60	0.026
GO:0045992	negative regulation of embryonic development	14/3631	1.28e-06	14	0.0262
GO:0048754	branching morphogenesis of an epithelial tube	37/3631	1.28e-06	37	0.0264
GO:0045446	endothelial cell differentiation	16/3631	1.31e-06	16	0.027
GO:0001958	endochondral ossification	3631-12-01	1.35e-06	12	0.0277
GO:0036075	replacement ossification	3631-12-01	1.35e-06	12	0.0277
GO:0018108	peptidyl-tyrosine phosphorylation	27/3631	1.44e-06	27	0.0295
GO:0048696	regulation of collateral sprouting in absence of injury	3631-07-01	1.47e-06	7	0.0302
GO:0001525	angiogenesis	77/3631	1.49e-06	77	0.0305
GO:0035989	tendon development	3631-08-01	1.54e-06	8	0.0316
GO:0036342	post-anal tail morphogenesis	17/3631	1.66e-06	17	0.0342
GO:0032963	collagen metabolic process	23/3631	1.83e-06	23	0.0375
GO:1902115	regulation of organelle assembly	48/3631	1.85e-06	48	0.0379
GO:0043588	skin development	22/3631	1.86e-06	22	0.0382
GO:0060411	cardiac septum morphogenesis	26/3631	1.89e-06	26	0.0388
GO:0050769	positive regulation of neurogenesis	108/3631	1.92e-06	108	0.0394
GO:0043067	regulation of programmed cell death	208/3631	2.43e-06	208	0.05
GO:0072307	regulation of metanephric nephron tubule epithelial cell differentiation	3631-09-01	2.47e-060.0508
GO:0031345	negative regulation of cell projection organization	58/3631	2.61e-06	58	0.0536
GO:0043049	otic placode formation	3631-10-01	2.77e-06	10	0.0569
GO:0014706	striated muscle tissue development	34/3631	2.83e-06	34	0.0581
GO:0032507	maintenance of protein location in cell	30/3631	2.92e-06	30	0.0601
GO:0031214	biomineral tissue development	21/3631	2.95e-06	21	0.0605
GO:0007224	smoothened signaling pathway	25/3631	3e-06	25	0.0616
GO:0035113	embryonic appendage morphogenesis	25/3631	3e-06	25	0.0616
GO:1902903	regulation of supramolecular fiber organization	88/3631	3.07e-06	88	0.0631
GO:0065009	regulation of molecular function	364/3631	3.09e-06	364	0.0634
GO:0042981	regulation of apoptotic process	205/3631	3.15e-06	205	0.0647
GO:0010976	positive regulation of neuron projection development	78/3631	3.36e-06	78	0.069
GO:0043254	regulation of protein complex assembly	91/3631	3.39e-06	91	0.0696
GO:0031022	nuclear migration along microfilament	3631-06-01	3.45e-06	6	0.071
GO:0043085	positive regulation of catalytic activity	180/3631	3.53e-06	180	0.0726
GO:0042531	positive regulation of tyrosine phosphorylation of STAT protein	15/3631	3.74e-06	15	0.0768
GO:0048671	negative regulation of collateral sprouting	13/3631	3.83e-06	13	0.0786
GO:0051246	regulation of protein metabolic process	368/3631	4.16e-06	368	0.0855
GO:0042692	muscle cell differentiation	32/3631	4.2e-06	32	0.0863
GO:0031101	fin regeneration	3631-11-01	4.24e-06	11	0.087
GO:0008589	regulation of smoothened signaling pathway	28/3631	4.44e-06	28	0.0913
GO:0030030	cell projection organization	186/3631	4.51e-06	186	0.0926
GO:0042733	embryonic digit morphogenesis	20/3631	4.66e-06	20	0.0958
GO:0007182	common-partner SMAD protein phosphorylation	3631-09-01	4.83e-06	9	0.0993
GO:0098868	bone growth	3631-10-01	4.86e-06	10	0.0998
GO:0042481	regulation of odontogenesis	3631-10-01	4.86e-06	10	0.0998
GO:2000542	negative regulation of gastrulation	3631-10-01	4.86e-06	10	0.0998
GO:0006396	RNA processing	19/3631	3.08e-17	19	6.34e-13
GO:1901360	organic cyclic compound metabolic process	224/3631	9.39e-16	224	1.93e-11
GO:0006139	nucleobase-containing compound metabolic process	188/3631	2.66e-15	188	5.47e-11
GO:0046483	heterocycle metabolic process	203/3631	5.87e-15	203	1.2e-10
GO:0034641	cellular nitrogen compound metabolic process	238/3631	2.09e-14	238	4.3e-10
GO:0006725	cellular aromatic compound metabolic process	211/3631	4.73e-14	211	9.71e-10
GO:0016070	RNA metabolic process	70/3631	3.26e-13	70	6.71e-09
GO:0034622	cellular protein-containing complex assembly	30/3631	6.73e-13	30	1.38e-08
GO:0090304	nucleic acid metabolic process	154/3631	3.94e-12	154	8.09e-08
GO:0016071	mRNA metabolic process	17/3631	5e-11	17	1.03e-06
GO:0034470	ncRNA processing	3631-04-01	1.46e-10	4	2.99e-06
GO:0034660	ncRNA metabolic process	3631-11-01	2.63e-10	11	5.41e-06
GO:0006397	mRNA processing	13/3631	1.34e-08	13	0.000276
GO:0071826	ribonucleoprotein complex subunit organization	3631-03-01	2.3e-08	3	0.000472
GO:0008380	RNA splicing	3631-10-01	8.7e-08	10	0.00179
GO:0022618	ribonucleoprotein complex assembly	3631-03-01	2.2e-07	3	0.00452
GO:0031012	extracellular matrix	202/3631	2.62e-45	202	5.39e-41
GO:0005581	collagen trimer	86/3631	1.96e-40	86	4.02e-36
GO:0044421	extracellular region part	450/3631	1.41e-33	450	2.89e-29
GO:0062023	collagen-containing extracellular matrix	137/3631	1.02e-32	137	2.09e-28
GO:0005575	cellular_component	2608/3631	1.46e-32	2608	3e-28
GO:0005615	extracellular space	266/3631	5.43e-26	266	1.12e-21
GO:0005576	extracellular region	263/3631	2.6e-24	263	5.34e-20
GO:0005604	basement membrane	66/3631	1.32e-20	66	2.7e-16
GO:0044420	extracellular matrix component	41/3631	1.3e-16	41	2.66e-12
GO:0044464	cell part	2300/3631	3.28e-16	2300	6.74e-12
GO:0005886	plasma membrane	648/3631	3.77e-13	648	7.75e-09
GO:0005788	endoplasmic reticulum lumen	61/3631	9.43e-13	61	1.94e-08
GO:0005583	fibrillar collagen trimer	14/3631	1.72e-11	14	3.53e-07
GO:0106083	nuclear membrane protein complex	22/3631	4.28e-11	22	8.79e-07
GO:0106094	nuclear membrane microtubule tethering complex	22/3631	4.28e-11	22	8.79e-07
GO:0034993	meiotic nuclear membrane microtubule tethering complex	22/3631	4.28e-11	22	8.79e-07
GO:0005595	collagen type XII trimer	3631-09-01	3.9e-10	9	8.01e-06
GO:0044459	plasma membrane part	538/3631	3.55e-09	538	7.29e-05
GO:0030934	anchoring collagen complex	3631-09-01	3.58e-09	9	7.36e-05
GO:0005640	nuclear outer membrane	23/3631	6.42e-09	23	0.000132
GO:0009986	cell surface	112/3631	2.29e-08	112	0.00047
GO:0005593	FACIT collagen trimer	3631-11-01	2.33e-08	11	0.000479
GO:0016020	membrane	1046/3631	7.34e-08	1046	0.00151
GO:0070161	anchoring junction	115/3631	7.36e-08	115	0.00151
GO:0005634	nucleus	751/3631	2.24e-07	751	0.00461
GO:0044424	intracellular part	1914/3631	7.63e-07	1914	0.0157
GO:0031981	nuclear lumen	3631-07-01	1.47e-06	7	0.0302
GO:0070013	intracellular organelle lumen	120/3631	1.73e-06	120	0.0355
GO:0031974	membrane-enclosed lumen	120/3631	1.9e-06	120	0.039
GO:0043233	organelle lumen	120/3631	1.9e-06	120	0.039
GO:0005912	adherens junction	106/3631	3.02e-06	106	0.0621
GO:0043259	laminin-10 complex	3631-06-01	3.45e-06	6	0.071
GO:0043227	membrane-bounded organelle	1205/3631	4.15e-06	1205	0.0853
GO:0032437	cuticular plate	3631-10-01	4.86e-06	10	0.0998
GO:1990904	ribonucleoprotein complex	48/3631	3.45e-07	48	0.00708
GO:1990351	transporter complex	30/3631	1.52e-06	30	0.0313
GO:0044429	mitochondrial part	56/3631	1.62e-06	56	0.0332
GO:1902495	transmembrane transporter complex	30/3631	1.95e-06	30	0.04
GO:0005201	extracellular matrix structural constituent	105/3631	1.12e-38	105	2.31e-34
GO:0003674	molecular_function	2379/3631	1.14e-32	2379	2.33e-28
GO:0005488	binding	1980/3631	1.15e-27	1980	2.37e-23
GO:0003700	DNA binding transcription factor activity	266/3631	3.04e-18	266	6.24e-14
GO:0030020	extracellular matrix structural constituent conferring tensile strength	33/3631	5.67e-18	33	1.16e-13
GO:0000981	RNA polymerase II transcription factor activity, sequence-specific DNA binding	209/3631	6.99e-17209	1.44e-12
GO:0003677	DNA binding	452/3631	1.4e-16	452	2.88e-12
GO:0005515	protein binding	1080/3631	2.66e-15	1080	5.46e-11
GO:0140110	transcription regulator activity	302/3631	1.22e-14	302	2.51e-10
GO:0005539	glycosaminoglycan binding	75/3631	2.31e-14	75	4.75e-10
GO:0005198	structural molecule activity	190/3631	3.96e-13	190	8.14e-09
GO:0046872	metal ion binding	781/3631	1.28e-12	781	2.63e-08
GO:0008201	heparin binding	59/3631	1.95e-12	59	4.01e-08
GO:0043169	cation binding	784/3631	1.22e-11	784	2.51e-07
GO:0043565	sequence-specific DNA binding	214/3631	5.19e-11	214	1.07e-06
GO:0044212	transcription regulatory region DNA binding	165/3631	1.14e-10	165	2.34e-06
GO:0001067	regulatory region nucleic acid binding	165/3631	1.17e-10	165	2.4e-06
GO:0001012	RNA polymerase II regulatory region DNA binding	134/3631	4.09e-10	134	8.41e-06
GO:0098772	molecular function regulator	292/3631	7.68e-10	292	1.58e-05
GO:0005102	signaling receptor binding	251/3631	1.23e-09	251	2.53e-05
GO:1901681	sulfur compound binding	66/3631	2.98e-09	66	6.13e-05
GO:0000977	RNA polymerase II regulatory region sequence-specific DNA binding	130/3631	3.33e-09130	6.84e-05
GO:0004714	transmembrane receptor protein tyrosine kinase activity	40/3631	4.46e-09	40	9.16e-05
GO:0000976	transcription regulatory region sequence-specific DNA binding	137/3631	2.55e-08	137	0.000523
GO:0043167	ion binding	1081/3631	2.92e-08	1081	0.0006
GO:0005518	collagen binding	28/3631	3.81e-08	28	0.000783
GO:0019199	transmembrane receptor protein kinase activity	43/3631	5.52e-08	43	0.00113
GO:1990837	sequence-specific double-stranded DNA binding	138/3631	8.28e-08	138	0.0017
GO:0050839	cell adhesion molecule binding	94/3631	1e-07	94	0.00205
GO:0051020	GTPase binding	132/3631	2.23e-07	132	0.00459
GO:0050840	extracellular matrix binding	24/3631	2.31e-07	24	0.00474
GO:0001227	transcriptional repressor activity, RNA polymerase II transcription regulatory region sequence-specific DNA binding	57/3631	2.62e-07	57	0.00539
GO:0003690	double-stranded DNA binding	148/3631	2.76e-07	148	0.00567
GO:0005085	guanyl-nucleotide exchange factor activity	76/3631	2.96e-07	76	0.00609
GO:0019838	growth factor binding	47/3631	3.23e-07	47	0.00663
GO:0017048	Rho GTPase binding	62/3631	5.78e-07	62	0.0119
GO:0030215	semaphorin receptor binding	18/3631	5.98e-07	18	0.0123
GO:0060089	molecular transducer activity	224/3631	6.14e-07	224	0.0126
GO:0038191	neuropilin binding	15/3631	6.32e-07	15	0.013
GO:0005088	Ras guanyl-nucleotide exchange factor activity	59/3631	6.36e-07	59	0.0131
GO:0000987	proximal promoter sequence-specific DNA binding	92/3631	6.41e-07	92	0.0132
GO:0005089	Rho guanyl-nucleotide exchange factor activity	41/3631	9.47e-07	41	0.0194
GO:0038023	signaling receptor activity	221/3631	1.38e-06	221	0.0283
GO:0000978	RNA polymerase II proximal promoter sequence-specific DNA binding	88/3631	1.7e-06	88	0.0349
GO:0048018	receptor ligand activity	72/3631	1.77e-06	72	0.0364
GO:0003714	transcription corepressor activity	51/3631	4.09e-06	51	0.084
GO:0003676	nucleic acid binding	553/3631	4.35e-06	553	0.0894
GO:0030594	neurotransmitter receptor activity	3631-03-01	4.59e-07	3	0.00943
GO:0022839	ion gated channel activity	36/3631	2.18e-06	36	0.0447
GO:0017111	nucleoside-triphosphatase activity	85/3631	2.29e-06	85	0.0471
GO:0016462	pyrophosphatase activity	91/3631	3.77e-06	91	0.0775

## Sheet: DEG_Tmar_invitro_vs_invivo_24h
DEG of Tmar in vivo vs in vitro
Log2FC > 0 = + up-regulated infected-24h compared tocontrol
gene	log2FC	FDR	Old_locus_tag	Ref_NCBI
ccoS	-2.16745	3.08985e-05	MARIT_0566	SFZ80459.1
cobA	-3.61411	8.78076e-12	MARIT_2610	SFZ84159.1
ffs	-4.26483	1.16277e-74	MARIT_MISC_RNA_7	SRP_bact
gldI	-2.00528	1.48405e-52	MARIT_2197	SFZ83720.1
gltD	2.34828	3.48127e-09	MARIT_2550	SFZ84106.1
grpE	-2.661	9.68564e-15	MARIT_1838	SFZ82970.1
hemL	-2.78925	3.90694e-41	MARIT_2115	SFZ83552.1
katG	3.07524	3.40374e-26	MARIT_0946	SFZ81093.1
MARIT_RS00110	-2.13043	2.02681e-37	MARIT_0022	SFZ79943.1
MARIT_RS00345	-3.90667	4.77212e-43	MARIT_TRNA1	tRNA-Leu
MARIT_RS00355	-2.44685	4.68358e-27	MARIT_0075	SFZ79996.1
MARIT_RS00475	6.56062	6.2209e-51	MARIT_0099	SFZ80020.1
MARIT_RS00480	5.64678	7.05945e-72	MARIT_0100	SFZ80021.1
MARIT_RS00485	5.24909	1.21054e-75	MARIT_0101	SFZ80022.1
MARIT_RS00490	5.17352	2.43539e-81	MARIT_0102	SFZ80023.1
MARIT_RS00495	4.67561	9.01367e-59	MARIT_0103	SFZ80024.1
MARIT_RS00600	2.54058	1.58709e-40	MARIT_0124	SFZ80045.1
MARIT_RS00625	2.83123	5.64248e-09	MARIT_RS00625
MARIT_RS00700	-10.3041	2.65832e-57	MARIT_16S_RRNA_2	ribosomal RNA 16S ribosomal RNA
MARIT_RS00705	-5.05975	6.19159e-92	MARIT_TRNA2	tRNA-Ile
MARIT_RS00710	-4.90542	3.955e-55	MARIT_TRNA3	tRNA-Ala
MARIT_RS00715	-7.41214	9.13578e-39	MARIT_23S_RRNA_2	ribosomal RNA 23S ribosomal RNA
MARIT_RS00970	-2.62638	1.68566e-47	MARIT_TRNA4	tRNA-Cys
MARIT_RS00975	-2.1105	1.11275e-26	MARIT_TRNA5	tRNA-Asn
MARIT_RS01035	2.90553	1.17998e-44	MARIT_0213	SFZ80123.1
MARIT_RS01040	2.60958	2.03833e-35	MARIT_0214	SFZ80124.1
MARIT_RS01380	2.27631	2.66732e-24	MARIT_0283	SFZ80193.1
MARIT_RS01440	2.53878	5.11055e-33	MARIT_0296	SFZ80205.1
MARIT_RS01445	2.26205	3.46188e-36	MARIT_0297	SFZ80206.1
MARIT_RS01450	2.60212	5.32213e-56	MARIT_0298	SFZ80207.1
MARIT_RS01810	2.13889	4.89502e-45	MARIT_0368	SFZ80274.1
MARIT_RS02050	-2.10168	9.89947e-55	MARIT_0419	SFZ80322.1
MARIT_RS02135	2.692	3.07069e-50	MARIT_0437	SFZ80339.1
MARIT_RS02195	-2.31547	4.07208e-12	MARIT_0450	SFZ80352.1
MARIT_RS02210	-2.95004	6.1623e-114	MARIT_0453	SFZ80355.1
MARIT_RS02240	-3.46569	6.75984e-48	MARIT_0459	SFZ80361.1
MARIT_RS02325	-2.94104	3.25227e-19	MARIT_0476	SFZ80377.1
MARIT_RS02330	-2.40715	1.24897e-39	MARIT_0477	SFZ80378.1
MARIT_RS02395	-3.19416	3.65882e-08	MARIT_16S_RRNA_5	ribosomal RNA 16S ribosomal RNA
MARIT_RS02595	-3.34289	1.40031e-78	MARIT_0530	SFZ80425.1
MARIT_RS02660	-2.11898	2.70151e-12	MARIT_TRNA9	tRNA-Arg
MARIT_RS02810	2.30683	1.17174e-24	MARIT_0576	SFZ80467.1
MARIT_RS03195	-2.60625	7.48378e-23	MARIT_0661	SFZ80539.1
MARIT_RS03245	-2.06519	5.1523e-10	MARIT_0672	SFZ80550.1
MARIT_RS03410	-2.7848	8.14472e-62	MARIT_0709	SFZ80606.1
MARIT_RS03415	-3.07496	2.21794e-33	MARIT_0711	SFZ80608.1
MARIT_RS03420	-2.78001	3.81718e-40	MARIT_0712	SFZ80610.1
MARIT_RS03425	-3.94131	9.51803e-54	MARIT_0713	SFZ80612.1
MARIT_RS03450	-2.45852	2.93185e-45	MARIT_0718	SFZ80624.1
MARIT_RS03565	-2.41852	3.79318e-52	MARIT_0742	SFZ80673.1
MARIT_RS03695	-2.81702	7.62332e-18	MARIT_0769	SFZ80729.1
MARIT_RS03760	3.26865	1.93533e-13	MARIT_0780	SFZ80757.1
MARIT_RS03880	-2.0291	1.18578e-23	MARIT_0804	SFZ80808.1
MARIT_RS03885	-3.37716	1.95314e-34	MARIT_0805	SFZ80810.1
MARIT_RS03890	-3.79272	1.163e-23	MARIT_0806	SFZ80812.1
MARIT_RS03895	-2.8109	3.39065e-43	MARIT_0807	SFZ80814.1
MARIT_RS03900	-2.34054	9.30511e-22	MARIT_0808	SFZ80816.1
MARIT_RS03905	-2.40067	3.12713e-37	MARIT_0809	SFZ80817.1
MARIT_RS03910	-2.07322	4.10281e-33	MARIT_0810	SFZ80819.1
MARIT_RS03955	-2.24503	1.52667e-33	MARIT_0819	SFZ80837.1
MARIT_RS03960	-2.80262	1.62732e-17	MARIT_0820	SFZ80839.1
MARIT_RS03975	-2.25241	7.13486e-42	MARIT_0823	SFZ80845.1
MARIT_RS03980	-2.00631	7.11245e-08	MARIT_RS03980
MARIT_RS04130	-2.69433	7.24775e-21	MARIT_0858	SFZ80906.1
MARIT_RS04135	-2.77115	1.9221e-32	MARIT_0859	SFZ80908.1
MARIT_RS04140	-2.56149	7.85948e-19	MARIT_0860	SFZ80910.1
MARIT_RS04365	-2.07301	5.46654e-05	MARIT_TRNA50	tRNA-Pro
MARIT_RS04455	2.36615	1.96912e-10	MARIT_0923	SFZ81045.1
MARIT_RS04520	-2.1584	4.81716e-13	MARIT_TRNA49	tRNA-Pro
MARIT_RS04710	2.33562	9.75435e-43	MARIT_TRNA16	tRNA-Gly
MARIT_RS04835	-2.24732	2.38643e-73	MARIT_0995	SFZ81205.1
MARIT_RS04910	-2.68046	8.38528e-23	MARIT_1010	SFZ81238.1
MARIT_RS04920	-2.21832	2.88699e-15	MARIT_1012	SFZ81242.1
MARIT_RS04935	-5.02342	9.35991e-108	MARIT_1015	SFZ81248.1
MARIT_RS04940	-4.69384	6.19235e-39	MARIT_1016	SFZ81250.1
MARIT_RS04955	-4.35902	7.7122e-41	MARIT_1018	SFZ81256.1
MARIT_RS04960	-3.59361	1.29599e-32	MARIT_1019	SFZ81258.1
MARIT_RS04975	-2.12852	1.00412e-31	MARIT_1022	SFZ81265.1
MARIT_RS05045	-2.40162	1.31393e-64	MARIT_1037	SFZ81292.1
MARIT_RS05135	-3.03038	1.67655e-77	MARIT_1056	SFZ81335.1
MARIT_RS05140	-3.47415	2.75782e-35	MARIT_1057	SFZ81337.1
MARIT_RS05270	2.93691	1.12085e-09	MARIT_1085	SFZ81395.1
MARIT_RS05300	2.83829	9.75569e-31	MARIT_1091	SFZ81408.1
MARIT_RS05305	5.08564	3.21859e-26	MARIT_1092	SFZ81410.1
MARIT_RS05310	4.86503	1.99748e-21	MARIT_1093	SFZ81412.1
MARIT_RS05315	4.08696	1.25912e-15	MARIT_1094	SFZ81414.1
MARIT_RS05320	3.50968	8.70988e-10	MARIT_1095	SFZ81416.1
MARIT_RS05325	2.53837	5.56137e-06	MARIT_1097	SFZ81419.1
MARIT_RS05330	2.90532	4.29339e-09	MARIT_1098	SFZ81421.1
MARIT_RS05340	2.68124	3.67048e-11	MARIT_1100	SFZ81425.1
MARIT_RS05345	2.40782	2.10246e-07	MARIT_1101	SFZ81427.1
MARIT_RS05350	2.55212	1.24084e-09	MARIT_1102	SFZ81428.1
MARIT_RS05560	-2.70554	3.29081e-06	MARIT_1150	SFZ81516.1
MARIT_RS05580	-2.52164	4.74609e-70	MARIT_1154	SFZ81524.1
MARIT_RS05585	-3.70053	8.10696e-71	MARIT_1155	SFZ81527.1
MARIT_RS05590	-3.1469	7.00842e-45	MARIT_1156	SFZ81529.1
MARIT_RS05595	-2.87151	3.95232e-37	MARIT_1157	SFZ81531.1
MARIT_RS05600	-2.67509	2.47009e-36	MARIT_1158	SFZ81533.1
MARIT_RS05605	-2.68127	2.03994e-27	MARIT_1159	SFZ81535.1
MARIT_RS05610	-2.92558	3.16838e-26	MARIT_1160	SFZ81537.1
MARIT_RS05615	-2.12872	6.60067e-31	MARIT_1161	SFZ81539.1
MARIT_RS05620	-2.5424	1.70222e-23	MARIT_1162	SFZ81541.1
MARIT_RS05630	-2.40664	3.95253e-21	MARIT_1164	SFZ81545.1
MARIT_RS05635	-2.53882	4.06938e-37	MARIT_1165	SFZ81547.1
MARIT_RS05665	-2.52911	3.50972e-09	MARIT_1171	SFZ81560.1
MARIT_RS05675	-2.08327	1.2219e-16	MARIT_1173	SFZ81564.1
MARIT_RS05700	-2.67432	1.04513e-18	MARIT_1182	SFZ81577.1
MARIT_RS05875	-2.91128	1.23838e-21	MARIT_1218	SFZ81653.1
MARIT_RS06055	-2.01398	1.15364e-23	MARIT_1260
MARIT_RS06505	-2.18142	1.04206e-25	MARIT_1354	SFZ81947.1
MARIT_RS06510	-2.18448	3.41789e-36	MARIT_1355	SFZ81949.1
MARIT_RS06535	2.08012	6.13452e-17	MARIT_1360	SFZ81960.1
MARIT_RS06605	-2.09559	2.31929e-06	MARIT_1372	SFZ81987.1
MARIT_RS06620	-2.22946	1.30891e-46	MARIT_1388	SFZ81993.1
MARIT_RS06650	2.32669	1.09819e-92	MARIT_1396	SFZ82009.1
MARIT_RS06655	2.19629	2.32661e-90	MARIT_1397	SFZ82011.1
MARIT_RS06940	4.80481	1.82477e-95	MARIT_1457	SFZ82133.1
MARIT_RS06945	2.58453	4.67167e-28	MARIT_RS06945
MARIT_RS06990	2.11873	2.381e-39	MARIT_1466	SFZ82152.1
MARIT_RS07645	2.90059	3.32259e-29	MARIT_1601	SFZ82464.1
MARIT_RS07975	-6.17464	4.96088e-68	MARIT_1670	SFZ82611.1
MARIT_RS07980	-5.30642	4.85345e-58	MARIT_1671	SFZ82615.1
MARIT_RS08085	-2.94161	3.20298e-10	MARIT_RS08085
MARIT_RS08090	-2.66665	4.37066e-14	MARIT_1694	SFZ82661.1
MARIT_RS08095	2.92325	9.9947e-19	MARIT_1695	SFZ82663.1
MARIT_RS08135	-2.53184	1.40972e-08	MARIT_1704	SFZ82680.1
MARIT_RS08140	-2.71678	6.79263e-12	MARIT_1705	SFZ82682.1
MARIT_RS08145	-3.0673	2.08529e-16	MARIT_1706	SFZ82684.1
MARIT_RS08245	-2.11523	1.05498e-17	MARIT_1727	SFZ82730.1
MARIT_RS08295	-2.17146	4.22057e-27	MARIT_1737	SFZ82752.1
MARIT_RS08300	-2.17093	4.68172e-23	MARIT_1738	SFZ82754.1
MARIT_RS08305	-3.03565	5.78162e-24	MARIT_1739	SFZ82756.1
MARIT_RS08310	-2.94459	3.18131e-24	MARIT_1740	SFZ82759.1
MARIT_RS08385	-2.92792	4.49513e-16	MARIT_TRNA20	tRNA-Leu
MARIT_RS08390	-2.8628	1.40537e-12	MARIT_TRNA21	tRNA-Lys
MARIT_RS08785	-2.29657	2.0226e-09	MARIT_1837	SFZ82967.1
MARIT_RS09185	2.59915	6.81269e-35	MARIT_1919	SFZ83159.1
MARIT_RS09300	-2.01983	2.32163e-22	MARIT_1948	SFZ83213.1
MARIT_RS09310	-2.28835	2.03591e-16	MARIT_1950	SFZ83217.1
MARIT_RS09335	-5.48167	2.23248e-20	MARIT_1955
MARIT_RS09340	-3.91207	1.51802e-114	MARIT_1956	SFZ83230.1
MARIT_RS09370	-6.66462	8.81536e-19	MARIT_23S_RRNA_1	ribosomal RNA 23S ribosomal RNA
MARIT_RS09380	-3.93009	1.94914e-35	MARIT_TRNA45	tRNA-Ile
MARIT_RS09385	-7.13325	2.51191e-17	MARIT_16S_RRNA_1	ribosomal RNA 16S ribosomal RNA
MARIT_RS09615	2.11036	5.47138e-25	MARIT_2022	SFZ83349.1
MARIT_RS09745	-5.35869	6.96982e-99	MARIT_TRNA22	tRNA-Ser
MARIT_RS09820	-2.14073	9.19189e-27	MARIT_2057	SFZ83420.1
MARIT_RS09995	-2.21773	1.14311e-14	MARIT_2095	SFZ83503.1
MARIT_RS10055	-2.47116	1.25397e-07	MARIT_2107	SFZ83531.1
MARIT_RS10060	-2.35397	6.46328e-28	MARIT_2109	SFZ83534.1
MARIT_RS10095	-2.8504	4.86801e-44	MARIT_2116	SFZ83556.1
MARIT_RS10100	-2.67783	5.90604e-32	MARIT_2117	SFZ83559.1
MARIT_RS10315	-4.84513	5.52336e-09	MARIT_23S_RRNA_6	ribosomal RNA 23S ribosomal RNA
MARIT_RS10450	-2.10529	1.10422e-34	MARIT_TRNA39	tRNA-Ser
MARIT_RS10580	-2.01045	5.96522e-24	MARIT_2212	SFZ83754.1
MARIT_RS10620	-3.25299	1.10991e-57	MARIT_2220	SFZ83773.1
MARIT_RS10920	-2.38832	6.20283e-24	MARIT_2288	SFZ83847.1
MARIT_RS10925	-2.36056	9.52024e-27	MARIT_2289	SFZ83848.1
MARIT_RS11125	2.78972	2.88959e-67	MARIT_2326	SFZ83885.1
MARIT_RS11135	2.23799	1.40493e-18	MARIT_2328	SFZ83887.1
MARIT_RS11140	-3.65447	4.03149e-36	MARIT_TRNA38	tRNA-Tyr
MARIT_RS11145	-2.89042	6.74874e-28	MARIT_TRNA37	tRNA-Lys
MARIT_RS11290	2.18021	2.11795e-62	MARIT_2357	SFZ83916.1
MARIT_RS11385	4.28668	8.12603e-98	MARIT_2376	SFZ83935.1
MARIT_RS11390	4.74674	3.78691e-136	MARIT_2377	SFZ83936.1
MARIT_RS11395	4.98984	2.78586e-152	MARIT_2378	SFZ83937.1
MARIT_RS11400	4.44625	2.26917e-144	MARIT_2379	SFZ83938.1
MARIT_RS11520	2.63534	3.20971e-16	MARIT_2404	SFZ83963.1
MARIT_RS11540	2.30056	2.23816e-11	MARIT_2408	SFZ83967.1
MARIT_RS11835	-2.30942	5.9995e-06	MARIT_2470	SFZ84028.1
MARIT_RS11935	6.56751	2.75582e-42	MARIT_2490	SFZ84047.1
MARIT_RS12015	2.42307	9.07667e-24	MARIT_2507	SFZ84064.1
MARIT_RS12075	6.01804	4.62986e-193	MARIT_2519	SFZ84076.1
MARIT_RS12235	3.4671	1.91858e-11	MARIT_2549	SFZ84105.1
MARIT_RS12250	-3.90555	9.30836e-62	MARIT_2552	SFZ84108.1
MARIT_RS12295	-8.25658	6.70143e-25	MARIT_23S_RRNA_3	ribosomal RNA 23S ribosomal RNA
MARIT_RS12305	-3.86399	1.24989e-21	MARIT_TRNA33	tRNA-Ile
MARIT_RS12495	-6.64515	9.60872e-33	MARIT_2604	SFZ84153.1
MARIT_RS12500	-5.15503	1.54517e-58	MARIT_2605	SFZ84154.1
MARIT_RS12505	-4.79262	4.67174e-54	MARIT_2606	SFZ84155.1
MARIT_RS12510	-4.64361	2.17613e-61	MARIT_2607	SFZ84156.1
MARIT_RS12515	-4.05313	3.33064e-35	MARIT_2608	SFZ84157.1
MARIT_RS12520	-3.9547	1.58693e-49	MARIT_2609	SFZ84158.1
MARIT_RS12530	-3.76137	1.22549e-25	MARIT_2611	SFZ84160.1
MARIT_RS12535	-3.231	8.13087e-27	MARIT_2612	SFZ84161.1
MARIT_RS12665	-2.23752	5.64735e-32	MARIT_2635	SFZ84198.1
MARIT_RS12670	-2.73249	7.69791e-33	MARIT_2636	SFZ84201.1
MARIT_RS12680	2.30354	1.63629e-73	MARIT_2638	SFZ84205.1
MARIT_RS12870	5.29284	7.79165e-87	MARIT_2678	SFZ84291.1
MARIT_RS12875	5.3163	1.85634e-106	MARIT_2679	SFZ84292.1
MARIT_RS12880	4.74227	6.4451e-155	MARIT_2680	SFZ84294.1
MARIT_RS12890	3.81365	1.50774e-83	MARIT_2682	SFZ84299.1
MARIT_RS12895	3.92592	5.63615e-89	MARIT_2683	SFZ84302.1
MARIT_RS12900	3.64615	7.05945e-72	MARIT_2684	SFZ84304.1
MARIT_RS12905	2.79587	1.71011e-32	MARIT_2686	SFZ84307.1
MARIT_RS12910	3.27767	1.19218e-62	MARIT_2687	SFZ84310.1
MARIT_RS12915	2.69245	2.71627e-10	MARIT_RS12915
MARIT_RS12945	-2.62778	5.60376e-36	MARIT_2693	SFZ84321.1
MARIT_RS13035	-2.80397	6.93298e-25	MARIT_2711
MARIT_RS13560	-2.3355	2.67953e-09	MARIT_TRNA31	tRNA-Leu
MARIT_RS13675	3.44392	3.43536e-43	MARIT_2841	SFZ84635.1
MARIT_RS13895	2.57115	2.81218e-34	MARIT_2887	SFZ84740.1
MARIT_RS14445	-2.29902	3.98466e-47	MARIT_2999	SFZ84982.1
MARIT_RS14465	-4.12944	4.43611e-94	MARIT_3003	SFZ84991.1
MARIT_RS14565	2.25881	3.81619e-51	MARIT_3023	SFZ85032.1
MARIT_RS14680	-2.20367	4.44504e-34	MARIT_3046	SFZ85080.1
MARIT_RS14690	-2.0369	1.13038e-58	MARIT_3048	SFZ85085.1
MARIT_RS14745	-2.79201	9.62043e-92	MARIT_3060	SFZ85112.1
MARIT_RS14750	-3.50808	1.37254e-93	MARIT_3061	SFZ85114.1
MARIT_RS15090	2.97374	2.31477e-40	MARIT_3129	SFZ85264.1
MARIT_RS15095	4.71638	6.10381e-52	MARIT_3130	SFZ85266.1
MARIT_RS15105	2.3201	2.62957e-78	MARIT_3132	SFZ85272.1
mraZ	-2.26371	2.33604e-58	MARIT_0529	SFZ80424.1
nagB	2.37438	3.33681e-40	MARIT_2690	SFZ84314.1

## Sheet: GO_Tmar_24h_upinvivo.txt
Gene Ontology enrichment with for T.maritimum DEGs up-regulated in vivo at 24hpi vs in vitro
GO_term	GO_name	Ratio	P	n_study	Bonferroni adj. P
GO:0009251	glucan catabolic process	6/72	5.69e-06	6	0.0235
GO:0017001	antibiotic catabolic process	4/72	9.41e-06	4	0.0388
GO:0044042	glucan metabolic process	6/72	1.33e-05	6	0.0551
GO:0006073	cellular glucan metabolic process	6/72	1.33e-05	6	0.0551
GO:0000272	polysaccharide catabolic process	6/72	1.72e-05	6	0.0711
GO:0009279	cell outer membrane	9/72	8.96e-07	9	0.0037
GO:0019867	outer membrane	9/72	1.08e-06	9	0.00447
GO:0044462	external encapsulating structure part	9/72	1.3e-06	9	0.00537
GO:0001871	pattern binding	6/72	5.69e-06	6	0.0235
GO:0030247	polysaccharide binding	6/72	5.69e-06	6	0.0235

## Sheet: GO_Tmar_24h_upinvitro.txt
Gene Ontology enrichment with for T.maritimum DEGs up-regulated in vitro at 24hpi vs in vivo
GO_term	GO_name	Ratio	P	n_study	Bonferroni adj. P
GO:0000103	sulfate assimilation	4/142	4.48e-06	4	0.0185
GO:0003674	molecular_function	42/142	6.2e-06	42	0.0256
